# Supplementary material
Source: PubMed Central journal article supplement (PMC5322858)

## OA Progression among Medication Users

Pages 1 to 16:

Box plots demonstrating the distribution of effect sizes among 8 comparisons per knee per medication.

Page 17 to 41:

Box plots demonstrating the joint space width change among users and matched definite nonusers. These box plots were assessed in the secondary screening process.

Code:

|              |                                                                                        |
|--------------|----------------------------------------------------------------------------------------|
| jsw250d      | effect size for joint space width (x = 250) at 12-month visit                          |
| jsw250deltad | effect size for joint space width (x = 250) change between 12-month and 36-month visit |
| wpaind       | effect size for WOMAC pain score at 12-month visit                                     |
| wpaindeltad  | effect size for WOMAC pain score change change between 12-month and 36-month visit     |

|         |                            |
|---------|----------------------------|
| aceinhi | ACE Inhibitors             |
| alphaad | Alpha-adrenergic Blockers  |
| anticoa | Anticoagulants             |
| anticon | Anticonvulsants            |
| antidep | Antidepressants            |
| antiest | Anti-estrogen              |
| antigou | Antigout                   |
| antihis | Antihistamines             |
| antilip | Antilipemic Agents         |
| antilir | Antilipids (Not Statins)   |
| antineo | Antineoplastic Agents      |
| antiulc | Anti-ulcer Agents          |
| anxioly | Anxiolytics                |
| betaadr | Beta-adrenergic Blockers   |
| bisphos | Bisphosphonates            |
| cachblo | Ca-Channel Blockers        |
| cox2inh | COX-2 Inhibitors           |
| diureti | Diuretics                  |
| estroge | Estrogen                   |
| fibrica | Fibric Acid                |
| hypogly | Hypoglycemics (Oral)       |
| hypoten | Angiotensin IIR Antagonist |
| nsaid   | NSAIDs                     |
| progest | Progestogens               |
| statins | Statins                    |
| sulfony | Sulfonylureas              |
| thyroid | Thyroid Agents             |
| vitB    | Vitaman B Complex          |

**Cohen Effect Size for JSW250 at 12 months Among Medications (Right)**

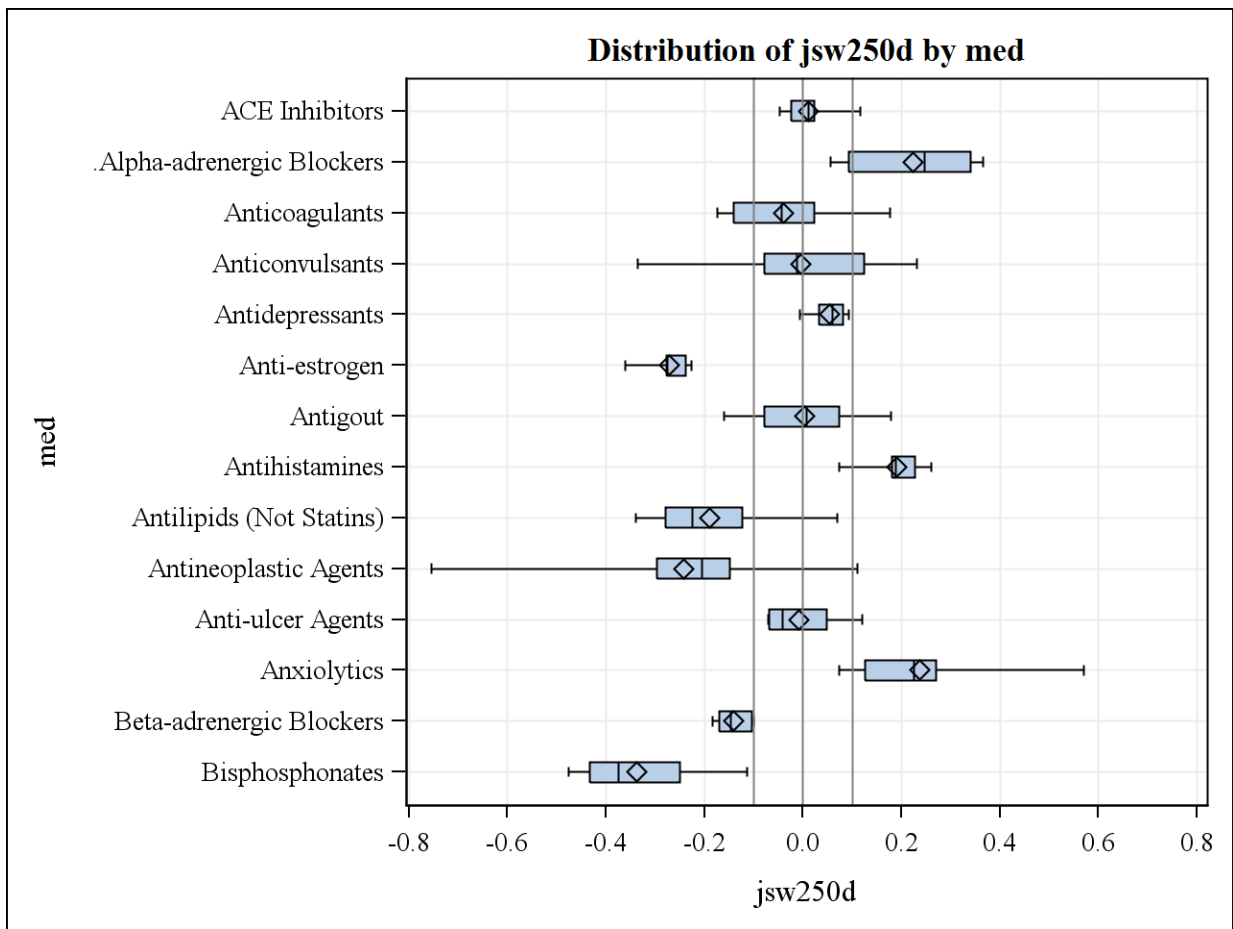

**Cohen Effect Size for JSW250 at 12 months Among Medications (Right)**

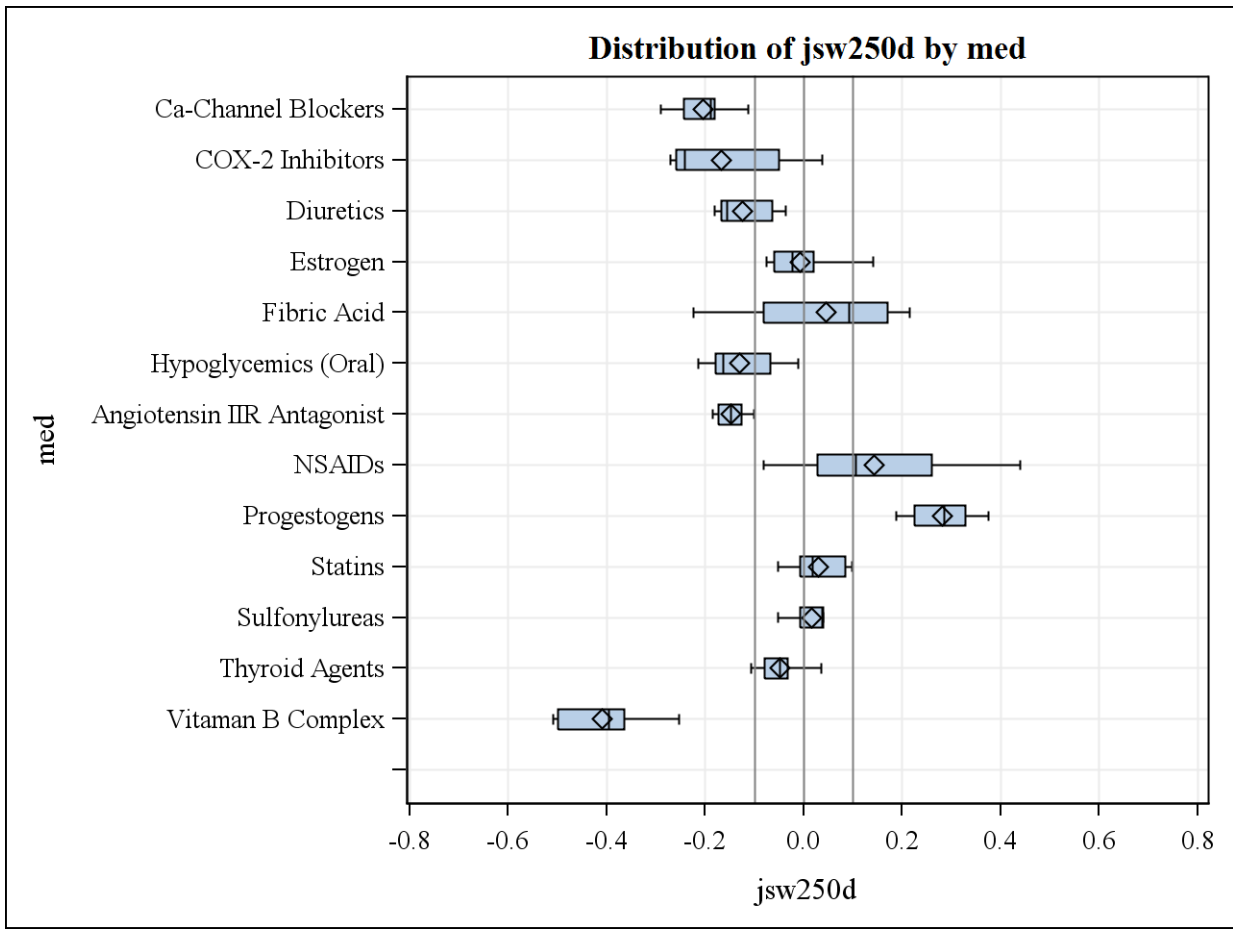

**Cohen Effect Size for JSW250 Change Among Medications (Right)**

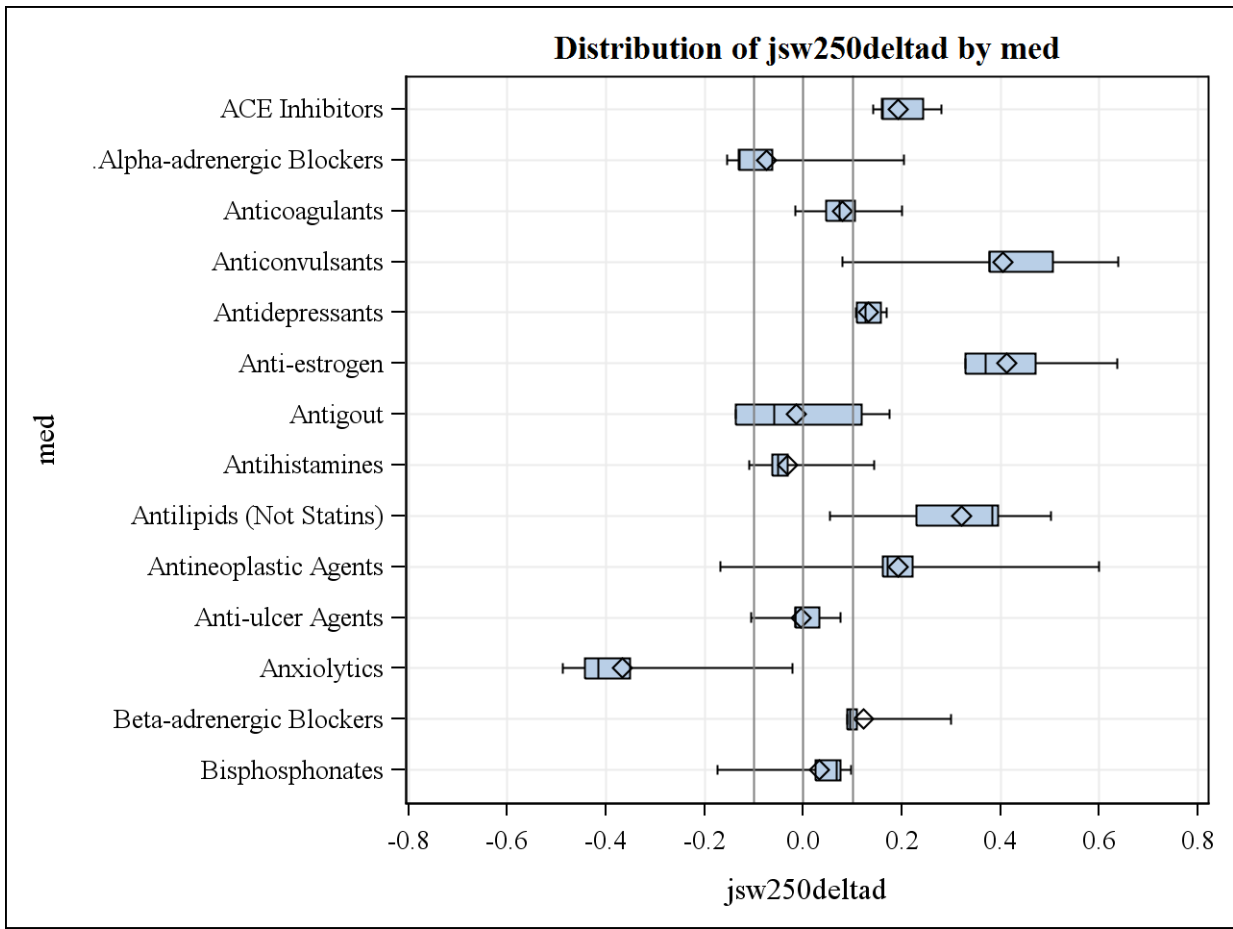

**Cohen Effect Size for JSW250 Change Among Medications (Right)**

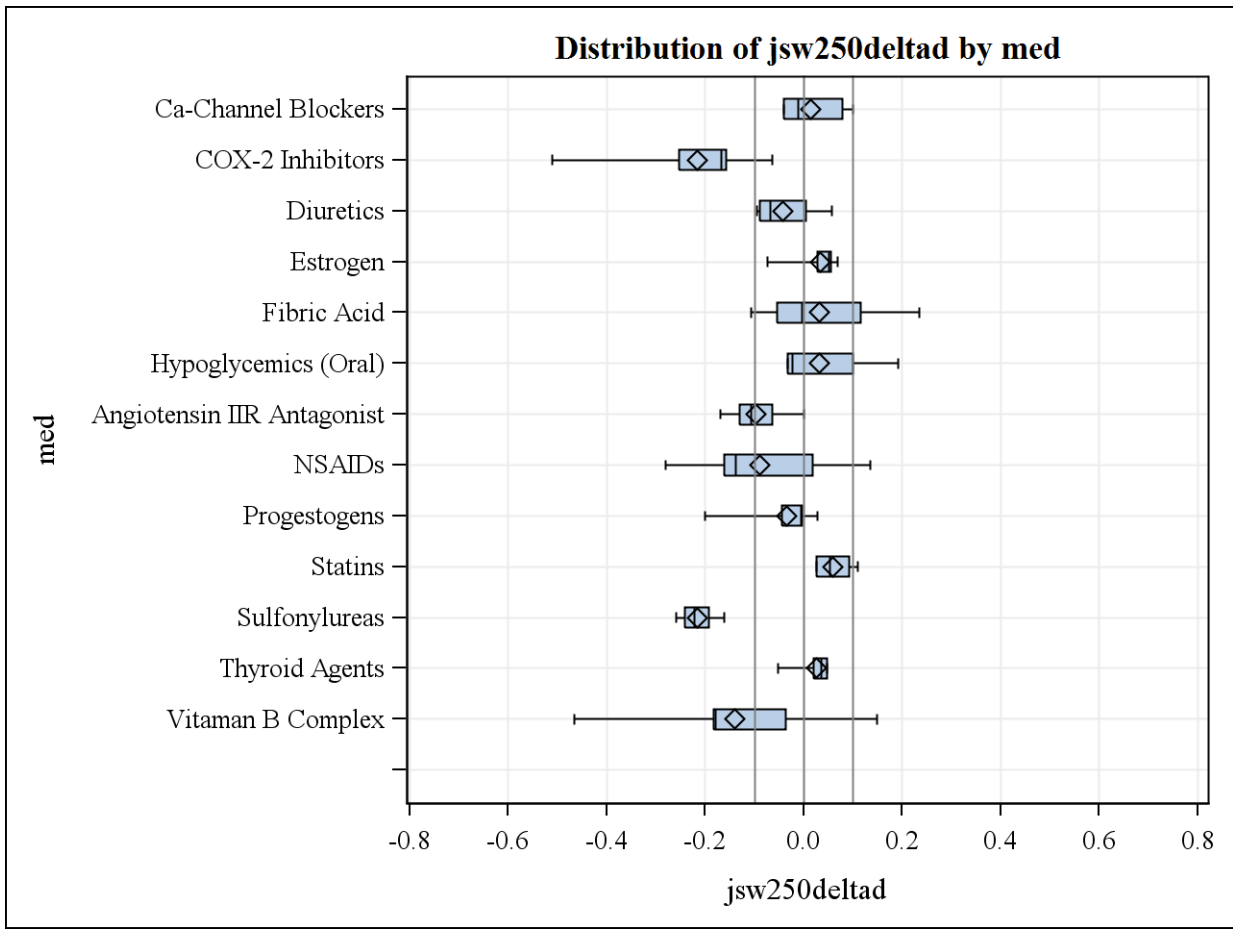

**Cohen Effect Size for WOMAC Pain at 12 months Among Medications (Right)**

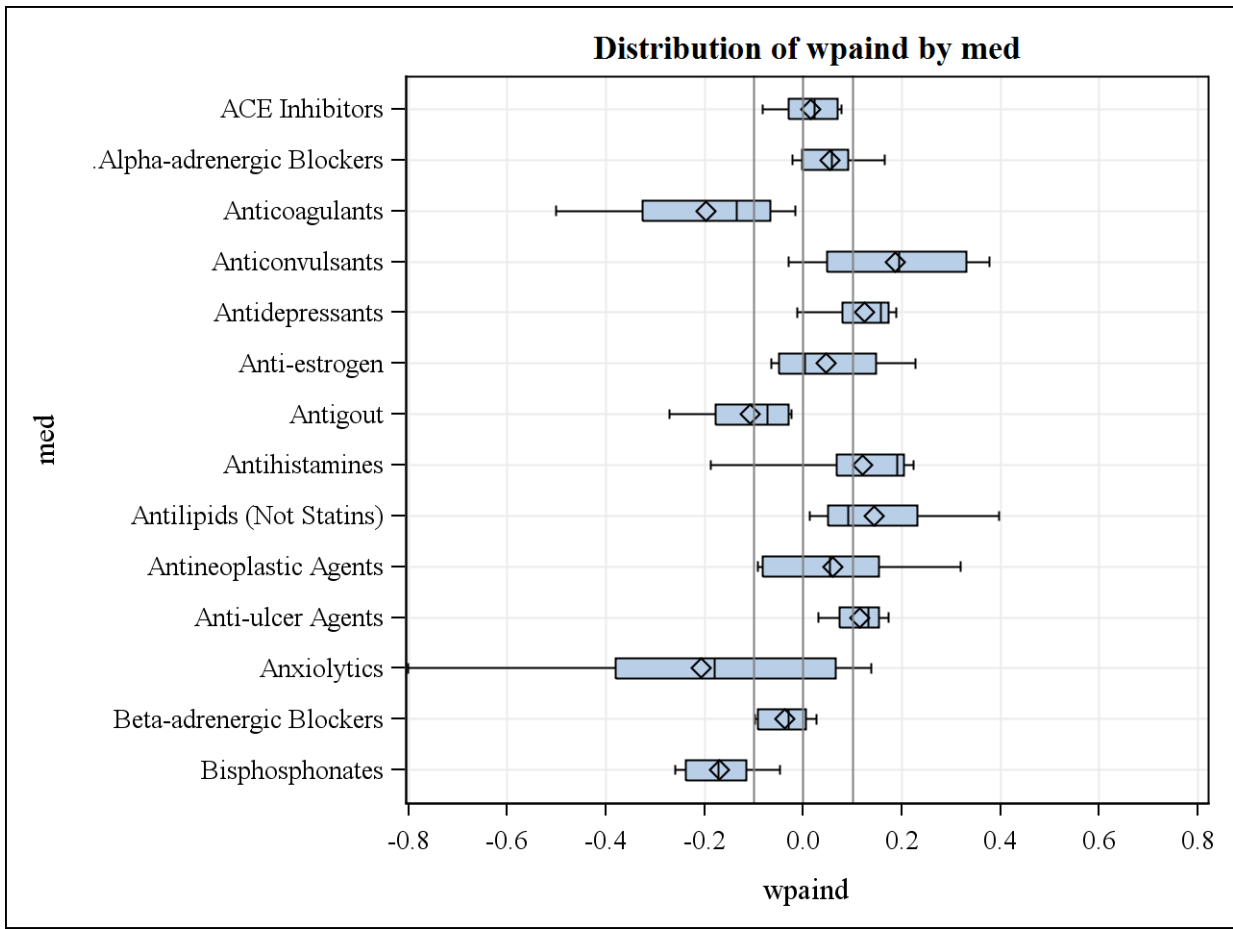

**Cohen Effect Size for WOMAC Pain at 12 months Among Medications (Right)**

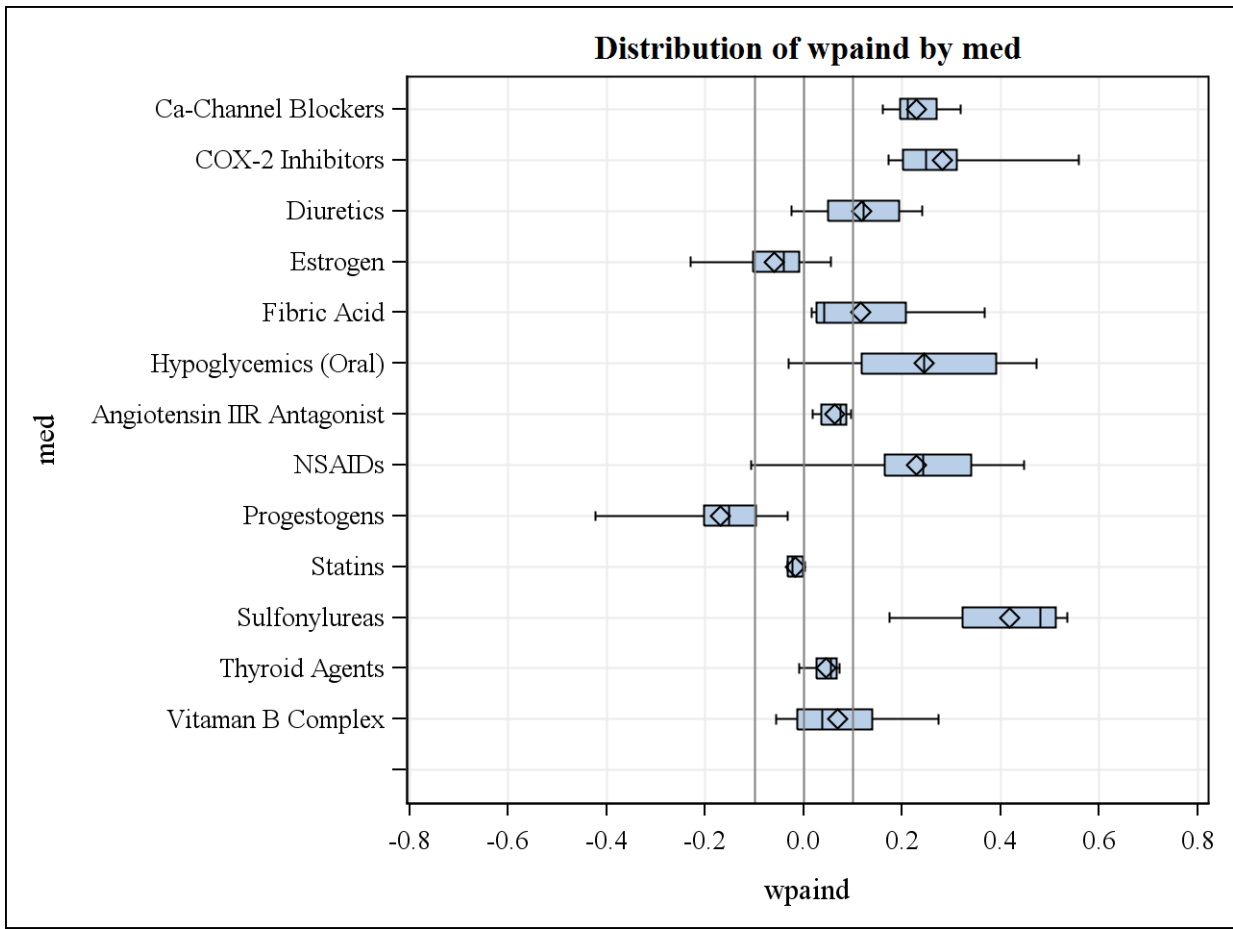

**Cohen Effect Size for WOMAC Pain Change Among Medications (Right)**

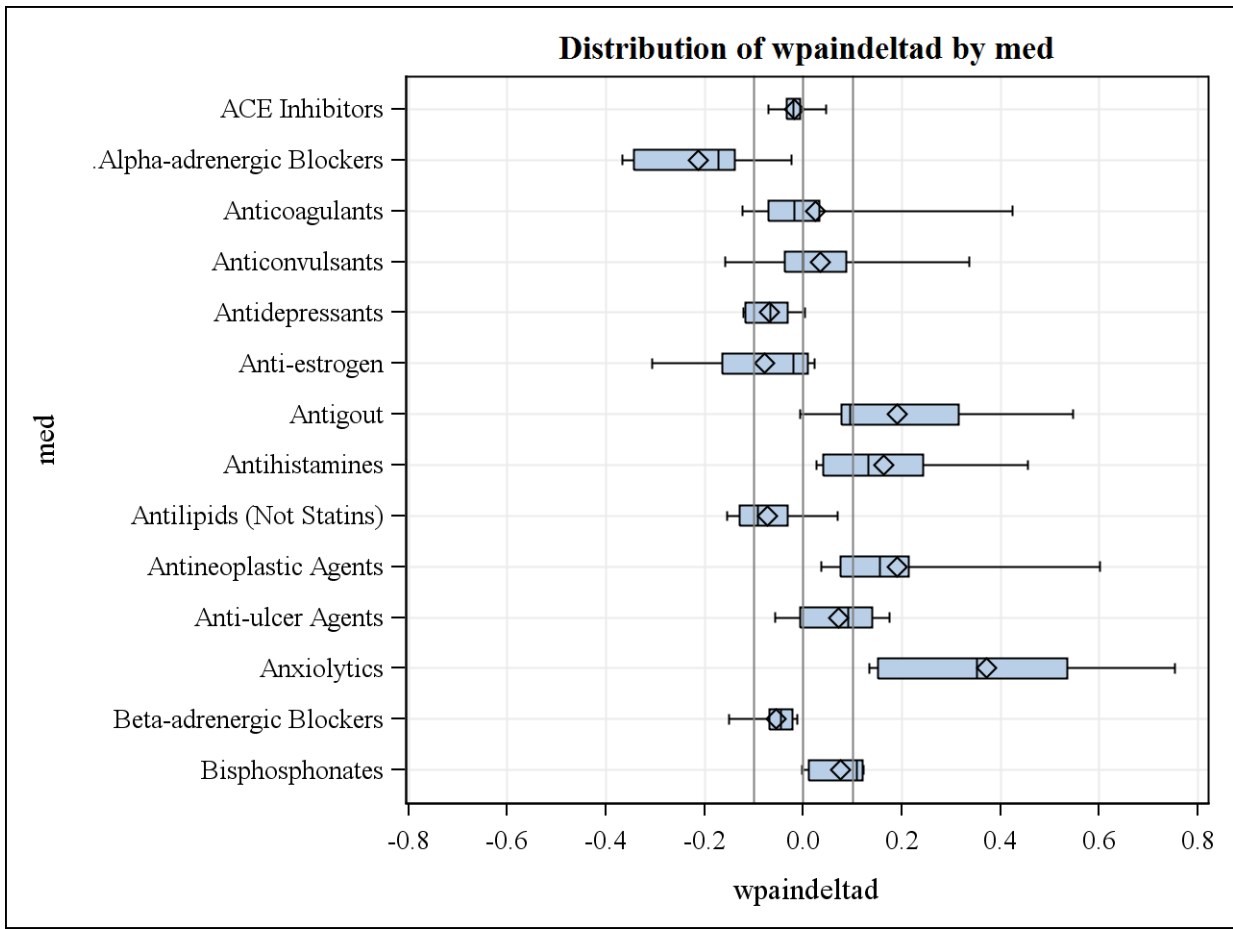



**Cohen Effect Size for WOMAC Pain Change Among Medications (Right)**

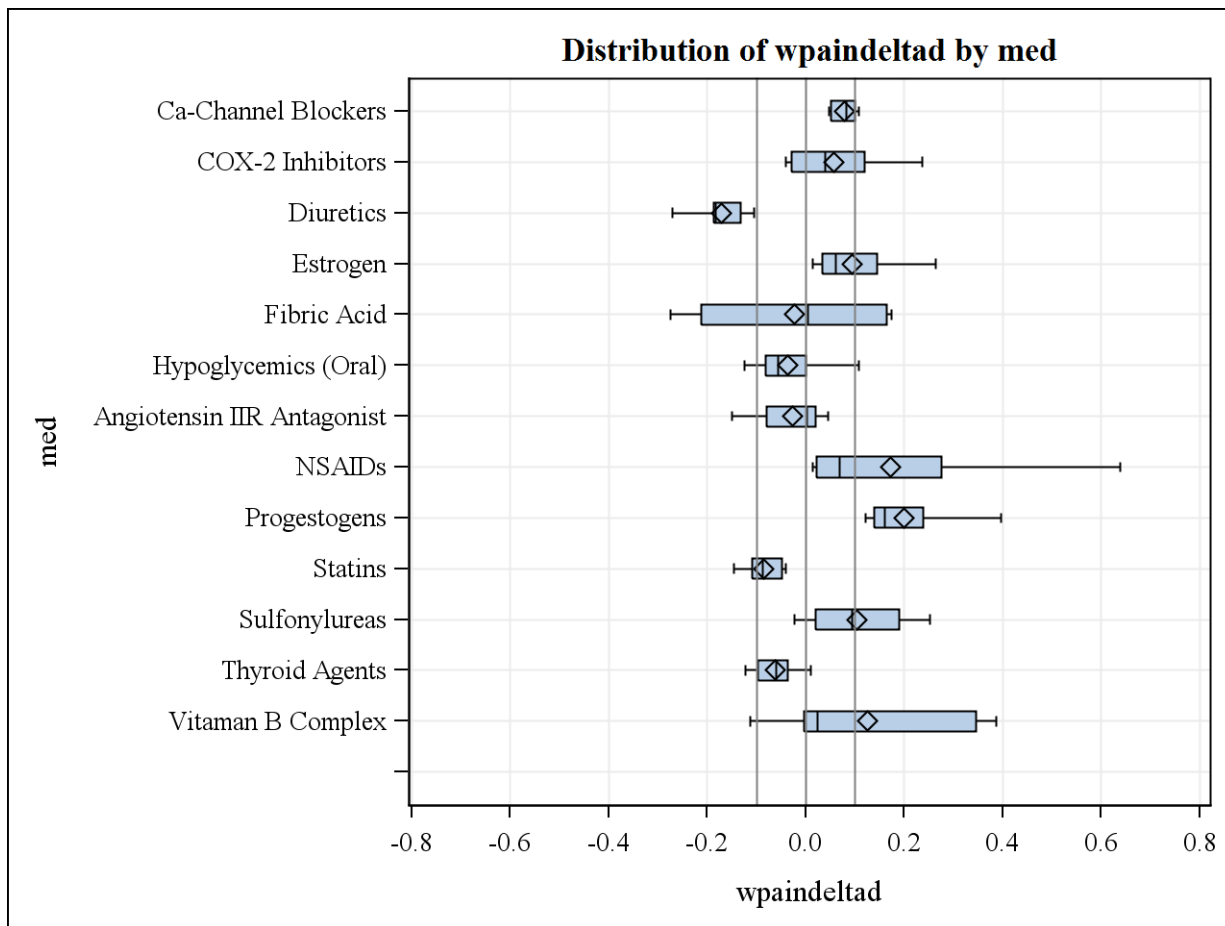

**Cohen Effect Size for JSW250 at 12 Months Among Medications (Left)**

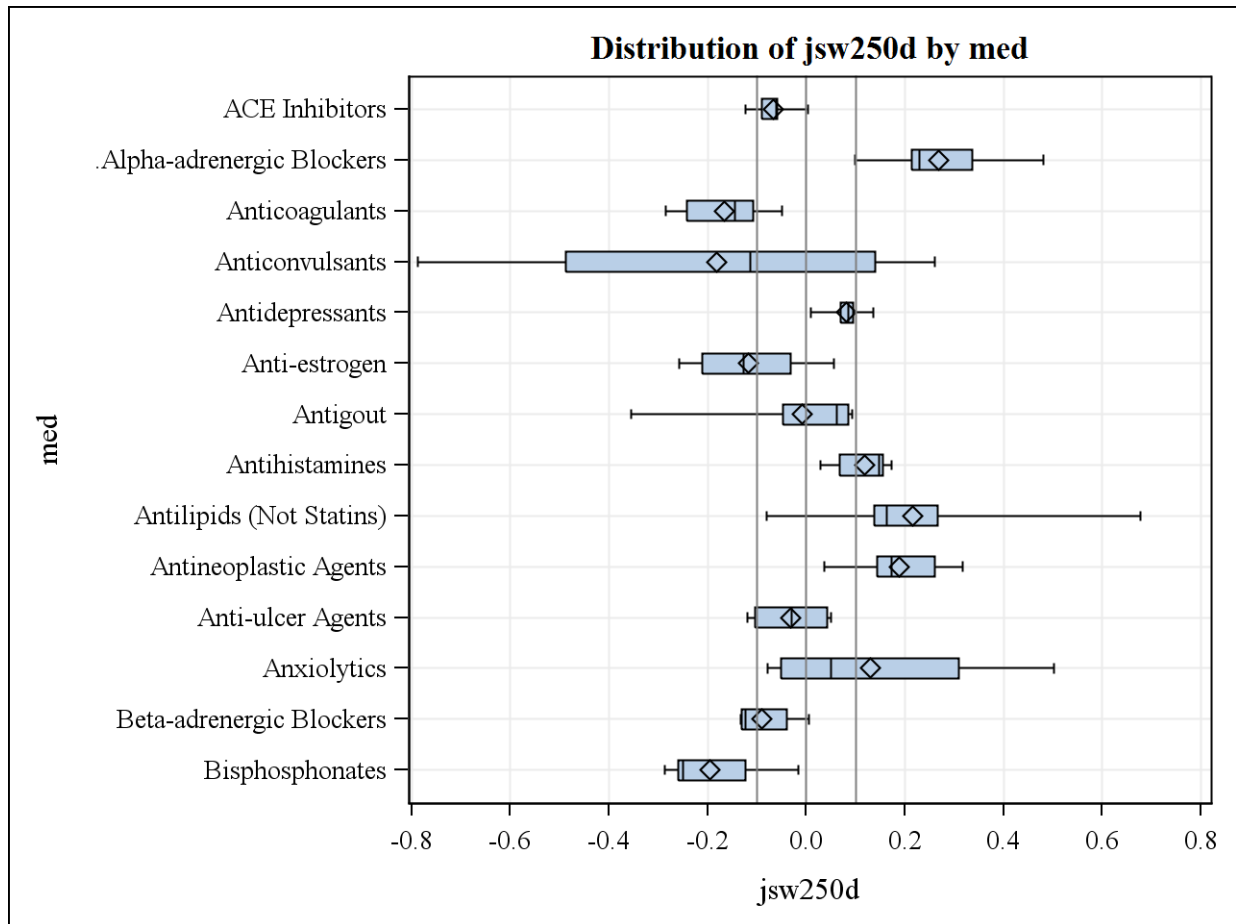

**Cohen Effect Size for JSW250 at 12 Months Among Medications (Left)**

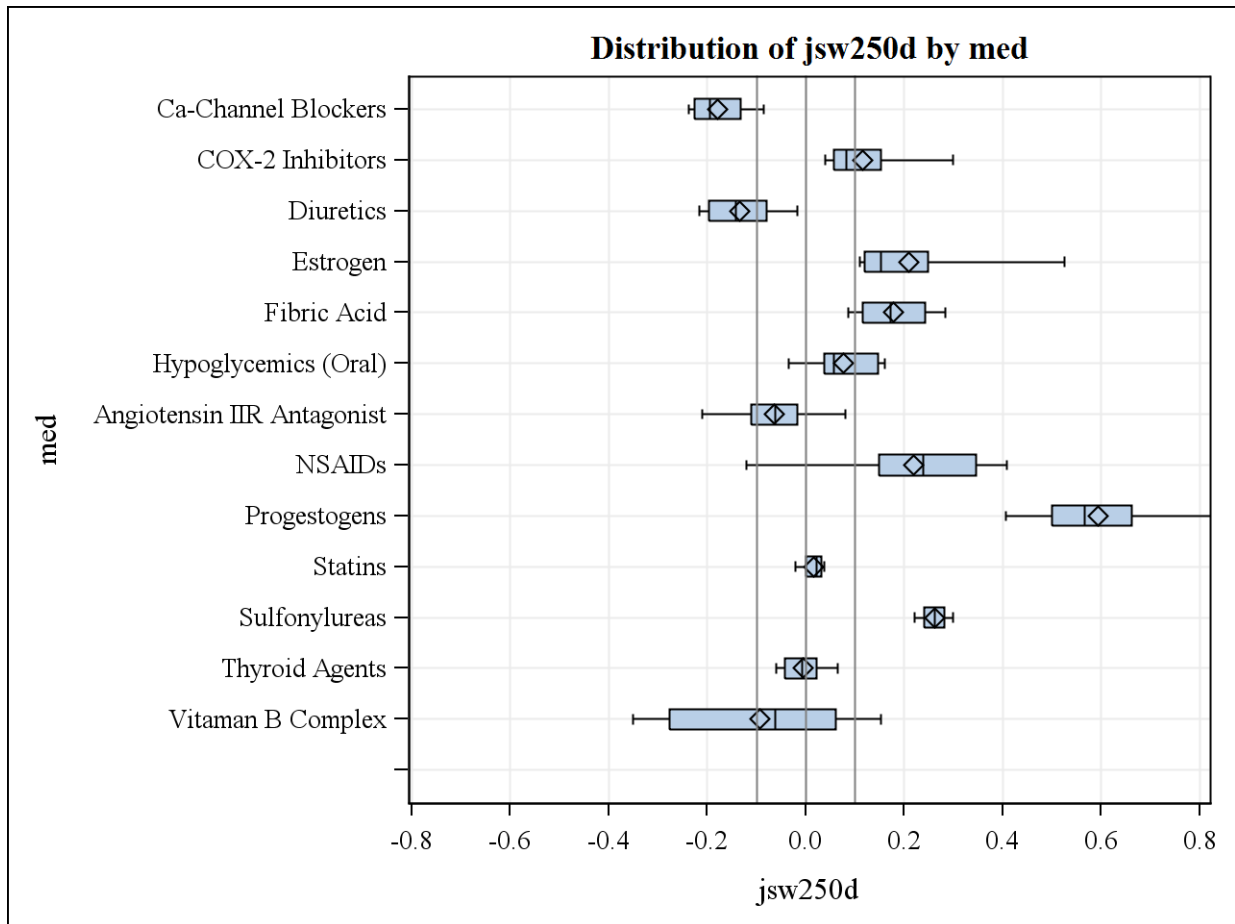

*Cohen Effect Size for JSW250 Change Among Medications (Left)*

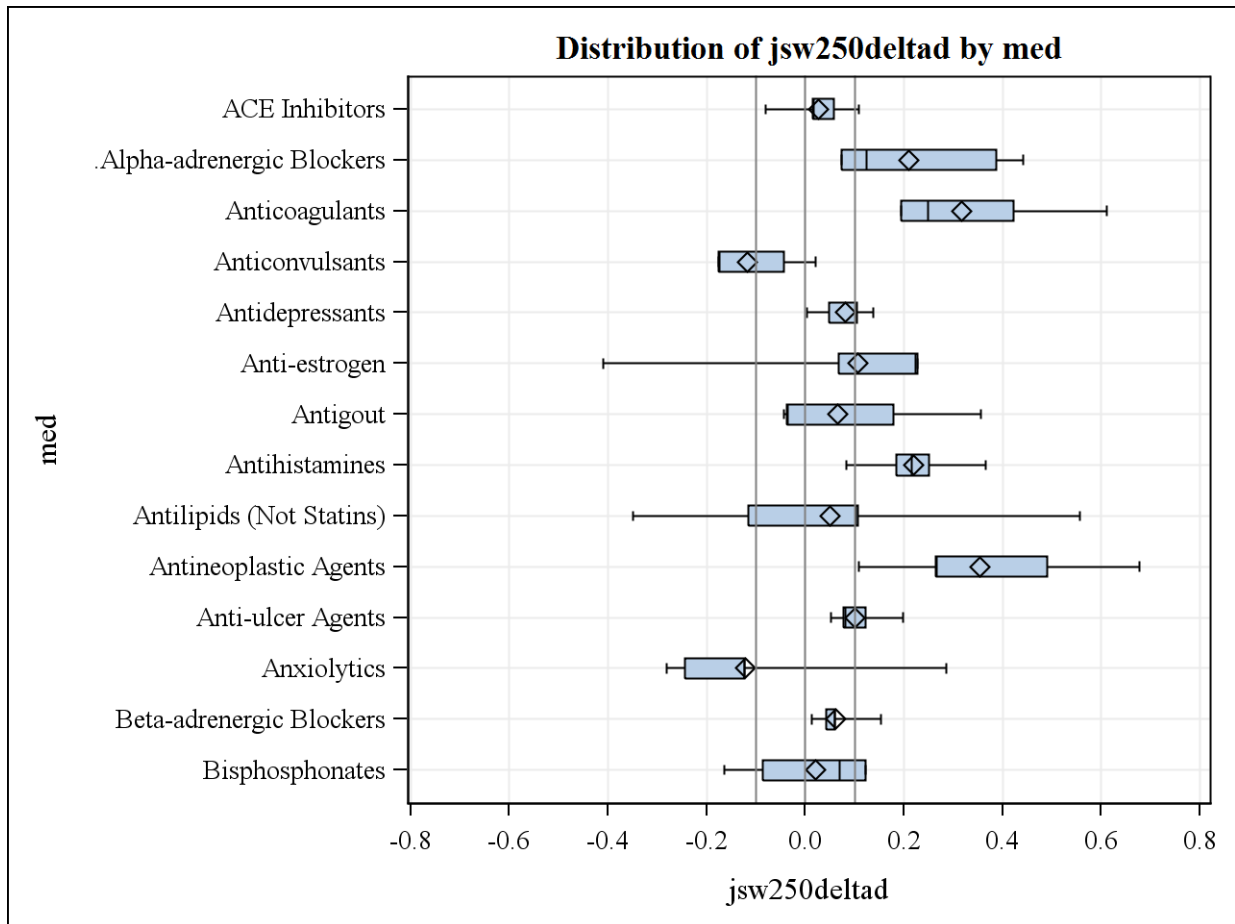

**Cohen Effect Size for JSW250 Change Among Medications (Left)**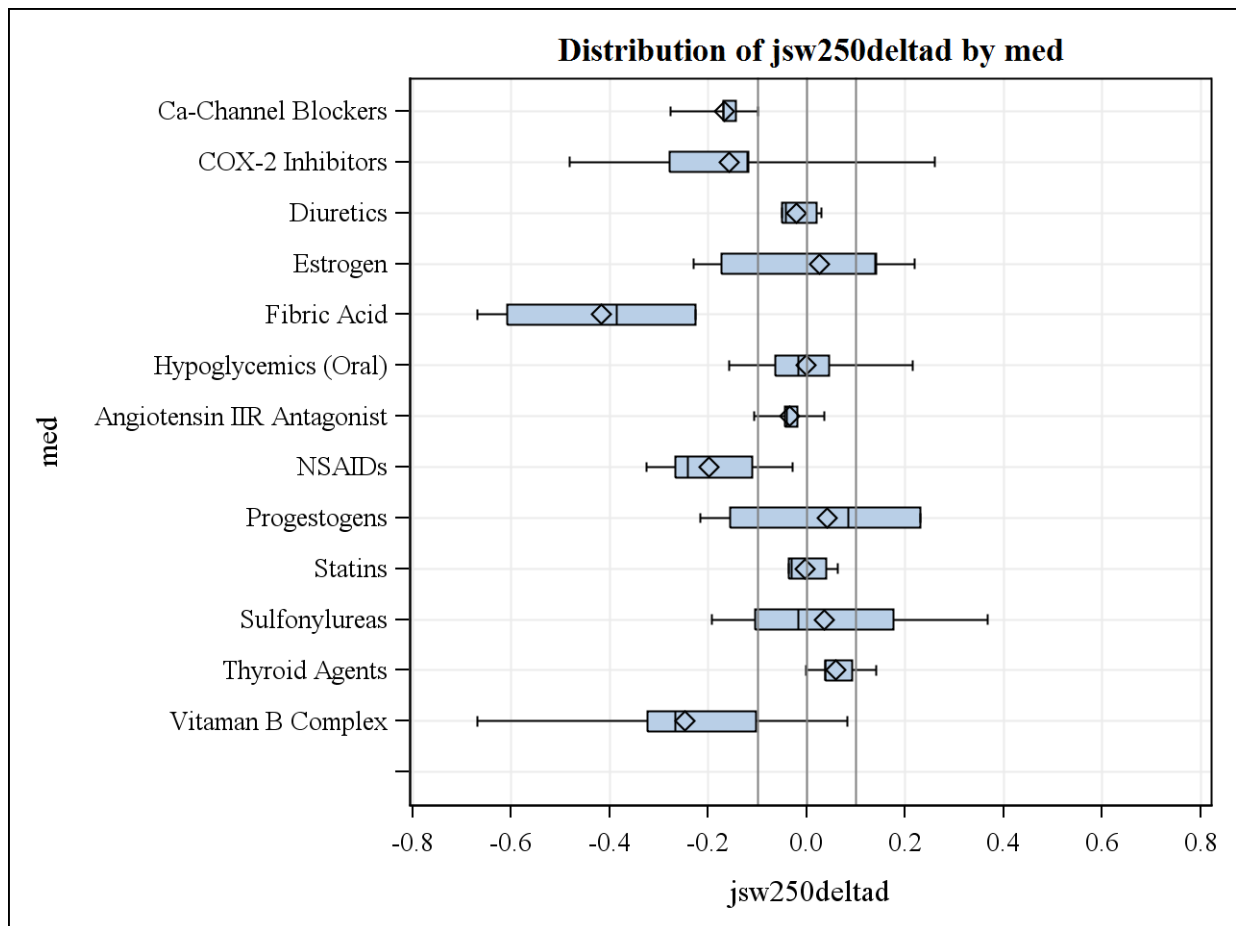

***Cohen Effect Size for WOMAC Pain at 12 Months Among Medications (Left)***

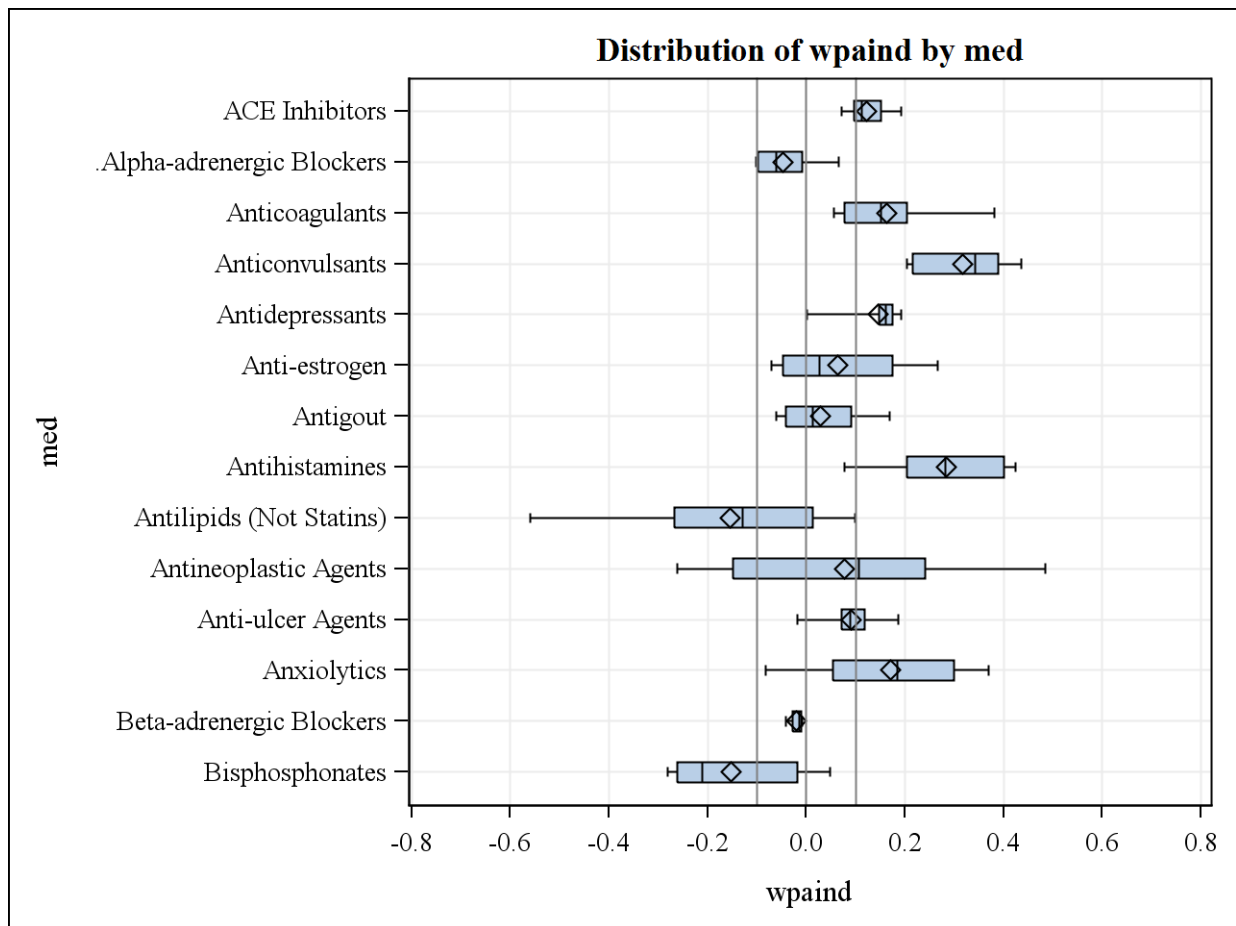

***Cohen Effect Size for WOMAC Pain at 12 Months Among Medications (Left)***

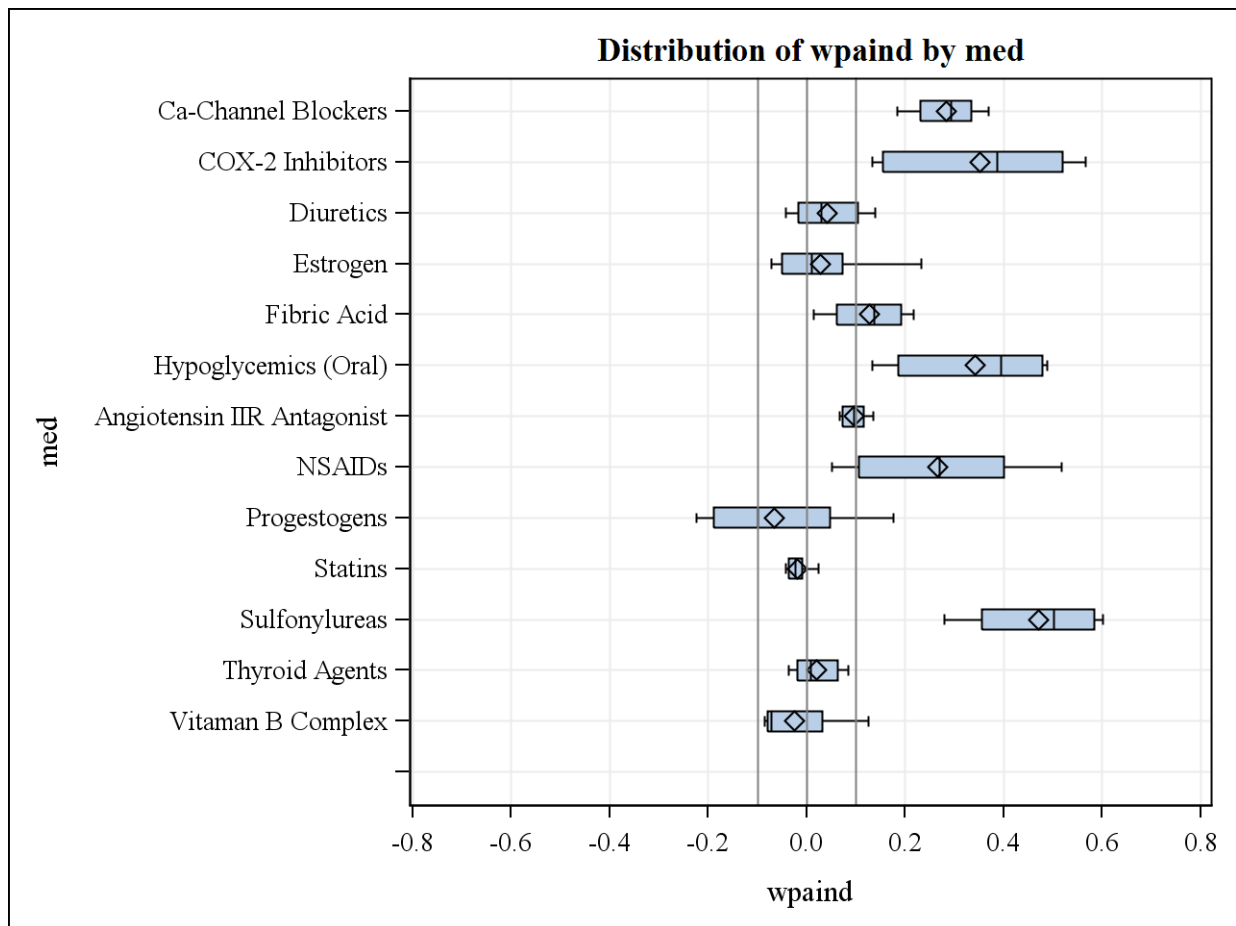

*Cohen Effect Size for WOMAC Pain Change Among Medications (Left)*

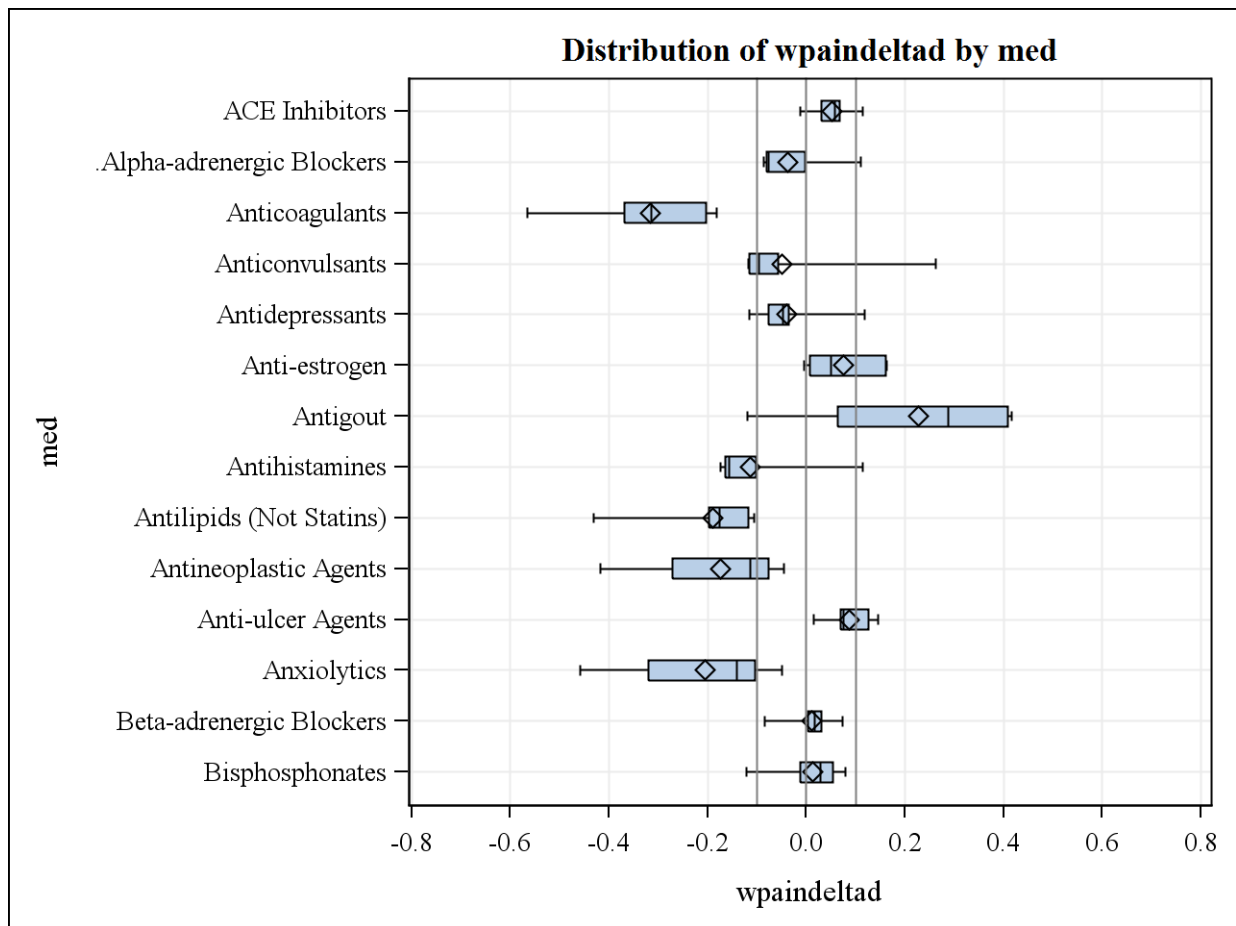



**Cohen Effect Size for WOMAC Pain Change Among Medications (Left)**

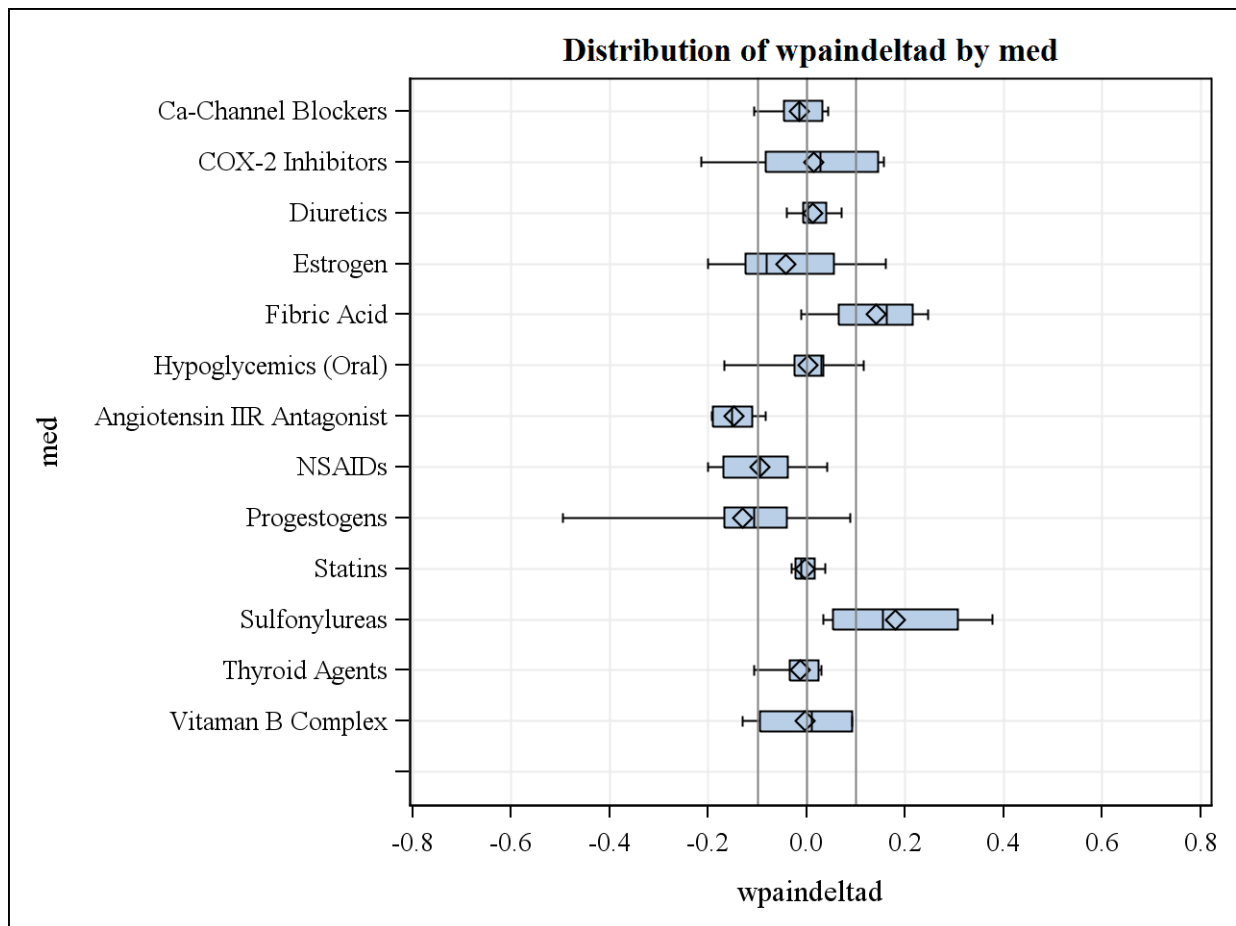

*aceinhibit - JSW250 Change (Right Knee)*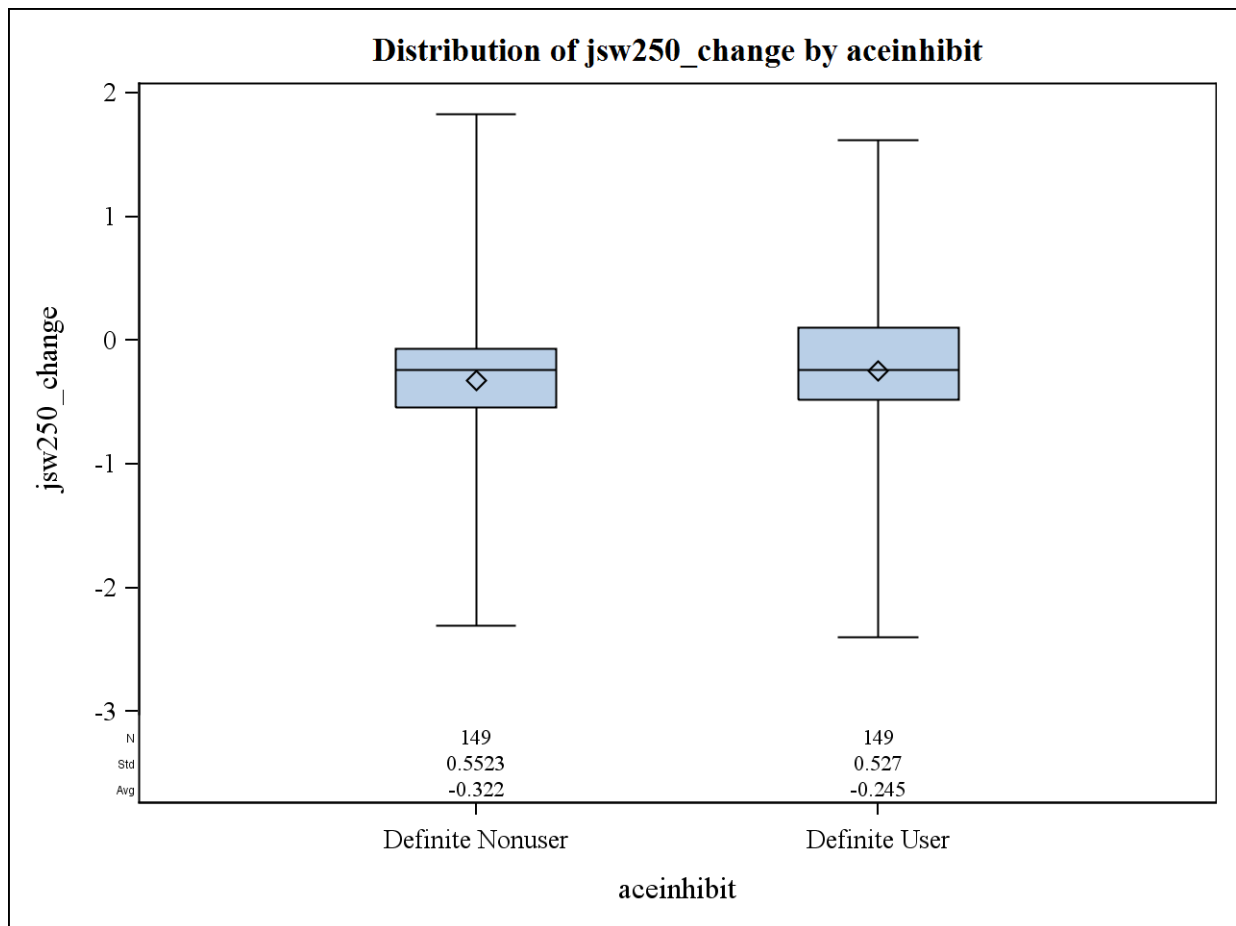

*aceinhibit - JSW250 Change (Left Knee)*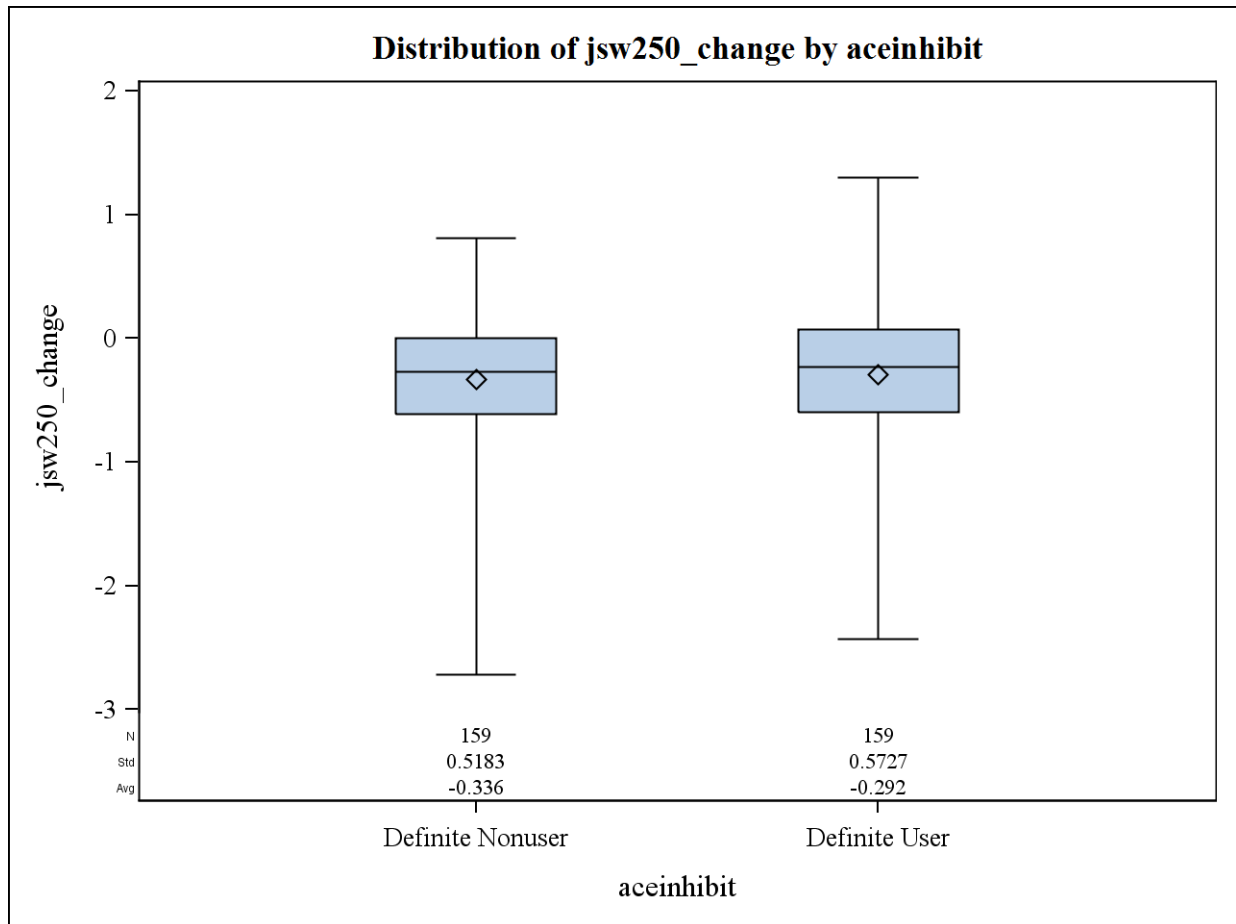

*alphaadrenblock - JSW250 Change (Right Knee)*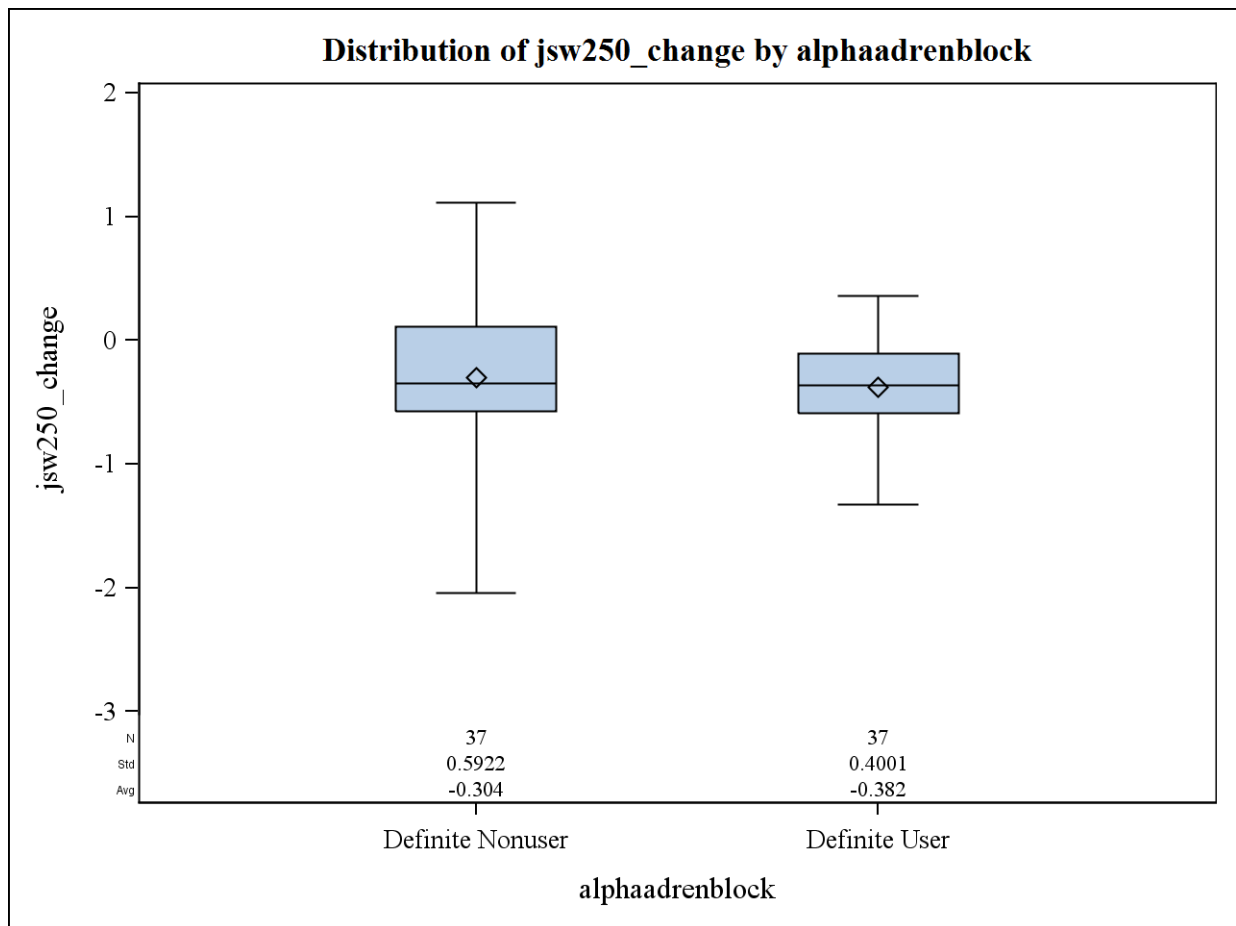

*alphaadrenblock - JSW250 Change (Left Knee)*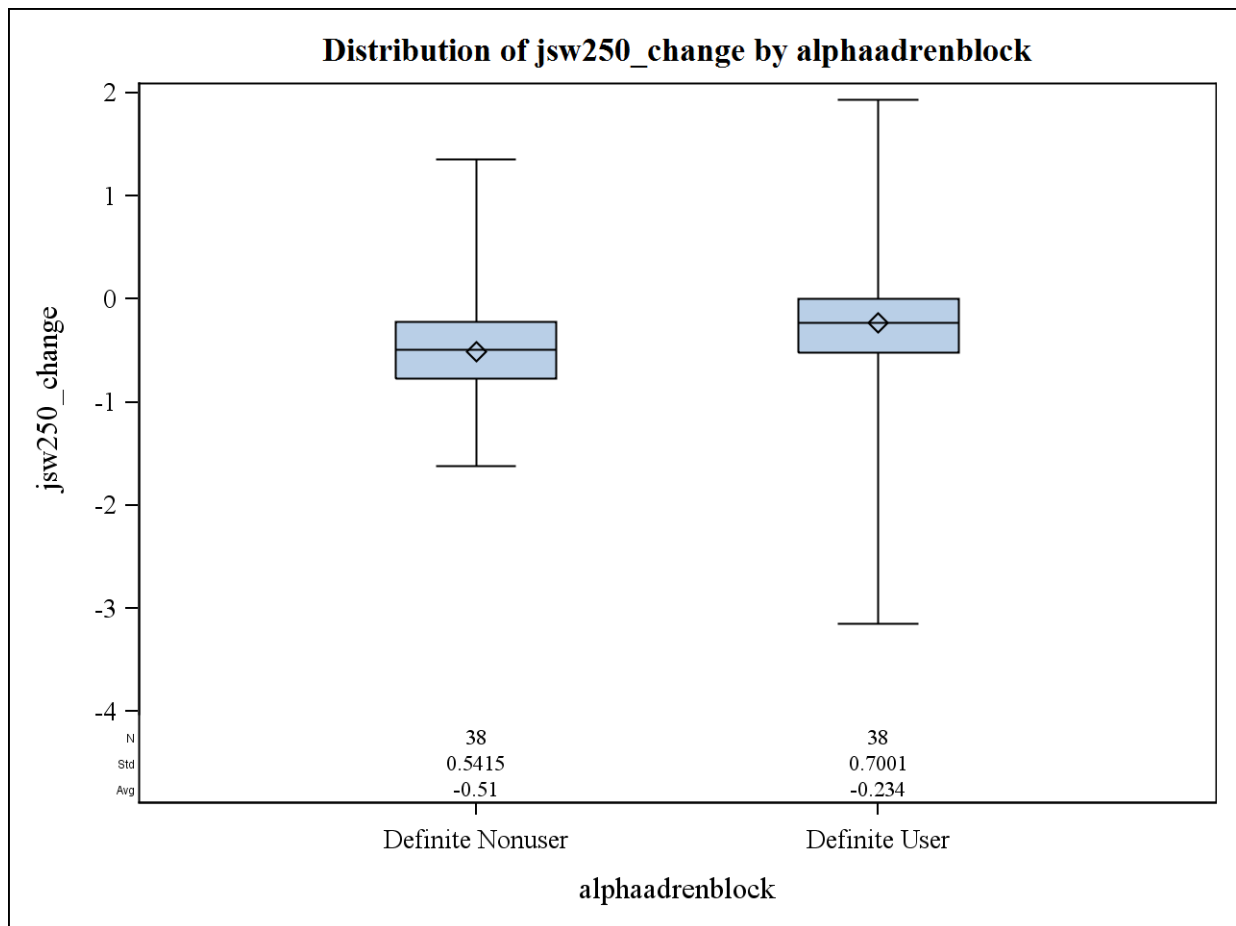

*anticoagulant - JSW250 Change (Right Knee)*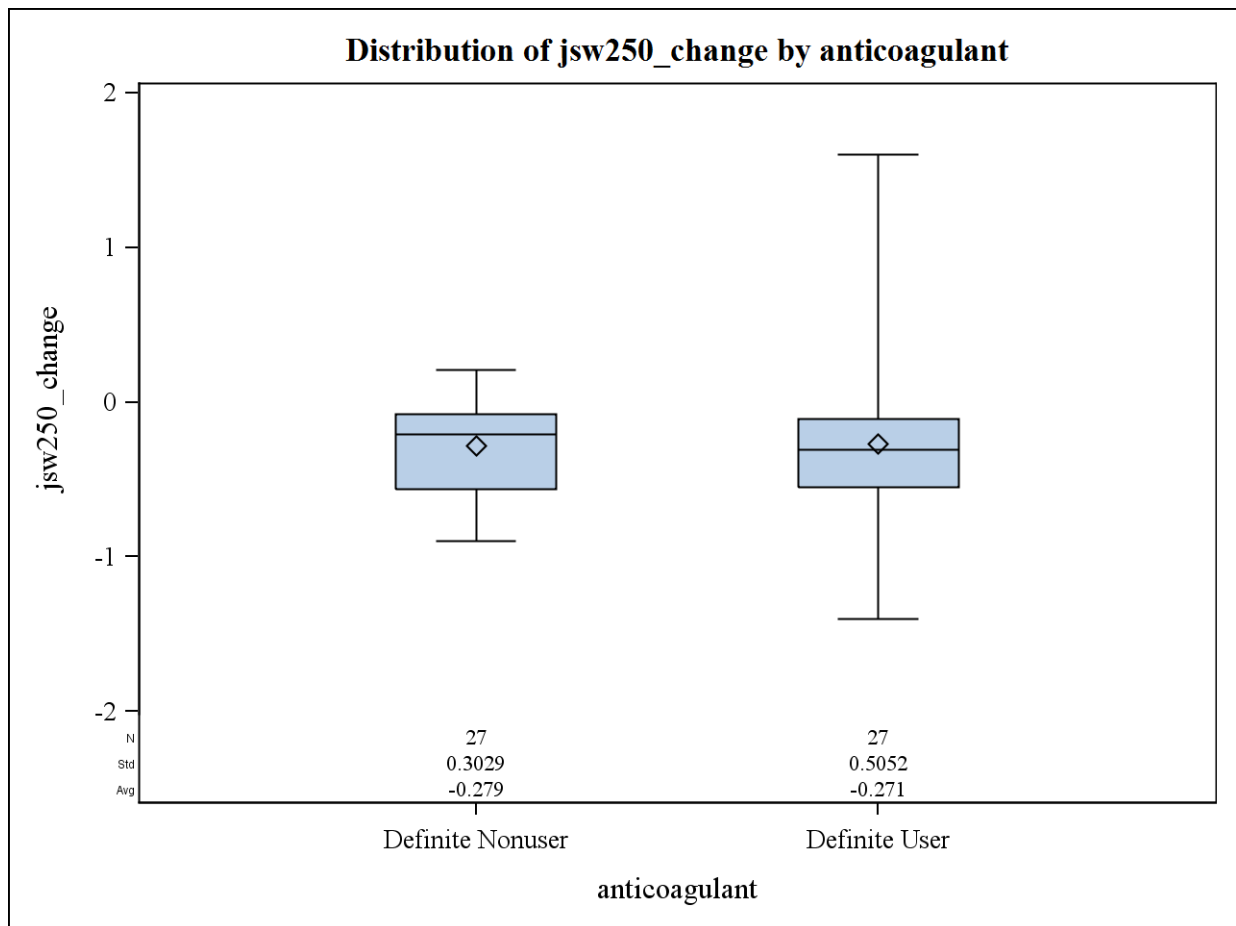

*anticoagulant - JSW250 Change (Left Knee)*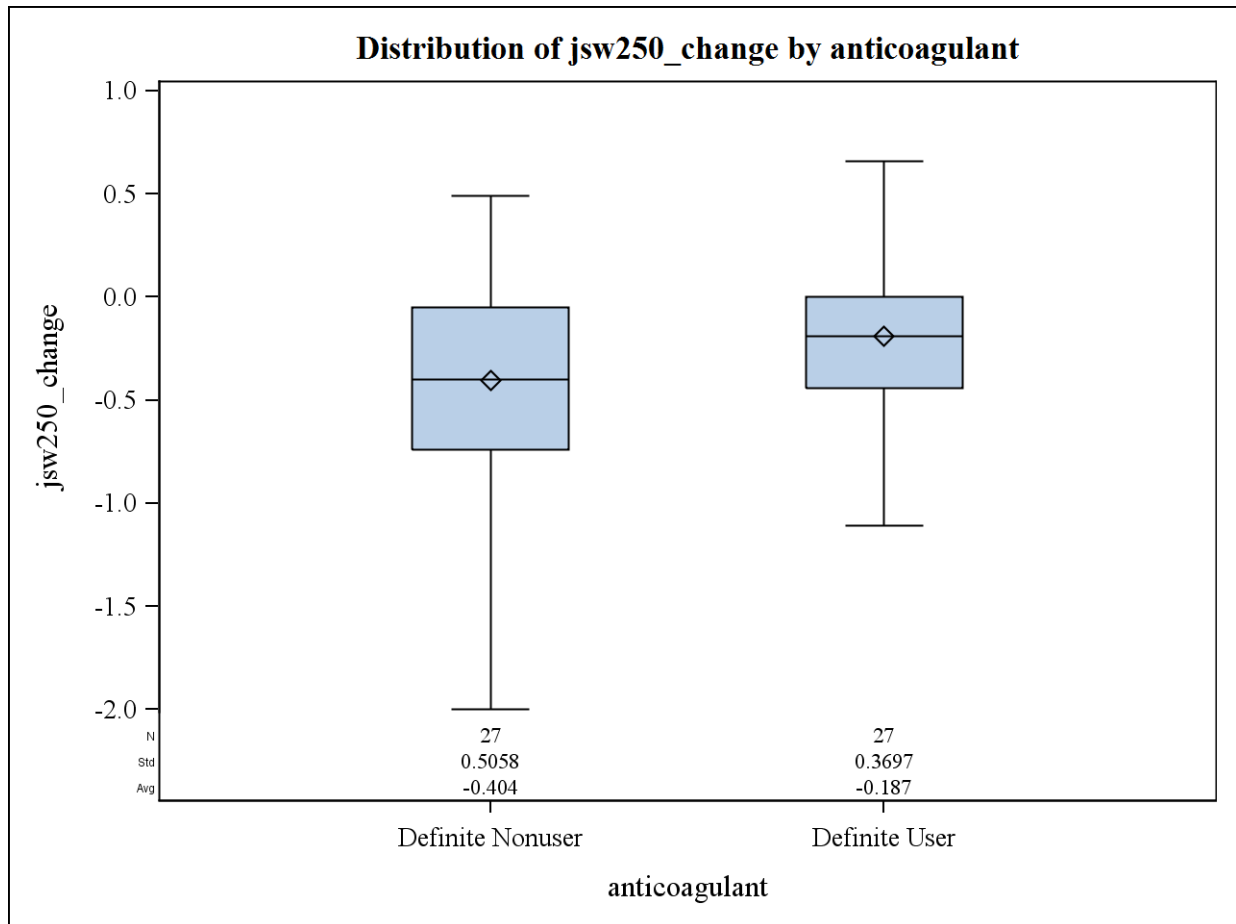

*anticonvuls - JSW250 Change (Right Knee)*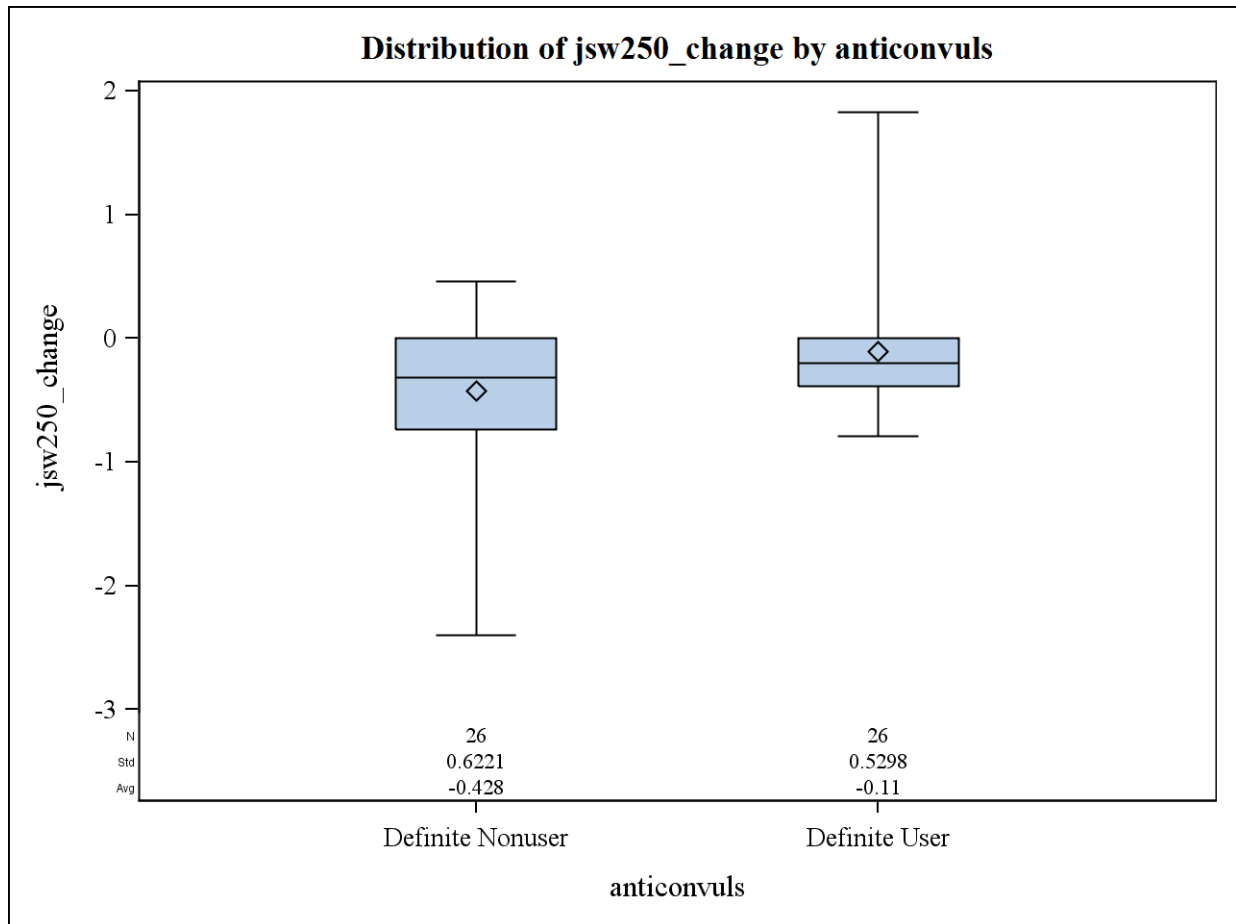



*anticonvuls - JSW250 Change (Left Knee)*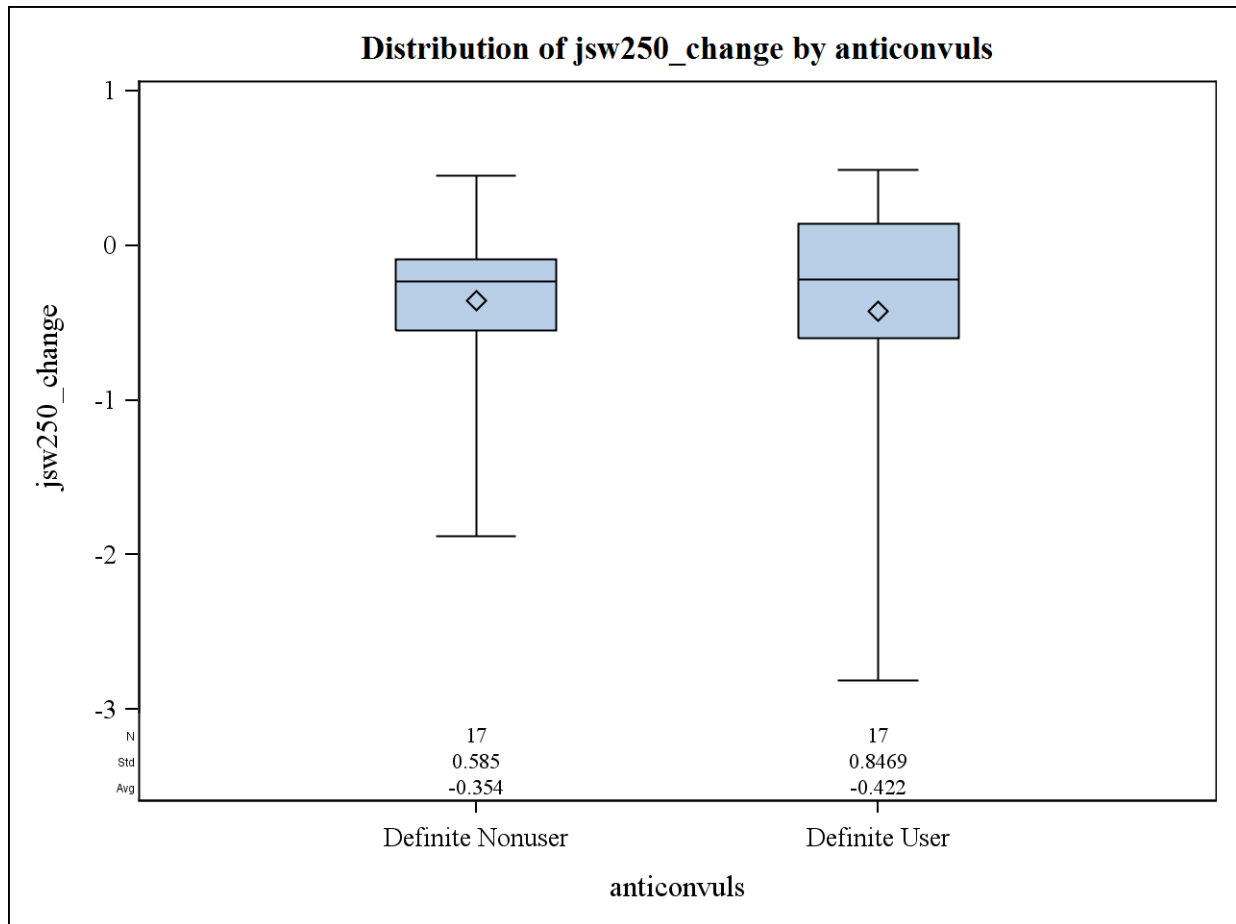

*antidepress - JSW250 Change (Right Knee)*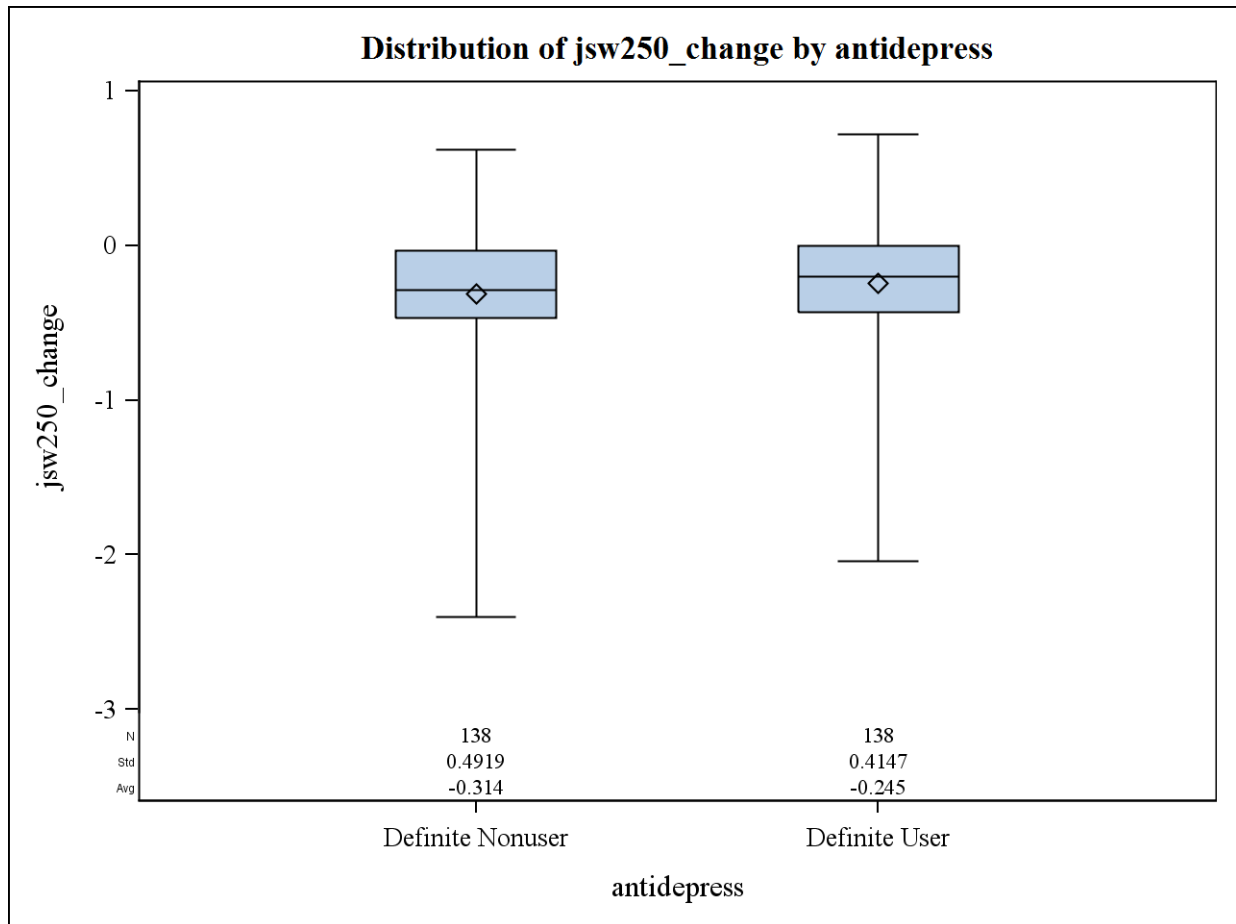

*antidepress - JSW250 Change (Left Knee)*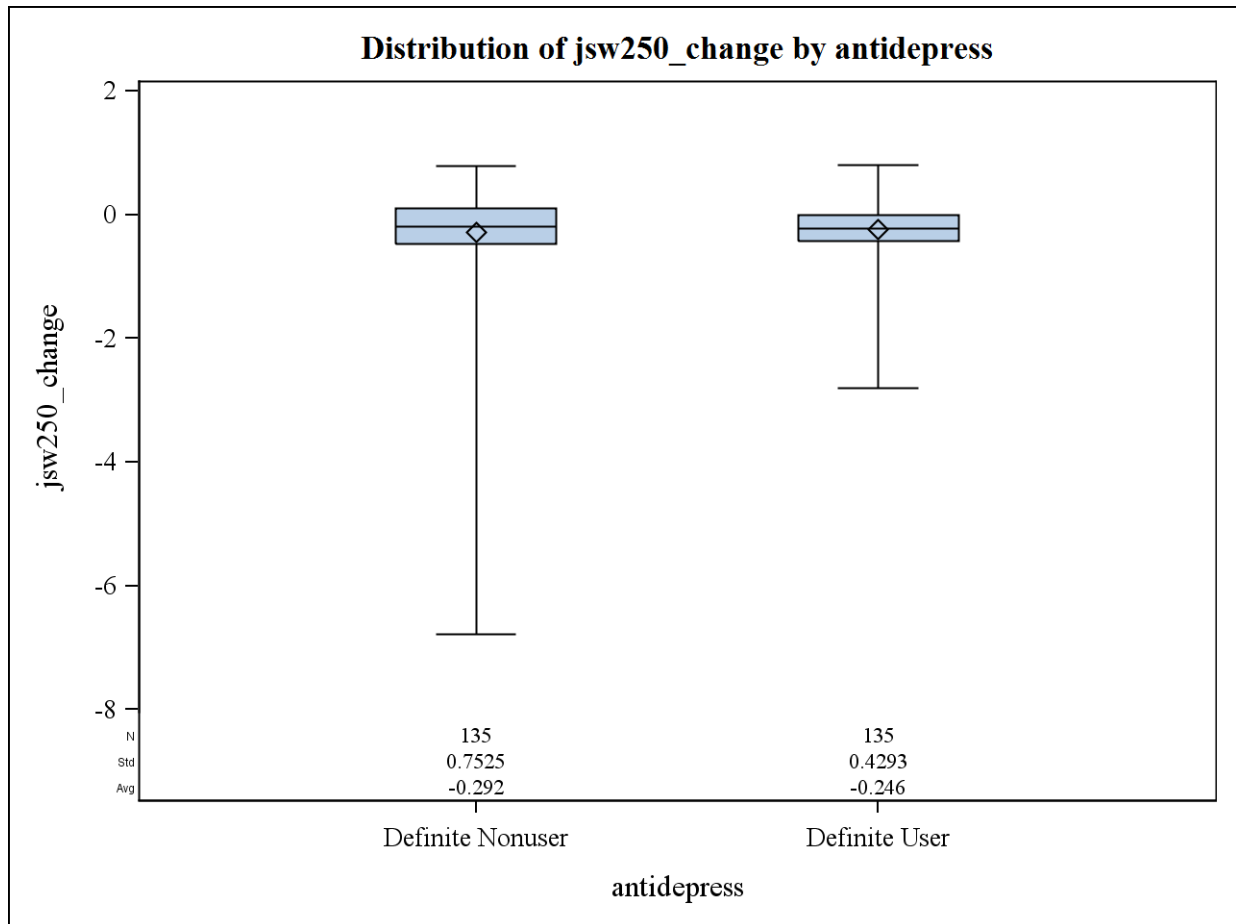

*antiestrogen - JSW250 Change (Right Knee)*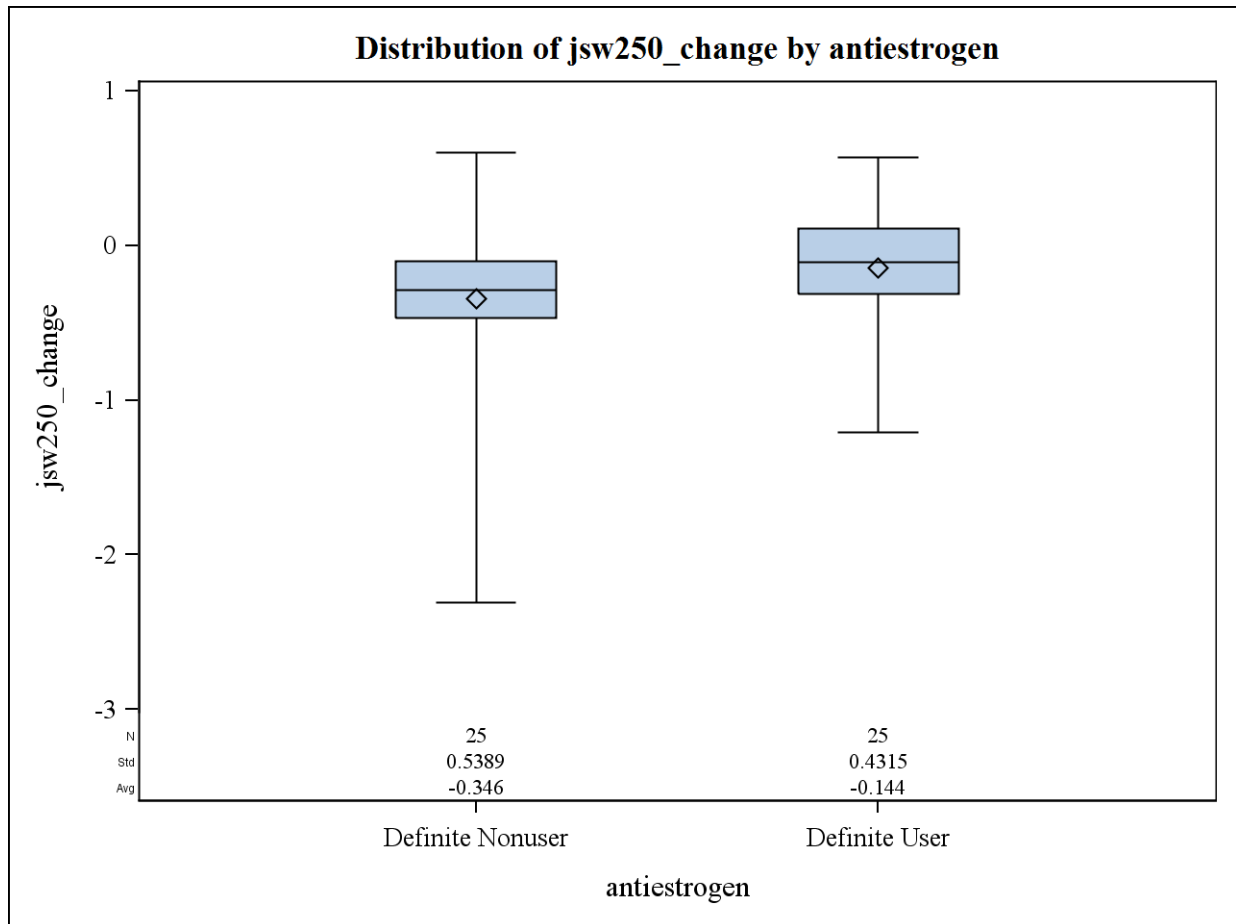

*antiestrogen - JSW250 Change (Left Knee)*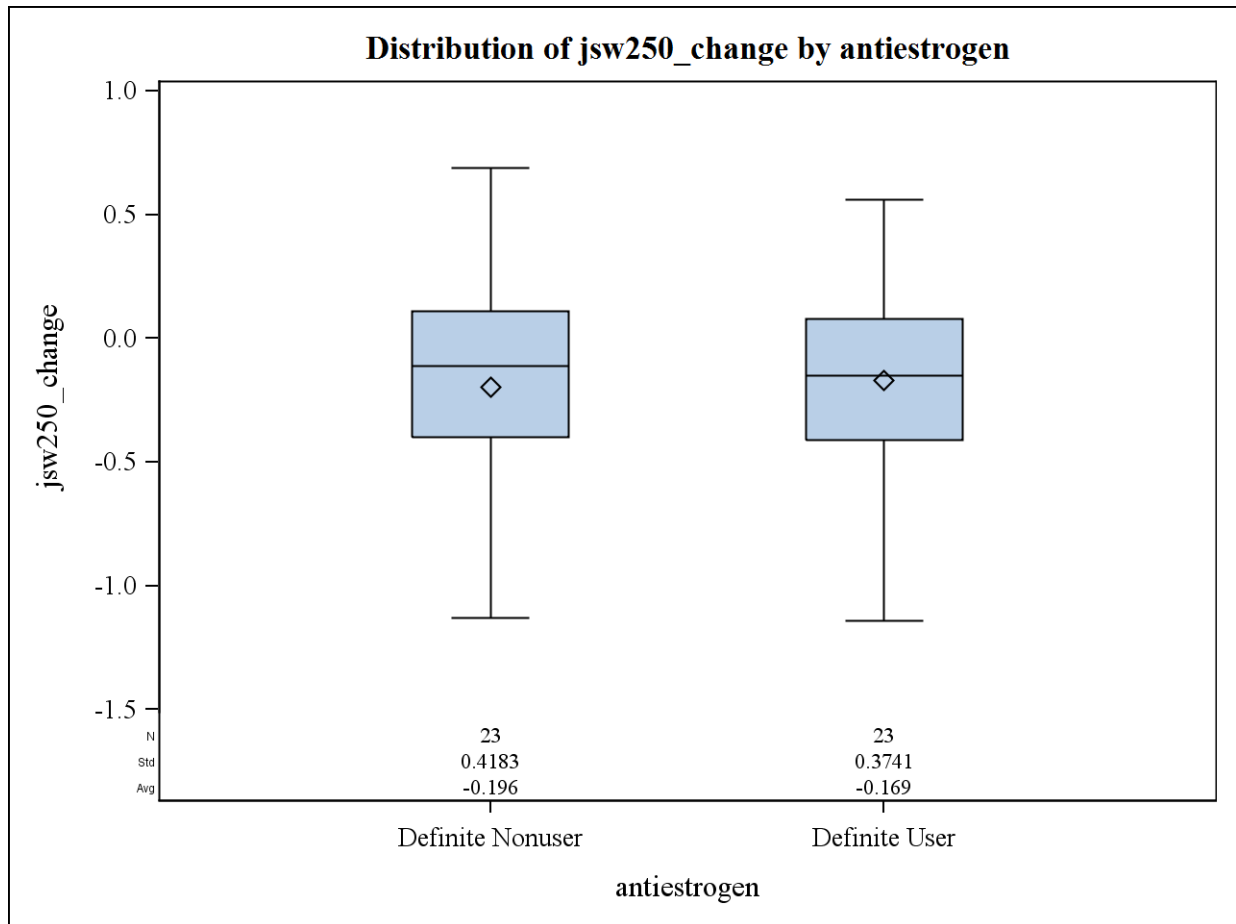

*Antihistam - JSW250 Change (Right Knee)*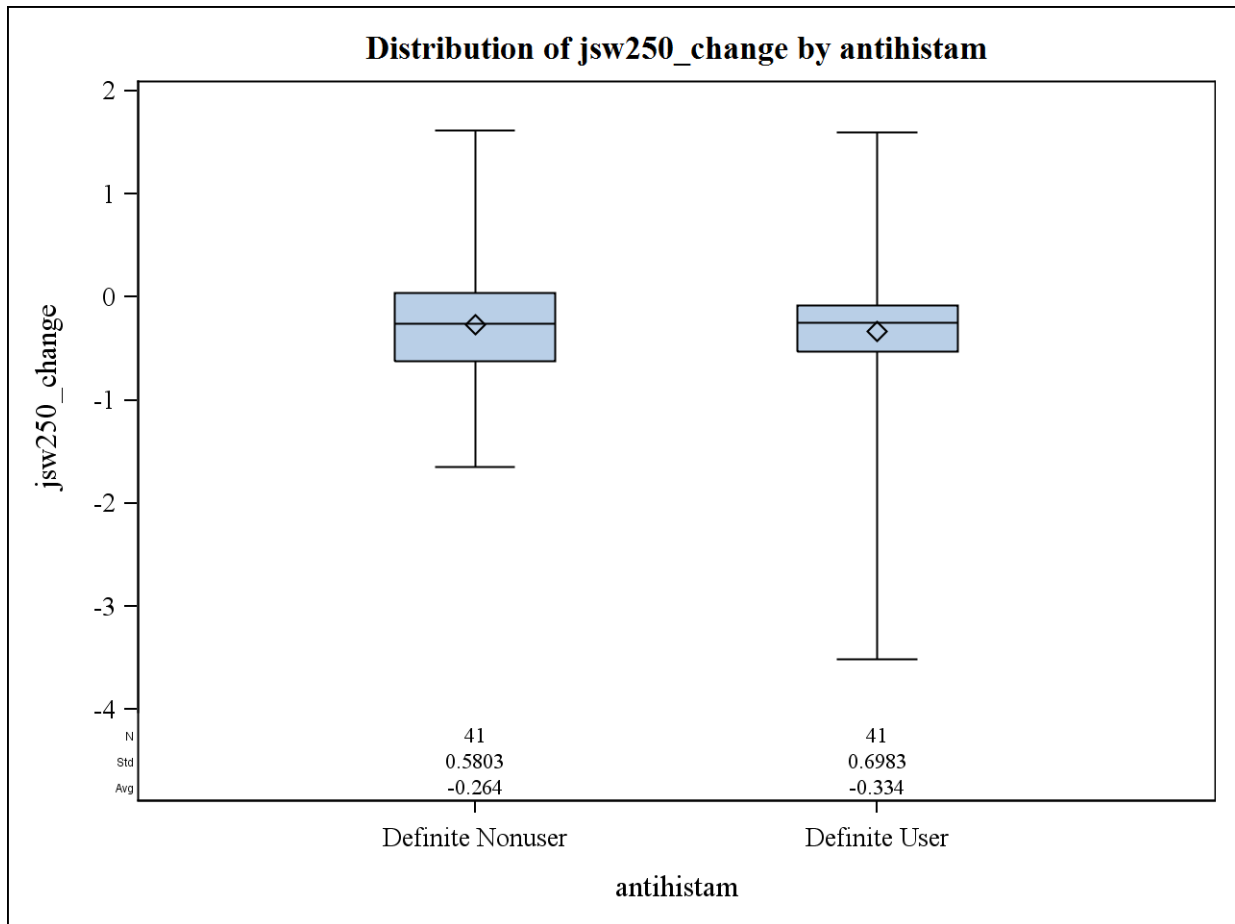

*Antihistam - JSW250 Change (Left Knee)*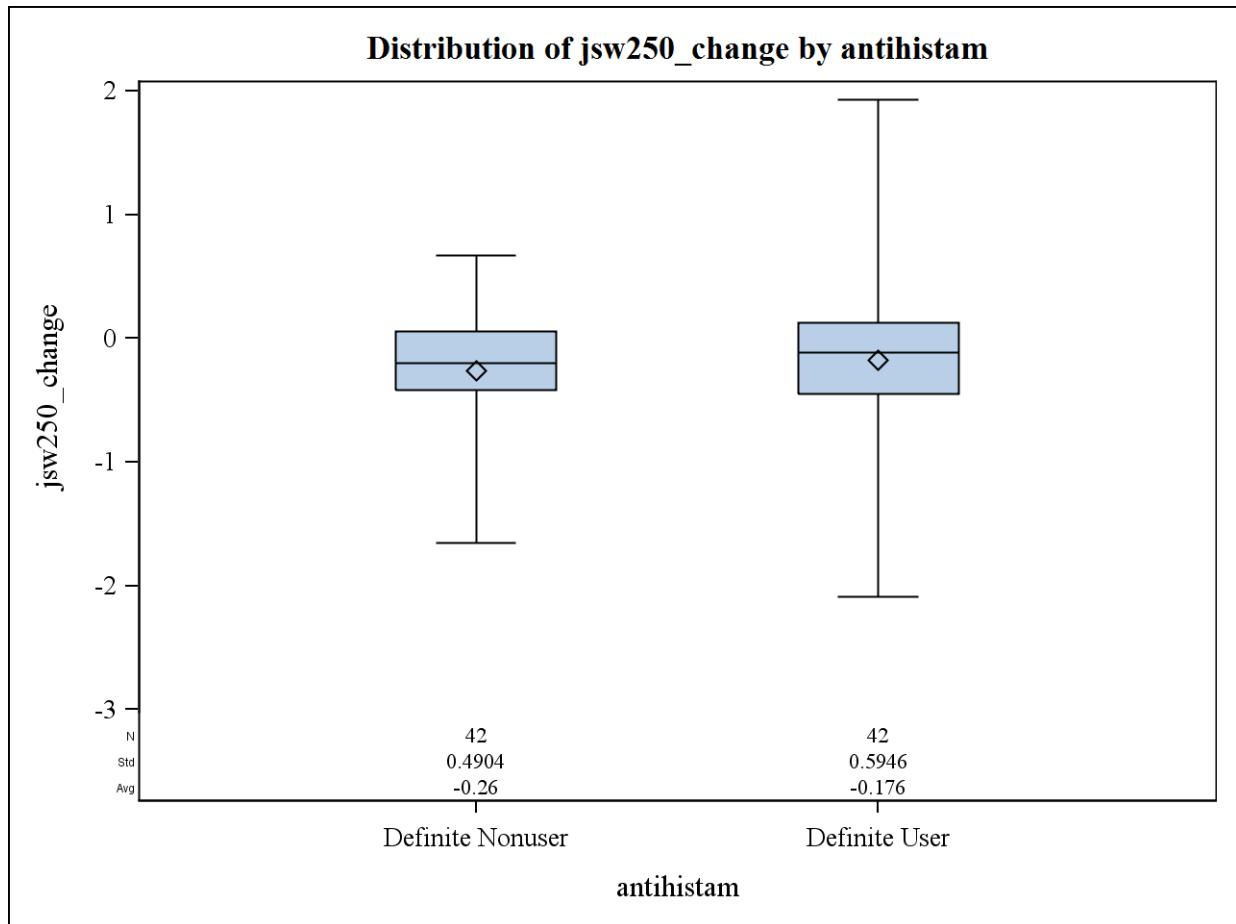

*Antilipemicr - JSW250 Change (Right Knee)*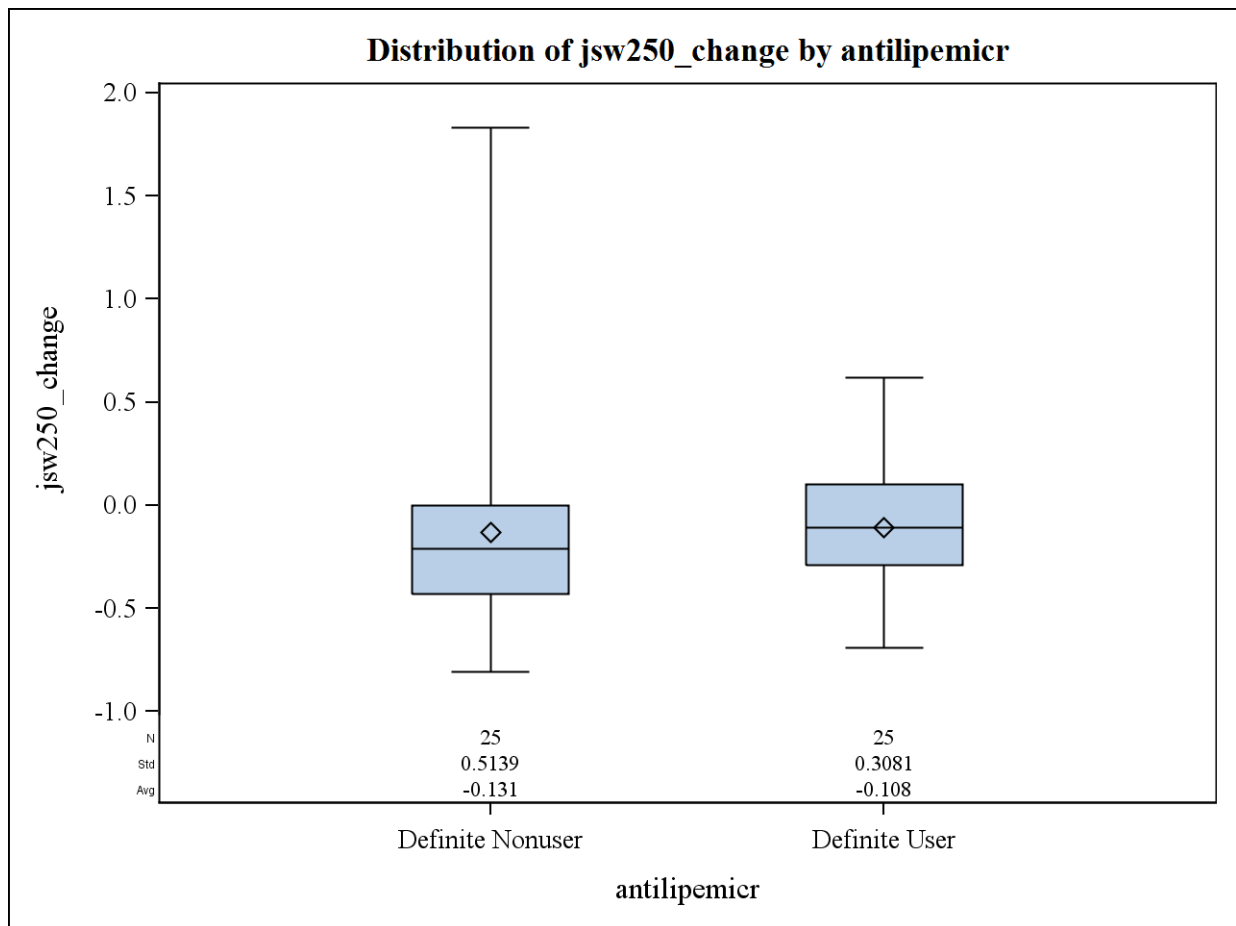



*Antilipemicr - JSW250 Change (Left Knee)*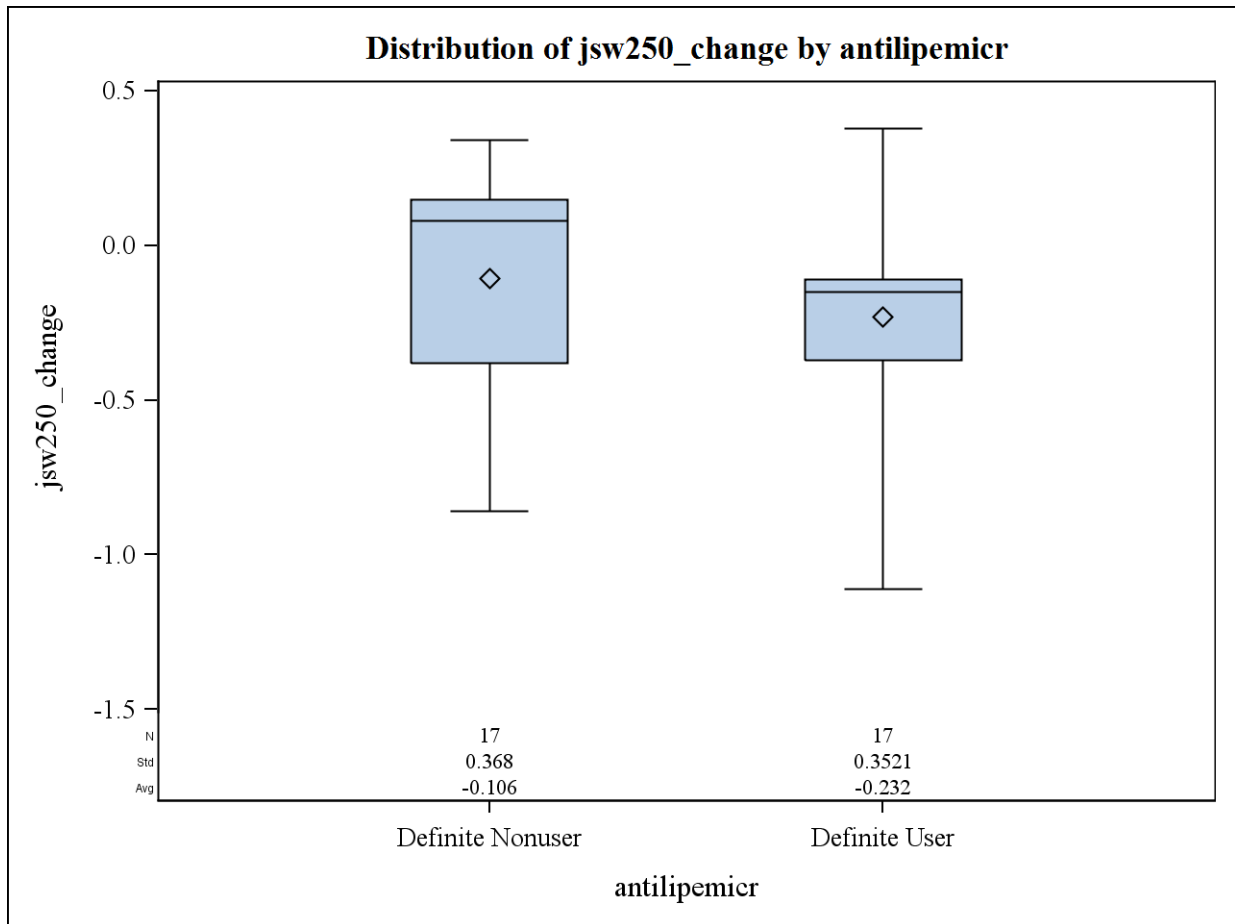

*antineoplast - JSW250 Change (Right Knee)*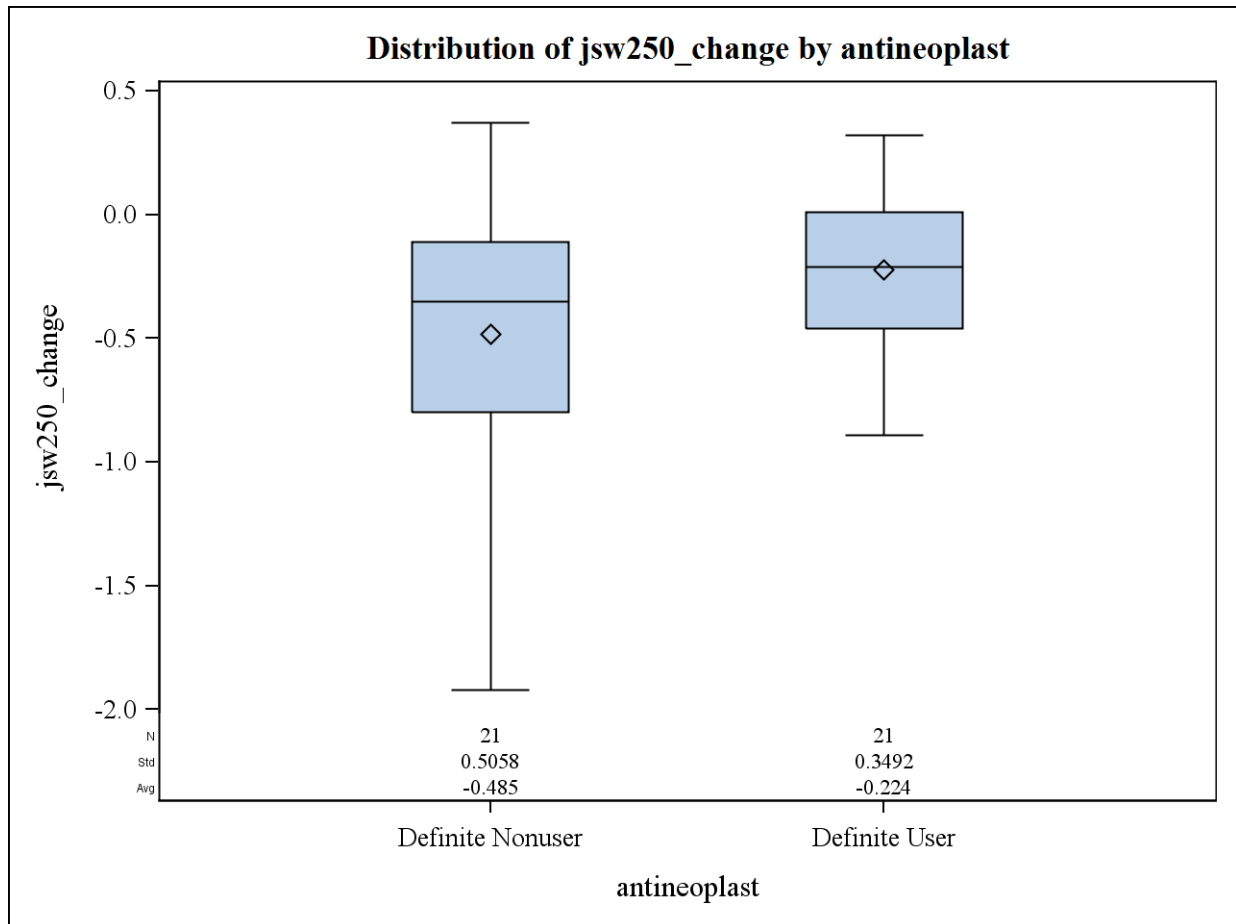

*antineoplast - JSW250 Change (Left Knee)*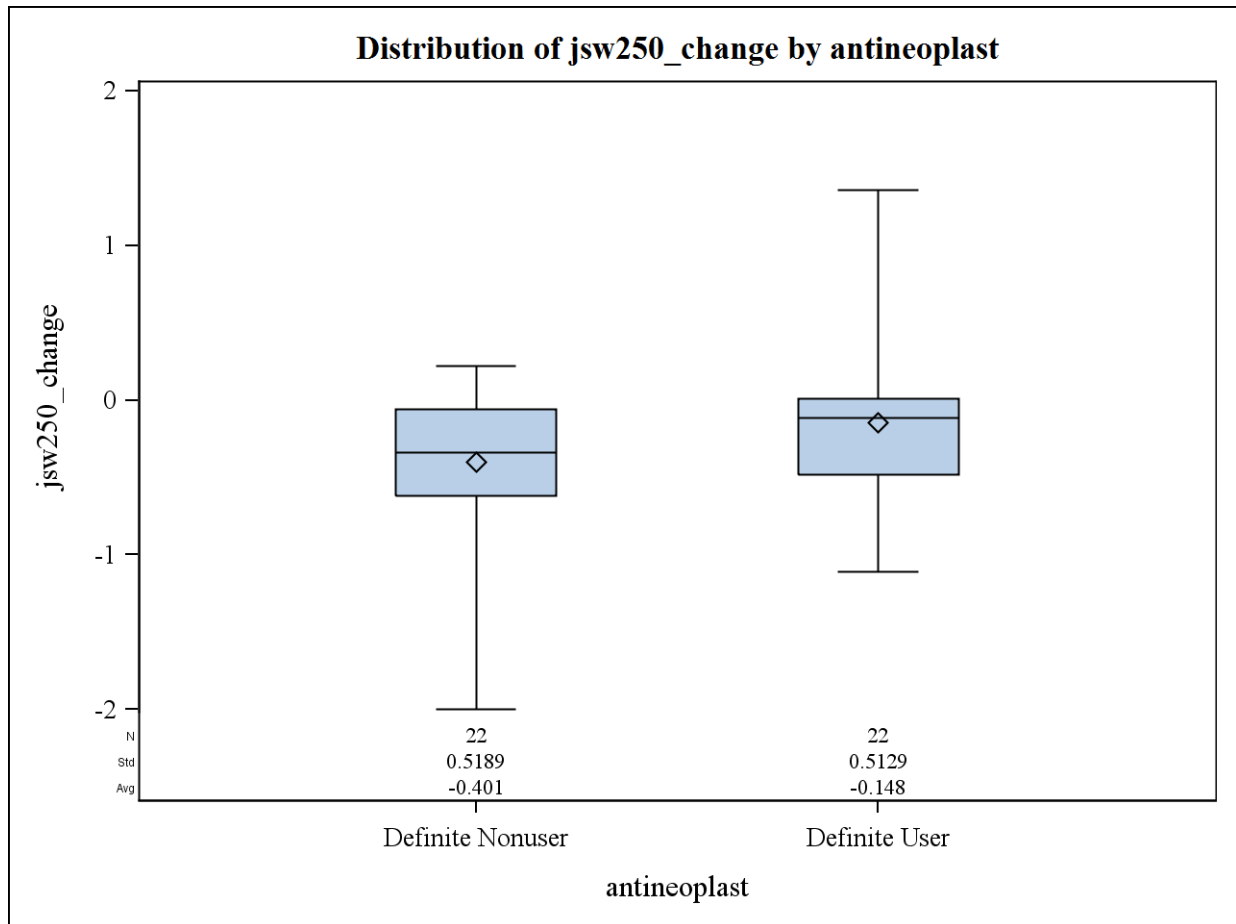

*estrogen - JSW250 Change (Right Knee)*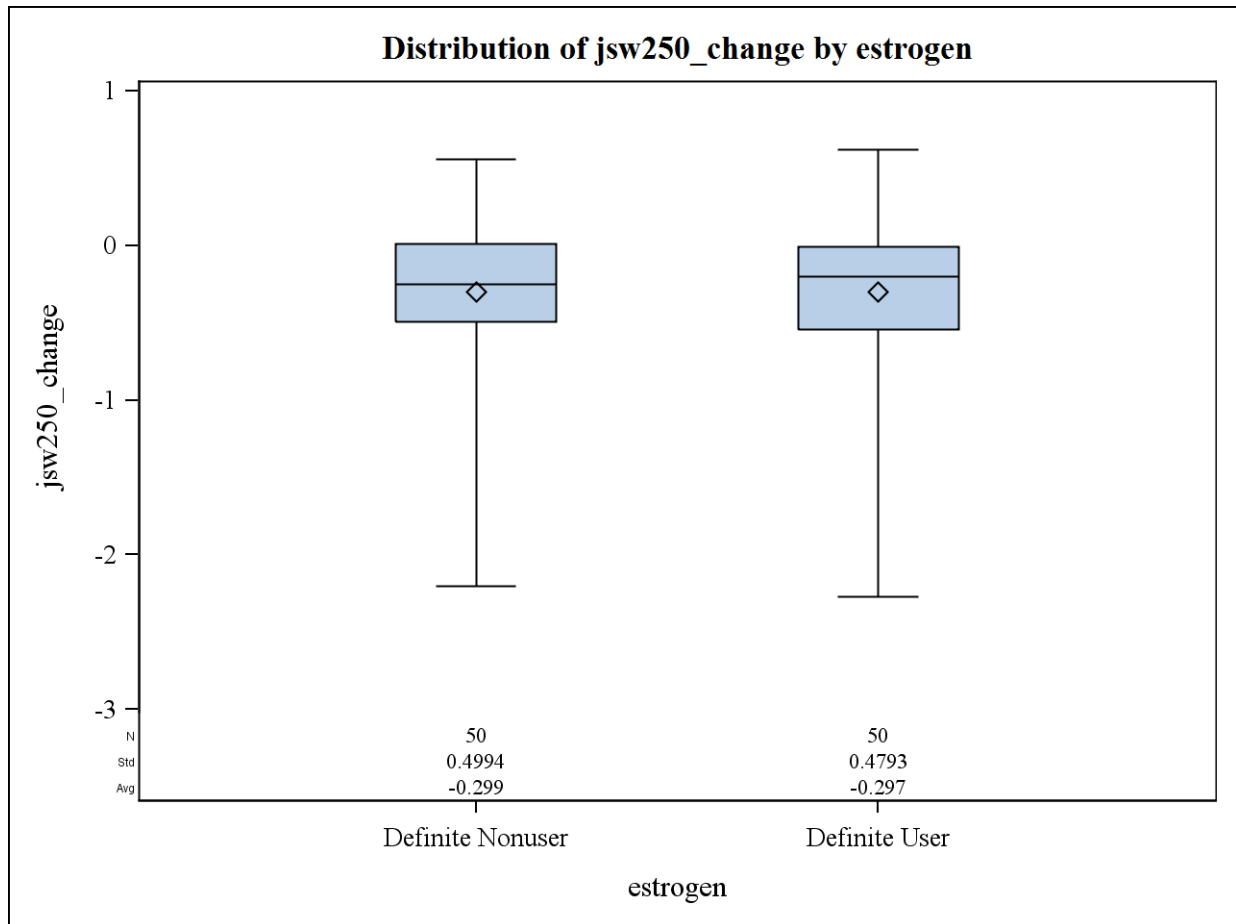

*estrogen - JSW250 Change (Left Knee)*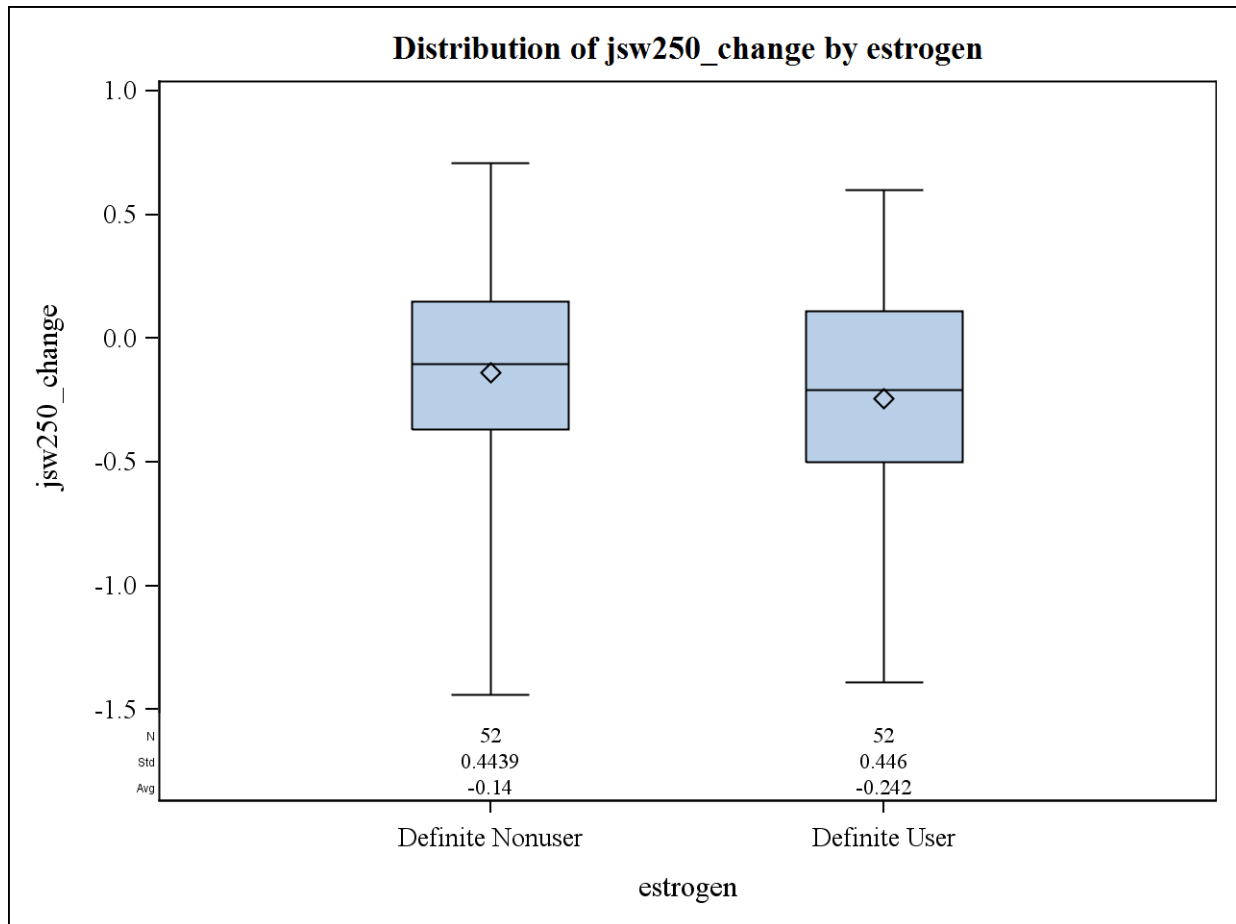

**Betaadrenblock - JSW250 Change (Right Knee)**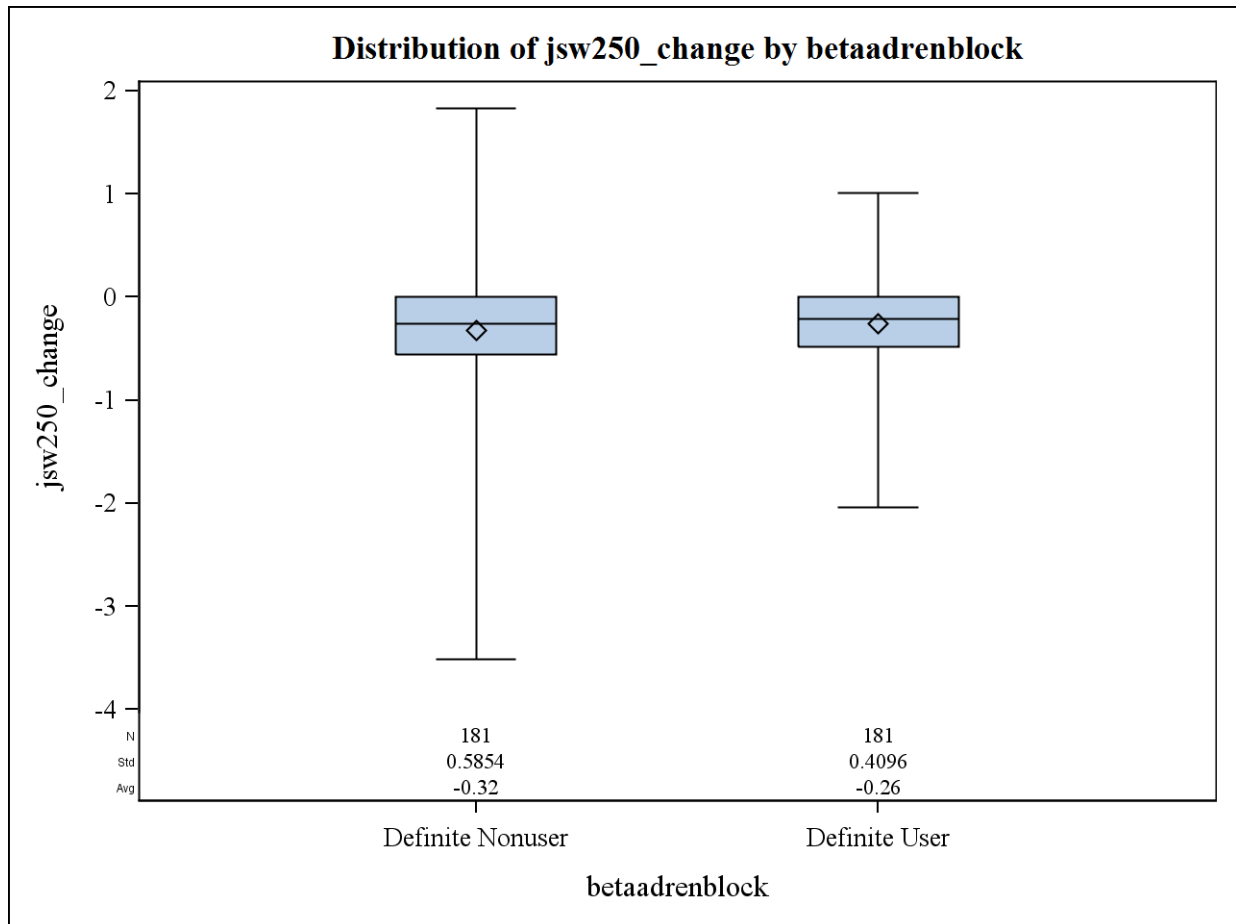

**Betaadrenblock - JSW250 Change (Left Knee)**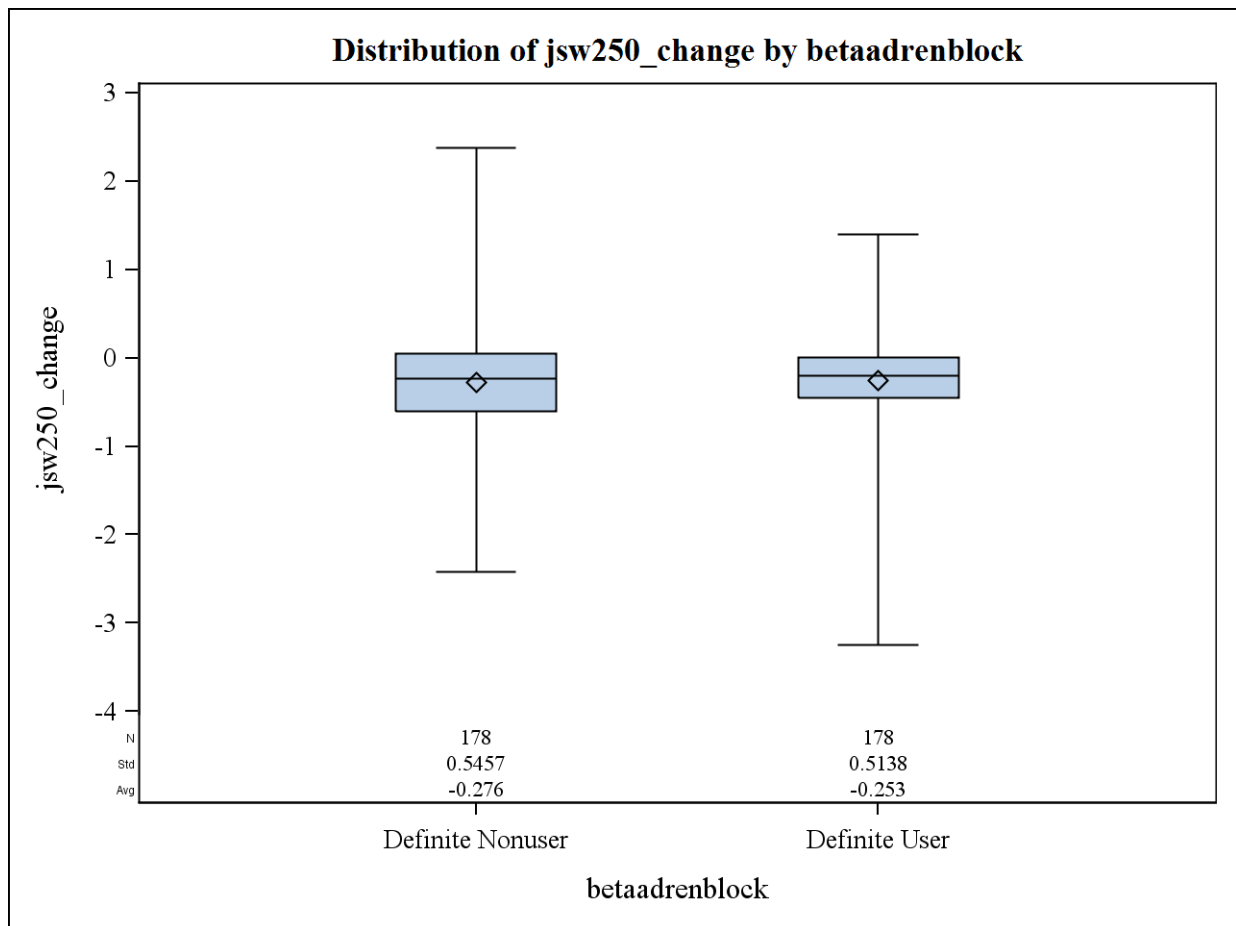

*thyroidagent - JSW250 Change (Right Knee)*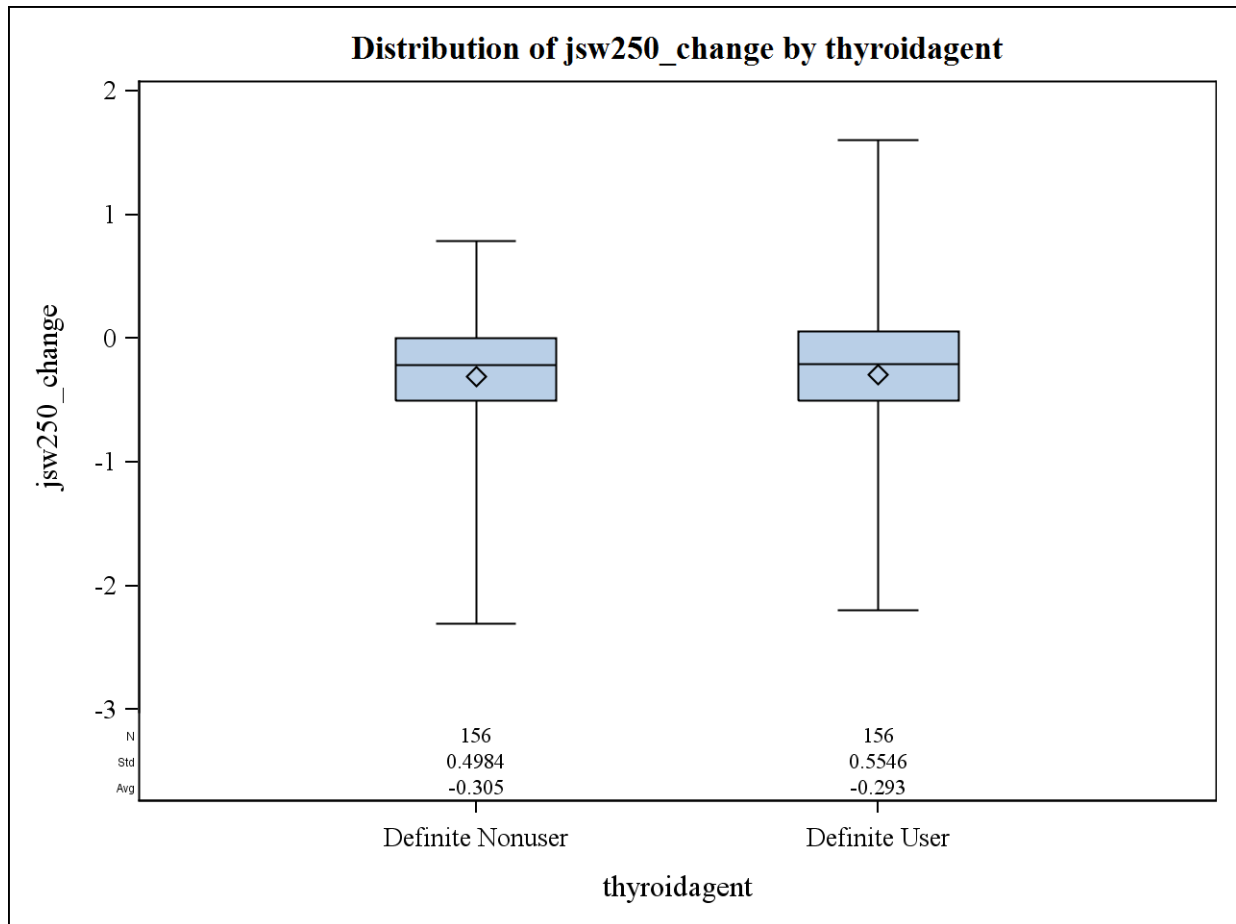



*thyroidagent - JSW250 Change (Left Knee)*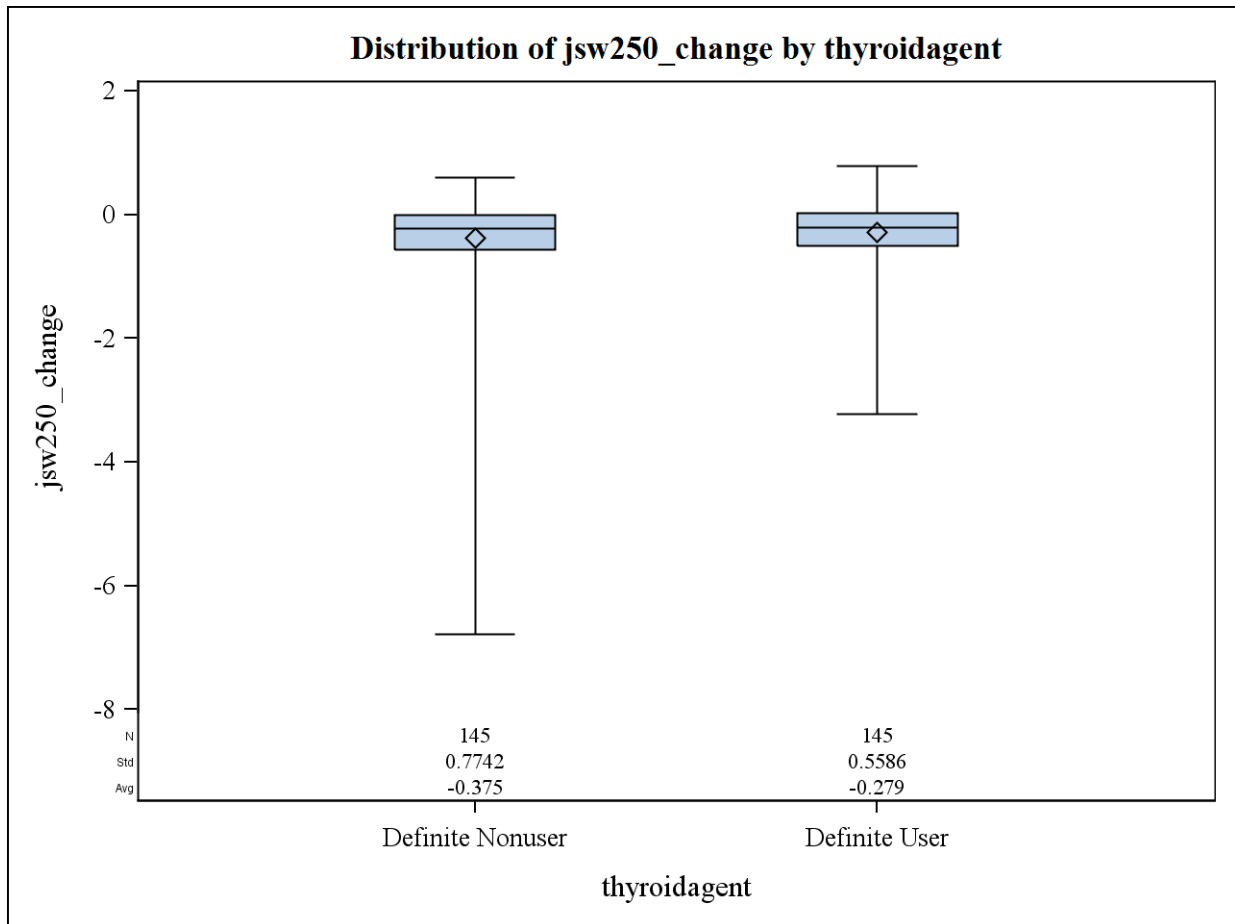

Supplement: Supplement_File2.pdf [file Supplement_File2.pdf]
