# Supplementary material
Source: PubMed Central journal article supplement (PMC5322858)
Supplement: Supplement_File1.pdf [file Supplement_File1.pdf]

| Medication | comparison     | nonuser_njsw250 | nonuser_meanjsw250 | nonuser_st | nonuser_n' |
|------------|----------------|-----------------|--------------------|------------|------------|
| aceinhi    | d_match_l      | 220             | 5.215409091        | 1.552461   | 397        |
| aceinhi    | d_match_ljsw   | 159             | 5.46408805         | 1.584787   | 159        |
| aceinhi    | d_nomatch_l    | 1209            | 5.309768404        | 1.474365   | 2225       |
| aceinhi    | d_nomatch_ljsw | 832             | 5.359579327        | 1.385672   | 832        |
| aceinhi    | p_match_l      | 240             | 5.393416667        | 1.571262   | 397        |
| aceinhi    | p_match_ljsw   | 158             | 5.390696203        | 1.46957    | 158        |
| aceinhi    | p_nomatch_l    | 1213            | 5.308153339        | 1.472803   | 2229       |
| aceinhi    | p_nomatch_ljsw | 836             | 5.356997608        | 1.383786   | 836        |
| alphaad    | d_match_l      | 53              | 5.143396226        | 2.068424   | 89         |
| alphaad    | d_match_ljsw   | 38              | 4.750526316        | 2.006394   | 38         |
| alphaad    | d_nomatch_l    | 1490            | 5.249161074        | 1.518877   | 2713       |
| alphaad    | d_nomatch_ljsw | 1016            | 5.311200787        | 1.400107   | 1015       |
| alphaad    | p_match_l      | 51              | 5.350980392        | 2.187008   | 89         |
| alphaad    | p_match_ljsw   | 38              | 4.820526316        | 2.091491   | 38         |
| alphaad    | p_nomatch_l    | 1492            | 5.250489276        | 1.518466   | 2718       |
| alphaad    | p_nomatch_ljsw | 1017            | 5.311494592        | 1.399449   | 1016       |
| anticoa    | d_match_l      | 43              | 5.416744186        | 1.970347   | 69         |
| anticoa    | d_match_ljsw   | 27              | 5.215555556        | 1.341567   | 27         |
| anticoa    | d_nomatch_l    | 1492            | 5.267365952        | 1.518807   | 2732       |
| anticoa    | d_nomatch_ljsw | 1023            | 5.344516129        | 1.401029   | 1022       |
| anticoa    | p_match_l      | 41              | 5.036097561        | 1.641484   | 69         |
| anticoa    | p_match_ljsw   | 27              | 5.343333333        | 1.371725   | 27         |
| anticoa    | p_nomatch_l    | 1498            | 5.267943925        | 1.522746   | 2740       |
| anticoa    | p_nomatch_ljsw | 1029            | 5.344907677        | 1.407922   | 1028       |
| anticon    | d_match_l      | 39              | 5.112820513        | 1.683897   | 66         |
| anticon    | d_match_ljsw   | 17              | 5.822941177        | 1.29057    | 17         |
| anticon    | d_nomatch_l    | 1514            | 5.272767503        | 1.52547    | 2726       |
| anticon    | d_nomatch_ljsw | 1039            | 5.352069297        | 1.431743   | 1038       |
| anticon    | p_match_l      | 36              | 5.361111111        | 1.627278   | 66         |
| anticon    | p_match_ljsw   | 17              | 5.574705882        | 1.07428    | 17         |
| anticon    | p_nomatch_l    | 1520            | 5.265868421        | 1.53006    | 2740       |
| anticon    | p_nomatch_ljsw | 1043            | 5.347286673        | 1.432365   | 1042       |
| antiest    | d_match_l      | 25              | 5.256              | 1.385989   | 59         |
| antiest    | d_match_ljsw   | 23              | 4.914347826        | 1.266193   | 23         |
| antiest    | d_nomatch_l    | 1568            | 5.274336735        | 1.546742   | 2834       |
| antiest    | d_nomatch_ljsw | 1074            | 5.347867784        | 1.433984   | 1073       |
| antiest    | p_match_l      | 28              | 5.271071429        | 1.103101   | 59         |
| antiest    | p_match_ljsw   | 23              | 4.914347826        | 1.266193   | 23         |
| antiest    | p_nomatch_l    | 1568            | 5.274336735        | 1.546742   | 2835       |
| antiest    | p_nomatch_ljsw | 1074            | 5.347867784        | 1.433984   | 1073       |
| antigou    | d_match_l      | 37              | 5.744594595        | 1.664084   | 57         |
| antigou    | d_match_ljsw   | 27              | 5.277037037        | 1.874796   | 27         |
| antigou    | d_nomatch_l    | 1565            | 5.264920128        | 1.504689   | 2842       |
| antigou    | d_nomatch_ljsw | 1066            | 5.32684803         | 1.398343   | 1065       |
| antigou    | p_match_l      | 30              | 6.119              | 1.206478   | 57         |
| antigou    | p_match_ljsw   | 27              | 5.28962963         | 1.588213   | 27         |
| antigou    | p_nomatch_l    | 1571            | 5.26811585         | 1.504938   | 2850       |
| antigou    | p_nomatch_ljsw | 1071            | 5.329710551        | 1.398973   | 1070       |
| antihis    | d_match_l      | 63              | 5.21031746         | 1.769634   | 108        |

|         |                |      |             |          |      |
|---------|----------------|------|-------------|----------|------|
| antihis | d_match_ljsw   | 42   | 5.503809524 | 1.186125 | 42   |
| antihis | d_nomatch_l    | 1328 | 5.245263554 | 1.562968 | 2392 |
| antihis | d_nomatch_ljsw | 905  | 5.32241989  | 1.430856 | 904  |
| antihis | p_match_l      | 61   | 5.393442623 | 1.480397 | 108  |
| antihis | p_match_ljsw   | 42   | 5.434285714 | 1.402881 | 42   |
| antihis | p_nomatch_l    | 1430 | 5.24479021  | 1.55458  | 2587 |
| antihis | p_nomatch_ljsw | 981  | 5.316452599 | 1.436127 | 980  |
| antilip | d_match_l      | 31   | 5.629354839 | 1.54707  | 63   |
| antilip | d_match_ljsw   | 17   | 4.640588235 | 1.050443 | 17   |
| antilip | d_nomatch_l    | 1473 | 5.254779362 | 1.535417 | 2636 |
| antilip | d_nomatch_ljsw | 1014 | 5.318461539 | 1.407248 | 1013 |
| antilip | p_match_l      | 33   | 4.989090909 | 1.817415 | 63   |
| antilip | p_match_ljsw   | 17   | 5.119411765 | 1.939541 | 17   |
| antilip | p_nomatch_l    | 1481 | 5.253916273 | 1.533956 | 2647 |
| antilip | p_nomatch_ljsw | 1021 | 5.318364349 | 1.405753 | 1020 |
| antineo | d_match_l      | 27   | 5.355185185 | 1.157814 | 48   |
| antineo | d_match_ljsw   | 22   | 5.528181818 | 1.422311 | 22   |
| antineo | d_nomatch_l    | 1516 | 5.251048813 | 1.533183 | 2744 |
| antineo | d_nomatch_ljsw | 1030 | 5.318223301 | 1.416641 | 1029 |
| antineo | p_match_l      | 28   | 5.4575      | 1.569092 | 48   |
| antineo | p_match_ljsw   | 22   | 5.450909091 | 1.726574 | 22   |
| antineo | p_nomatch_l    | 1529 | 5.257377371 | 1.531261 | 2765 |
| antineo | p_nomatch_ljsw | 1040 | 5.324990385 | 1.415632 | 1039 |
| antiulc | d_match_l      | 209  | 5.260382775 | 1.491702 | 353  |
| antiulc | d_match_ljsw   | 147  | 5.346394558 | 1.524748 | 147  |
| antiulc | d_nomatch_l    | 1155 | 5.267939394 | 1.552596 | 2083 |
| antiulc | d_nomatch_ljsw | 782  | 5.367531969 | 1.428875 | 781  |
| antiulc | p_match_l      | 202  | 5.242079208 | 1.675205 | 354  |
| antiulc | p_match_ljsw   | 147  | 5.336666667 | 1.450357 | 147  |
| antiulc | p_nomatch_l    | 1197 | 5.252690059 | 1.554052 | 2150 |
| antiulc | p_nomatch_ljsw | 813  | 5.354059041 | 1.429368 | 812  |
| anxioly | d_match_l      | 19   | 4.670526316 | 1.315014 | 41   |
| anxioly | d_match_ljsw   | 18   | 5.062222222 | 1.238108 | 18   |
| anxioly | d_nomatch_l    | 1430 | 5.264643357 | 1.535735 | 2562 |
| anxioly | d_nomatch_ljsw | 977  | 5.336100307 | 1.418893 | 976  |
| anxioly | p_match_l      | 22   | 5.376363636 | 1.302117 | 42   |
| anxioly | p_match_ljsw   | 18   | 4.669444444 | 1.047285 | 18   |
| anxioly | p_nomatch_l    | 1519 | 5.265082291 | 1.53717  | 2744 |
| anxioly | p_nomatch_ljsw | 1040 | 5.336125    | 1.424016 | 1039 |
| betaadr | d_match_l      | 252  | 5.182539683 | 1.563405 | 465  |
| betaadr | d_match_ljsw   | 178  | 5.309494382 | 1.36111  | 178  |
| betaadr | d_nomatch_l    | 1136 | 5.32790493  | 1.502906 | 2081 |
| betaadr | d_nomatch_ljsw | 784  | 5.403788265 | 1.389431 | 783  |
| betaadr | p_match_l      | 251  | 5.130996016 | 1.63738  | 467  |
| betaadr | p_match_ljsw   | 179  | 5.414189944 | 1.386589 | 178  |
| betaadr | p_nomatch_l    | 1182 | 5.319357022 | 1.518678 | 2157 |
| betaadr | p_nomatch_ljsw | 812  | 5.405418719 | 1.390444 | 811  |
| bisphos | d_match_l      | 134  | 5.159477612 | 1.334688 | 263  |
| bisphos | d_match_ljsw   | 80   | 5.058875    | 1.34633  | 80   |
| bisphos | d_nomatch_l    | 1368 | 5.298413743 | 1.575633 | 2399 |

|         |                |      |             |          |      |
|---------|----------------|------|-------------|----------|------|
| bisphos | d_nomatch_ljsw | 925  | 5.378183784 | 1.466753 | 924  |
| bisphos | p_match_l      | 136  | 4.985441177 | 1.290431 | 262  |
| bisphos | p_match_ljsw   | 80   | 5.348125    | 1.102273 | 80   |
| bisphos | p_nomatch_l    | 1371 | 5.29813275  | 1.575124 | 2406 |
| bisphos | p_nomatch_ljsw | 926  | 5.377235421 | 1.466244 | 925  |
| cachblo | d_match_l      | 183  | 5.183442623 | 1.524755 | 304  |
| cachblo | d_match_ljsw   | 133  | 5.333684211 | 1.293358 | 133  |
| cachblo | d_nomatch_l    | 1282 | 5.325460218 | 1.511082 | 2392 |
| cachblo | d_nomatch_ljsw | 870  | 5.386333333 | 1.402054 | 870  |
| cachblo | p_match_l      | 183  | 5.117322404 | 1.637336 | 303  |
| cachblo | p_match_ljsw   | 133  | 5.210526316 | 1.373325 | 133  |
| cachblo | p_nomatch_l    | 1284 | 5.324657321 | 1.51017  | 2396 |
| cachblo | p_nomatch_ljsw | 871  | 5.385097589 | 1.401722 | 871  |
| cox2inh | d_match_l      | 30   | 4.983       | 1.555467 | 52   |
| cox2inh | d_match_ljsw   | 22   | 5.326363636 | 1.365345 | 22   |
| cox2inh | d_nomatch_l    | 1395 | 5.308322581 | 1.504903 | 2558 |
| cox2inh | d_nomatch_ljsw | 962  | 5.363762994 | 1.408098 | 961  |
| cox2inh | p_match_l      | 28   | 5.165714286 | 0.990179 | 52   |
| cox2inh | p_match_ljsw   | 22   | 5.389545455 | 1.090982 | 22   |
| cox2inh | p_nomatch_l    | 1459 | 5.299705278 | 1.507021 | 2668 |
| cox2inh | p_nomatch_ljsw | 1001 | 5.352927073 | 1.410433 | 1000 |
| estroge | d_match_l      | 66   | 5.215909091 | 1.236828 | 136  |
| estroge | d_match_ljsw   | 52   | 5.049423077 | 1.546909 | 52   |
| estroge | d_nomatch_l    | 1407 | 5.25286425  | 1.564387 | 2510 |
| estroge | d_nomatch_ljsw | 957  | 5.330219436 | 1.446959 | 956  |
| estroge | p_match_l      | 68   | 5.195441177 | 1.128488 | 135  |
| estroge | p_match_ljsw   | 52   | 4.768461539 | 1.291031 | 52   |
| estroge | p_nomatch_l    | 1467 | 5.256898432 | 1.549036 | 2645 |
| estroge | p_nomatch_ljsw | 999  | 5.328608609 | 1.433402 | 998  |
| fibrica | d_match_l      | 22   | 5.169090909 | 1.664572 | 41   |
| fibrica | d_match_ljsw   | 17   | 5.021764706 | 1.811937 | 17   |
| fibrica | d_nomatch_l    | 1567 | 5.27141672  | 1.530333 | 2848 |
| fibrica | d_nomatch_ljsw | 1074 | 5.335912477 | 1.428609 | 1073 |
| fibrica | p_match_l      | 22   | 5.169090909 | 1.664572 | 41   |
| fibrica | p_match_ljsw   | 17   | 5.021764706 | 1.811937 | 17   |
| fibrica | p_nomatch_l    | 1567 | 5.27141672  | 1.530333 | 2848 |
| fibrica | p_nomatch_ljsw | 1074 | 5.335912477 | 1.428609 | 1073 |
| hypogly | d_match_l      | 80   | 5.258375    | 1.535266 | 141  |
| hypogly | d_match_ljsw   | 55   | 5.495818182 | 1.41152  | 55   |
| hypogly | d_nomatch_l    | 1467 | 5.252474438 | 1.528558 | 2680 |
| hypogly | d_nomatch_ljsw | 1011 | 5.319040554 | 1.427826 | 1010 |
| hypogly | p_match_l      | 88   | 5.380681818 | 1.221924 | 141  |
| hypogly | p_match_ljsw   | 55   | 5.346909091 | 1.501223 | 55   |
| hypogly | p_nomatch_l    | 1469 | 5.253825732 | 1.528773 | 2683 |
| hypogly | p_nomatch_ljsw | 1012 | 5.318616601 | 1.427183 | 1011 |
| hypoten | d_match_l      | 152  | 5.049473684 | 1.609381 | 276  |
| hypoten | d_match_ljsw   | 111  | 5.518198198 | 1.414906 | 111  |
| hypoten | d_nomatch_l    | 1281 | 5.313255269 | 1.552304 | 2388 |
| hypoten | d_nomatch_ljsw | 876  | 5.375901827 | 1.455265 | 876  |
| hypoten | p_match_l      | 155  | 5.176129032 | 1.463995 | 275  |

|         |                |      |             |          |      |
|---------|----------------|------|-------------|----------|------|
| hypoten | p_match_ljsw   | 111  | 5.594234234 | 1.18042  | 111  |
| hypoten | p_nomatch_l    | 1284 | 5.311580997 | 1.551135 | 2391 |
| hypoten | p_nomatch_ljsw | 878  | 5.373314351 | 1.454721 | 878  |
| nsaid   | d_match_l      | 45   | 5.668444444 | 1.301951 | 80   |
| nsaid   | d_match_ljsw   | 35   | 5.199428571 | 1.573393 | 35   |
| nsaid   | d_nomatch_l    | 1192 | 5.30045302  | 1.503705 | 2231 |
| nsaid   | d_nomatch_ljsw | 814  | 5.383390663 | 1.395624 | 814  |
| nsaid   | p_match_l      | 37   | 5.287297297 | 1.43938  | 79   |
| nsaid   | p_match_ljsw   | 35   | 5.325714286 | 1.631094 | 35   |
| nsaid   | p_nomatch_l    | 1338 | 5.297727952 | 1.506989 | 2491 |
| nsaid   | p_nomatch_ljsw | 912  | 5.369221491 | 1.390955 | 911  |
| progest | d_match_l      | 28   | 5.204285714 | 1.368872 | 55   |
| progest | d_match_ljsw   | 22   | 5.522727273 | 1.106096 | 22   |
| progest | d_nomatch_l    | 1542 | 5.239876783 | 1.54174  | 2786 |
| progest | d_nomatch_ljsw | 1055 | 5.317990521 | 1.427231 | 1054 |
| progest | p_match_l      | 20   | 5.1285      | 1.697668 | 55   |
| progest | p_match_ljsw   | 22   | 4.843636364 | 1.253967 | 22   |
| progest | p_nomatch_l    | 1548 | 5.241350129 | 1.541011 | 2800 |
| progest | p_nomatch_ljsw | 1060 | 5.317415094 | 1.425383 | 1059 |
| statins | d_match_l      | 470  | 5.28606383  | 1.535506 | 821  |
| statins | d_match_ljsw   | 302  | 5.332715232 | 1.468405 | 301  |
| statins | d_nomatch_l    | 838  | 5.275894988 | 1.453306 | 1535 |
| statins | d_nomatch_ljsw | 580  | 5.337655172 | 1.372534 | 579  |
| statins | p_match_l      | 453  | 5.343554084 | 1.545597 | 820  |
| statins | p_match_ljsw   | 301  | 5.400697674 | 1.403544 | 300  |
| statins | p_nomatch_l    | 842  | 5.283147268 | 1.454583 | 1542 |
| statins | p_nomatch_ljsw | 583  | 5.343138937 | 1.371357 | 582  |
| sulfony | d_match_l      | 36   | 5.196388889 | 1.61166  | 70   |
| sulfony | d_match_ljsw   | 31   | 5.292903226 | 1.080738 | 31   |
| sulfony | d_nomatch_l    | 1536 | 5.256197917 | 1.527646 | 2801 |
| sulfony | d_nomatch_ljsw | 1053 | 5.330189934 | 1.414777 | 1052 |
| sulfony | p_match_l      | 36   | 5.196388889 | 1.61166  | 70   |
| sulfony | p_match_ljsw   | 31   | 5.292903226 | 1.080738 | 31   |
| sulfony | p_nomatch_l    | 1536 | 5.256197917 | 1.527646 | 2801 |
| sulfony | p_nomatch_ljsw | 1053 | 5.330189934 | 1.414777 | 1052 |
| thyroid | d_match_l      | 234  | 5.089316239 | 1.468992 | 417  |
| thyroid | d_match_ljsw   | 145  | 5.335103448 | 1.315832 | 145  |
| thyroid | d_nomatch_l    | 1353 | 5.281456024 | 1.558654 | 2424 |
| thyroid | d_nomatch_ljsw | 934  | 5.346102784 | 1.443943 | 933  |
| thyroid | p_match_l      | 241  | 5.213070539 | 1.38432  | 417  |
| thyroid | p_match_ljsw   | 145  | 5.335103448 | 1.315832 | 145  |
| thyroid | p_nomatch_l    | 1353 | 5.281456024 | 1.558654 | 2426 |
| thyroid | p_nomatch_ljsw | 934  | 5.346102784 | 1.443943 | 933  |
| vitB    | d_match_l      | 24   | 5.0925      | 1.446177 | 49   |
| vitB    | d_match_ljsw   | 16   | 5.3075      | 1.598451 | 16   |
| vitB    | d_nomatch_l    | 1507 | 5.280789648 | 1.526864 | 2750 |
| vitB    | d_nomatch_ljsw | 1033 | 5.340648596 | 1.422315 | 1032 |
| vitB    | p_match_l      | 21   | 5.09        | 2.117607 | 49   |
| vitB    | p_match_ljsw   | 16   | 5.178125    | 1.696232 | 16   |
| vitB    | p_nomatch_l    | 1519 | 5.284206715 | 1.523517 | 2767 |

|          |                |      |             |          |      |
|----------|----------------|------|-------------|----------|------|
| vitB     | p_nomatch_ljsw | 1042 | 5.345662188 | 1.419918 | 1041 |
| ssris    | d_match_l      | 103  | 5.22407767  | 1.521776 | 205  |
| ssris    | d_match_ljsw   | 71   | 5.350704225 | 1.37993  | 71   |
| ssris    | d_nomatch_l    | 1358 | 5.234396171 | 1.546722 | 2481 |
| ssris    | d_nomatch_ljsw | 967  | 5.376101344 | 1.370404 | 968  |
| ssris    | p_match_l      | 102  | 5.200784314 | 1.597745 | 204  |
| ssris    | p_match_ljsw   | 71   | 5.079577465 | 1.411964 | 71   |
| ssris    | p_nomatch_l    | 1475 | 5.373084746 | 1.500565 | 2495 |
| ssris    | p_nomatch_ljsw | 973  | 5.383340185 | 1.381457 | 974  |
| antidep  | d_match_l      | 80   | 4.936125    | 1.486171 | 150  |
| antidep  | d_match_ljsw   | 64   | 5.5015625   | 1.385075 | 64   |
| antidep  | d_nomatch_l    | 1425 | 5.259452632 | 1.560667 | 2548 |
| antidep  | d_nomatch_ljsw | 981  | 5.36520897  | 1.388769 | 982  |
| antidep  | p_match_l      | 87   | 5.282298851 | 1.257724 | 149  |
| antidep  | p_match_ljsw   | 64   | 5.19421875  | 1.258451 | 64   |
| antidep  | p_nomatch_l    | 1531 | 5.366616591 | 1.504441 | 2581 |
| antidep  | p_nomatch_ljsw | 996  | 5.367429719 | 1.382078 | 997  |
| thiazide | d_match_l      | 238  | 5.229201681 | 1.413631 | 419  |
| thiazide | d_match_ljsw   | 157  | 5.392292994 | 1.19289  | 157  |
| thiazide | d_nomatch_l    | 1066 | 5.377401501 | 1.512621 | 1992 |
| thiazide | d_nomatch_ljsw | 766  | 5.483041776 | 1.375009 | 767  |
| thiazide | p_match_l      | 233  | 5.222660944 | 1.5604   | 420  |
| thiazide | p_match_ljsw   | 157  | 5.511401274 | 1.38185  | 157  |
| thiazide | p_nomatch_l    | 1174 | 5.483126065 | 1.484486 | 2012 |
| thiazide | p_nomatch_ljsw | 778  | 5.486015424 | 1.372442 | 779  |

| nonuser_m | nonuser_st | nonuser_nj | nonuser_m | nonuser_st | nonuser_n | nonuser_m | nonuser_stdwpaindelta |
|-----------|------------|------------|-----------|------------|-----------|-----------|-----------------------|
| 2.0466    | 2.97013    | 145        | -0.3131   | 0.51341    | 396       | -0.09343  | 3.04067               |
| 2.44025   | 3.29478    | 159        | -0.33572  | 0.51832    | 159       | 0.21384   | 3.40581               |
| 1.92978   | 2.99969    | 832        | -0.29722  | 0.57437    | 2222      | -0.06672  | 2.86726               |
| 2.1872    | 3.07826    | 832        | -0.29722  | 0.57437    | 832       | 0.07993   | 2.93329               |
| 1.97229   | 3.02439    | 154        | -0.25045  | 0.50138    | 397       | -0.07242  | 2.75102               |
| 2.51266   | 3.33049    | 158        | -0.35139  | 0.51217    | 158       | -0.1962   | 2.83845               |
| 1.93798   | 3.00988    | 836        | -0.29843  | 0.57331    | 2226      | -0.0675   | 2.87015               |
| 2.20783   | 3.10251    | 836        | -0.29843  | 0.57331    | 836       | 0.07715   | 2.94061               |
| 1.76404   | 2.76349    | 31         | -0.36129  | 0.62258    | 88        | -0.19318  | 2.21208               |
| 2.13158   | 3.11206    | 38         | -0.51026  | 0.54145    | 38        | -0.56579  | 2.37148               |
| 2.05557   | 3.15529    | 1016       | -0.29711  | 0.56884    | 2711      | -0.02693  | 2.91689               |
| 2.367     | 3.23905    | 1016       | -0.29711  | 0.56884    | 1015      | 0.11995   | 3.07124               |
| 1.53933   | 2.32602    | 36         | -0.49528  | 0.80967    | 88        | -0.11364  | 1.60052               |
| 2.07895   | 2.64454    | 38         | -0.50868  | 0.54128    | 38        | -0.35526  | 2.35644               |
| 2.05657   | 3.15896    | 1017       | -0.29722  | 0.56857    | 2716      | -0.02982  | 2.92087               |
| 2.37648   | 3.25152    | 1017       | -0.29722  | 0.56857    | 1016      | 0.10999   | 3.0861                |
| 1.88406   | 2.50609    | 31         | -0.38065  | 0.66034    | 69        | 0.12319   | 2.88812               |
| 1.59259   | 3.3312     | 27         | -0.4037   | 0.50577    | 27        | 1         | 2.60177               |
| 2.0151    | 3.09023    | 1023       | -0.29122  | 0.53852    | 2730      | -0.00421  | 2.90637               |
| 2.30088   | 3.15318    | 1023       | -0.29122  | 0.53852    | 1022      | 0.16659   | 3.05383               |
| 1.66667   | 3.0325     | 25         | -0.5352   | 0.72753    | 69        | 0.7971    | 3.40233               |
| 2.74074   | 3.849      | 27         | -0.34296  | 0.62394    | 27        | 0.33333   | 3.77237               |
| 2.01724   | 3.09007    | 1029       | -0.29068  | 0.53736    | 2738      | -0.00566  | 2.90753               |
| 2.30885   | 3.15331    | 1029       | -0.29068  | 0.53736    | 1028      | 0.16172   | 3.05885               |
| 2.48485   | 3.12431    | 26         | -0.305    | 0.54068    | 66        | -0.03788  | 2.81249               |
| 2         | 3.29773    | 17         | -0.35353  | 0.58504    | 17        | -1.17647  | 4.41921               |
| 1.94534   | 3.0341     | 1039       | -0.29639  | 0.57017    | 2723      | -0.01083  | 2.8709                |
| 2.29721   | 3.17526    | 1039       | -0.29639  | 0.57017    | 1038      | 0.12548   | 3.04128               |
| 2.00758   | 3.35639    | 22         | -0.43864  | 0.73141    | 66        | 0.02273   | 2.83445               |
| 1.94118   | 3.57894    | 17         | -0.42882  | 0.66879    | 17        | 0.23529   | 1.75105               |
| 1.95219   | 3.03969    | 1043       | -0.29672  | 0.56924    | 2737      | -0.01809  | 2.87154               |
| 2.29798   | 3.17539    | 1043       | -0.29672  | 0.56924    | 1042      | 0.11828   | 3.04187               |
| 2.22458   | 3.59978    | 13         | -0.25846  | 0.4661     | 59        | -0.12288  | 2.75641               |
| 1.86957   | 2.24225    | 23         | -0.19565  | 0.41833    | 23        | -0.17391  | 2.40553               |
| 2.05672   | 3.1495     | 1074       | -0.29907  | 0.57402    | 2831      | -0.03462  | 2.92286               |
| 2.38257   | 3.25301    | 1074       | -0.29907  | 0.57402    | 1073      | 0.10788   | 3.0956                |
| 2.22458   | 3.24193    | 14         | -0.01714  | 0.36307    | 59        | -0.54661  | 3.01415               |
| 1.86957   | 2.24225    | 23         | -0.19565  | 0.41833    | 23        | -0.17391  | 2.40553               |
| 2.056     | 3.14918    | 1074       | -0.29907  | 0.57402    | 2832      | -0.03355  | 2.9229                |
| 2.38257   | 3.25301    | 1074       | -0.29907  | 0.57402    | 1073      | 0.10788   | 3.0956                |
| 1.57895   | 2.88436    | 26         | -0.50154  | 0.72745    | 57        | 0.77193   | 2.58441               |
| 2.11111   | 2.25889    | 27         | -0.3      | 0.63939    | 27        | 0.03704   | 2.98047               |
| 2.05375   | 3.14724    | 1066       | -0.29809  | 0.56568    | 2839      | -0.05513  | 2.9126                |
| 2.39671   | 3.25562    | 1066       | -0.29809  | 0.56568    | 1065      | 0.06033   | 3.06325               |
| 1.33333   | 2.89293    | 19         | -0.40789  | 0.81348    | 57        | 0.57895   | 2.70547               |
| 2.25926   | 2.7955     | 27         | -0.53926  | 0.50132    | 27        | -0.03704  | 3.4472                |
| 2.0564    | 3.14857    | 1071       | -0.29714  | 0.56778    | 2847      | -0.05462  | 2.9122                |
| 2.39579   | 3.25073    | 1071       | -0.29714  | 0.56778    | 1070      | 0.05911   | 3.0639                |
| 2.55093   | 3.79433    | 43         | -0.3693   | 0.45406    | 108       | -0.11574  | 2.99502               |

|         |         |      |          |         |      |          |         |
|---------|---------|------|----------|---------|------|----------|---------|
| 2.28571 | 2.47214 | 42   | -0.25976 | 0.49038 | 42   | -0.7381  | 1.82208 |
| 1.94691 | 3.03797 | 905  | -0.30041 | 0.57852 | 2390 | -0.00167 | 2.8749  |
| 2.237   | 3.11227 | 905  | -0.30041 | 0.57852 | 904  | 0.08186  | 3.02089 |
| 2.11343 | 2.70587 | 50   | -0.2218  | 0.51149 | 108  | -0.22222 | 2.59545 |
| 2.95238 | 3.35648 | 42   | -0.32857 | 0.47127 | 42   | 0.07143  | 3.00725 |
| 1.98763 | 3.07878 | 981  | -0.30158 | 0.57386 | 2585 | -0.01654 | 2.89393 |
| 2.3176  | 3.20393 | 981  | -0.30158 | 0.57386 | 980  | 0.10816  | 3.07701 |
| 1.5873  | 2.38703 | 20   | -0.172   | 0.61041 | 63   | 0.11905  | 3.25368 |
| 2.05882 | 3.28768 | 17   | -0.10588 | 0.36802 | 17   | 0.47059  | 2.06512 |
| 2.00702 | 3.07155 | 1014 | -0.29049 | 0.57303 | 2633 | -0.03418 | 2.92063 |
| 2.32157 | 3.17828 | 1014 | -0.29049 | 0.57303 | 1013 | 0.13771  | 3.08624 |
| 1.63095 | 3.0572  | 20   | -0.411   | 0.29378 | 63   | 0.21032  | 3.04609 |
| 3.17647 | 3.67823 | 17   | -0.17765 | 0.58391 | 17   | -0.04412 | 4.10814 |
| 2.00699 | 3.0675  | 1021 | -0.29259 | 0.57339 | 2644 | -0.0382  | 2.91729 |
| 2.3174  | 3.17292 | 1021 | -0.29259 | 0.57339 | 1020 | 0.13186  | 3.08048 |
| 1.02083 | 1.52273 | 18   | -0.40667 | 0.55041 | 48   | 0.57292  | 2.32239 |
| 2.09091 | 3.66332 | 22   | -0.40091 | 0.51893 | 22   | 0.70455  | 2.37376 |
| 2.07717 | 3.16696 | 1030 | -0.2997  | 0.57536 | 2742 | -0.03975 | 2.94477 |
| 2.38533 | 3.25448 | 1030 | -0.2997  | 0.57536 | 1029 | 0.11638  | 3.11505 |
| 2.47917 | 4.04227 | 19   | -0.21632 | 0.74164 | 48   | 0.33333  | 3.14428 |
| 1.45455 | 2.4049  | 22   | -0.47091 | 0.43882 | 22   | 0.04545  | 2.59078 |
| 2.0726  | 3.16034 | 1040 | -0.30045 | 0.57405 | 2763 | -0.03728 | 2.93987 |
| 2.3845  | 3.24859 | 1040 | -0.30045 | 0.57405 | 1039 | 0.11044  | 3.10471 |
| 1.96388 | 2.90772 | 158  | -0.3019  | 0.56585 | 353  | 0.11898  | 2.9745  |
| 2.13095 | 3.35159 | 147  | -0.28626 | 0.56351 | 147  | 0.16327  | 2.9362  |
| 1.89522 | 3.00091 | 782  | -0.30317 | 0.58449 | 2081 | -0.01682 | 2.80461 |
| 2.20294 | 3.089   | 782  | -0.30317 | 0.58449 | 781  | 0.07522  | 2.93004 |
| 2.20763 | 3.21381 | 140  | -0.35207 | 0.45718 | 354  | -0.07486 | 3.08348 |
| 2       | 2.72231 | 147  | -0.34286 | 0.53649 | 147  | 0.26531  | 2.92913 |
| 1.90965 | 3.00957 | 813  | -0.30148 | 0.58362 | 2148 | -0.03119 | 2.81402 |
| 2.22722 | 3.11216 | 813  | -0.30148 | 0.58362 | 812  | 0.06866  | 2.95632 |
| 1.41463 | 2.41843 | 14   | -0.225   | 0.57558 | 41   | -0.2439  | 1.8273  |
| 2.61111 | 3.50023 | 18   | -0.24    | 0.33738 | 18   | 1.33333  | 3.83482 |
| 2.00342 | 3.07734 | 977  | -0.29258 | 0.5706  | 2559 | -0.05754 | 2.86599 |
| 2.36527 | 3.18374 | 977  | -0.29258 | 0.5706  | 976  | 0.09016  | 3.11254 |
| 1.64286 | 1.94838 | 17   | -0.53235 | 0.49818 | 42   | 0.08333  | 2.91321 |
| 1.83333 | 2.77064 | 18   | -0.25833 | 0.46548 | 18   | 0.88889  | 2.27231 |
| 2.00756 | 3.0906  | 1040 | -0.29305 | 0.56322 | 2741 | -0.03694 | 2.87437 |
| 2.34504 | 3.15668 | 1040 | -0.29305 | 0.56322 | 1039 | 0.13282  | 3.09348 |
| 1.98656 | 3.0412  | 181  | -0.26635 | 0.53034 | 464  | 0.02586  | 3.21228 |
| 2.2809  | 3.2919  | 178  | -0.27646 | 0.54575 | 178  | -0.18258 | 2.91324 |
| 1.99087 | 3.07847 | 784  | -0.28986 | 0.54776 | 2078 | -0.08253 | 2.85634 |
| 2.28544 | 3.13946 | 784  | -0.28986 | 0.54776 | 783  | 0.06066  | 3.04403 |
| 2.05032 | 3.12067 | 160  | -0.34481 | 0.60221 | 466  | -0.06652 | 2.8865  |
| 2.3441  | 3.15287 | 179  | -0.27877 | 0.59919 | 178  | 0.30197  | 3.28094 |
| 1.98841 | 3.08566 | 812  | -0.29033 | 0.55045 | 2154 | -0.08055 | 2.83792 |
| 2.28915 | 3.1659  | 812  | -0.29033 | 0.55045 | 811  | 0.06473  | 3.01572 |
| 1.85171 | 3.10209 | 80   | -0.24613 | 0.45335 | 263  | -0.15494 | 3.12341 |
| 1.65    | 2.68658 | 80   | -0.15325 | 0.58898 | 80   | 0.475    | 2.85061 |
| 2.11609 | 3.20266 | 925  | -0.30125 | 0.54643 | 2397 | -0.04057 | 2.97725 |

|         |         |      |          |         |      |          |         |
|---------|---------|------|----------|---------|------|----------|---------|
| 2.44048 | 3.28554 | 925  | -0.30125 | 0.54643 | 924  | 0.13122  | 3.16846 |
| 1.37023 | 2.40138 | 93   | -0.20355 | 0.47926 | 262  | -0.14313 | 2.58301 |
| 1.45313 | 2.29925 | 80   | -0.19675 | 0.44004 | 80   | 0.27188  | 2.78252 |
| 2.11586 | 3.19927 | 926  | -0.30136 | 0.54615 | 2404 | -0.04305 | 2.97593 |
| 2.43919 | 3.284   | 926  | -0.30136 | 0.54615 | 925  | 0.13189  | 3.16681 |
| 2.37418 | 3.3099  | 129  | -0.30155 | 0.44902 | 302  | -0.2798  | 2.84934 |
| 2.12782 | 3.17522 | 133  | -0.27579 | 0.50584 | 133  | 0.13534  | 2.49175 |
| 1.88242 | 2.98625 | 870  | -0.27094 | 0.55833 | 2390 | -0.02207 | 2.74587 |
| 2.18707 | 3.09896 | 870  | -0.27094 | 0.55833 | 870  | 0.06408  | 2.80975 |
| 2.26733 | 3.55624 | 122  | -0.21779 | 0.51932 | 302  | 0.21854  | 3.12639 |
| 2.21805 | 3.3288  | 133  | -0.30887 | 0.49586 | 133  | 0.33835  | 2.76309 |
| 1.88136 | 2.98518 | 871  | -0.27086 | 0.55801 | 2394 | -0.01995 | 2.7455  |
| 2.1903  | 3.09865 | 871  | -0.27086 | 0.55801 | 871  | 0.06975  | 2.81311 |
| 1.46154 | 2.87287 | 25   | -0.2544  | 0.31602 | 52   | 0.61538  | 2.74508 |
| 1.77273 | 2.91027 | 22   | -0.52364 | 0.83162 | 22   | 0.63636  | 3.61933 |
| 1.92172 | 3.05669 | 962  | -0.28614 | 0.52134 | 2555 | -0.05157 | 2.82903 |
| 2.24402 | 3.19762 | 962  | -0.28614 | 0.52134 | 961  | 0.09755  | 3.0223  |
| 1.98077 | 3.0646  | 19   | -0.21789 | 0.35931 | 52   | -0.01923 | 2.86624 |
| 1.90909 | 2.22345 | 22   | -0.16091 | 0.30141 | 22   | -0.59091 | 1.94347 |
| 1.93919 | 3.06    | 1001 | -0.28703 | 0.52455 | 2665 | -0.05507 | 2.84236 |
| 2.2705  | 3.19845 | 1001 | -0.28703 | 0.52455 | 1000 | 0.08875  | 3.05917 |
| 1.93382 | 3.06039 | 49   | -0.4251  | 1.10764 | 136  | 0.27206  | 2.98755 |
| 1.84615 | 2.56969 | 52   | -0.13981 | 0.44385 | 52   | 0.09615  | 2.22516 |
| 2.06882 | 3.18896 | 957  | -0.30787 | 0.58015 | 2508 | -0.06689 | 2.88929 |
| 2.40507 | 3.27701 | 957  | -0.30787 | 0.58015 | 956  | 0.07924  | 3.10494 |
| 1.84444 | 2.71224 | 44   | -0.1775  | 0.34618 | 135  | -0.35556 | 2.87155 |
| 2.13462 | 2.9574  | 52   | -0.16558 | 0.38886 | 52   | 0.25     | 2.58104 |
| 2.06682 | 3.17024 | 999  | -0.30696 | 0.57793 | 2643 | -0.06158 | 2.89944 |
| 2.41007 | 3.27487 | 999  | -0.30696 | 0.57793 | 998  | 0.08692  | 3.08981 |
| 1.60976 | 2.57758 | 13   | -0.21231 | 0.23084 | 41   | 0.09756  | 2.04701 |
| 2.70588 | 2.99509 | 17   | -0.22412 | 0.3677  | 17   | -0.47059 | 3.46622 |
| 2.02818 | 3.11156 | 1074 | -0.29735 | 0.57424 | 2845 | -0.042   | 2.89001 |
| 2.35648 | 3.22546 | 1074 | -0.29735 | 0.57424 | 1073 | 0.12092  | 3.07038 |
| 1.60976 | 2.57758 | 13   | -0.21231 | 0.23084 | 41   | 0.09756  | 2.04701 |
| 2.70588 | 2.99509 | 17   | -0.22412 | 0.3677  | 17   | -0.47059 | 3.46622 |
| 2.02818 | 3.11156 | 1074 | -0.29735 | 0.57424 | 2845 | -0.042   | 2.89001 |
| 2.35648 | 3.22546 | 1074 | -0.29735 | 0.57424 | 1073 | 0.12092  | 3.07038 |
| 2.51064 | 3.56093 | 52   | -0.42154 | 0.66711 | 141  | 0.28369  | 3.5139  |
| 2.14545 | 2.59927 | 55   | -0.35345 | 0.53345 | 55   | 0.90909  | 3.22762 |
| 1.9569  | 3.03831 | 1011 | -0.29091 | 0.57032 | 2677 | -0.0297  | 2.87161 |
| 2.26683 | 3.09898 | 1011 | -0.29091 | 0.57032 | 1010 | 0.11386  | 3.03119 |
| 2.4539  | 3.28954 | 62   | -0.26    | 0.35969 | 141  | 0.12943  | 3.36441 |
| 3.23636 | 3.64114 | 55   | -0.23145 | 0.48232 | 55   | -0.01818 | 2.48321 |
| 1.95621 | 3.03684 | 1012 | -0.2903  | 0.57037 | 2680 | -0.03004 | 2.87058 |
| 2.26657 | 3.09745 | 1012 | -0.2903  | 0.57037 | 1011 | 0.11177  | 3.03041 |
| 2.00725 | 2.96156 | 105  | -0.28486 | 0.51739 | 276  | 0.11866  | 3.18458 |
| 2.13514 | 2.95877 | 111  | -0.29622 | 0.4591  | 111  | 0.14189  | 2.74247 |
| 1.96786 | 3.02871 | 876  | -0.28636 | 0.55889 | 2387 | 0.00702  | 2.82386 |
| 2.29252 | 3.12602 | 876  | -0.28636 | 0.55889 | 876  | 0.15868  | 2.94724 |
| 2.06636 | 2.99413 | 113  | -0.25097 | 0.50287 | 275  | -0.05545 | 2.83244 |



|         |         |      |          |         |      |          |         |
|---------|---------|------|----------|---------|------|----------|---------|
| 2.01802 | 2.87302 | 111  | -0.31631 | 0.50753 | 111  | 0.05405  | 2.56493 |
| 1.96581 | 3.0274  | 878  | -0.2867  | 0.55831 | 2390 | 0.00826  | 2.82275 |
| 2.28844 | 3.12371 | 878  | -0.2867  | 0.55831 | 878  | 0.16173  | 2.94544 |
| 2.425   | 3.6657  | 31   | -0.37548 | 0.56926 | 80   | -0.275   | 2.74196 |
| 2.31429 | 3.1227  | 35   | -0.31886 | 0.51418 | 35   | 0.42857  | 3.22021 |
| 1.7779  | 2.82443 | 814  | -0.25725 | 0.49805 | 2228 | -0.00359 | 2.68557 |
| 2.08937 | 2.95969 | 814  | -0.25725 | 0.49805 | 814  | 0.06388  | 2.85242 |
| 2.26582 | 3.01155 | 25   | -0.3444  | 0.3313  | 79   | -0.65823 | 2.71693 |
| 1.71429 | 2.09441 | 35   | -0.23286 | 0.33271 | 35   | 0.08571  | 2.30564 |
| 1.86291 | 2.93756 | 912  | -0.267   | 0.51143 | 2488 | -0.03115 | 2.75377 |
| 2.19402 | 3.08842 | 912  | -0.267   | 0.51143 | 911  | 0.0494   | 2.87599 |
| 1.56364 | 2.5659  | 21   | -0.12    | 0.3351  | 55   | 0.17727  | 2.86044 |
| 1.68182 | 2.07906 | 22   | -0.16591 | 0.29008 | 22   | -0.63636 | 2.38139 |
| 2.08211 | 3.17304 | 1055 | -0.30329 | 0.57242 | 2783 | -0.05587 | 2.92909 |
| 2.41129 | 3.26216 | 1055 | -0.30329 | 0.57242 | 1054 | 0.09274  | 3.09706 |
| 1.83636 | 2.97996 | 16   | -0.12563 | 0.30035 | 55   | -0.2     | 2.86356 |
| 1.68182 | 2.88488 | 22   | -0.17955 | 0.42134 | 22   | 0.80682  | 3.17161 |
| 2.07955 | 3.16899 | 1060 | -0.30434 | 0.57333 | 2797 | -0.05989 | 2.92558 |
| 2.41218 | 3.25813 | 1060 | -0.30434 | 0.57333 | 1059 | 0.08475  | 3.09698 |
| 2.07856 | 3.1094  | 326  | -0.28834 | 0.5329  | 820  | -0.09848 | 2.81021 |
| 2.32724 | 3.21501 | 302  | -0.33093 | 0.54262 | 301  | 0.14701  | 3.30703 |
| 2.00391 | 3.12123 | 580  | -0.28469 | 0.53159 | 1534 | -0.02542 | 2.90577 |
| 2.31952 | 3.17174 | 580  | -0.28469 | 0.53159 | 579  | 0.02461  | 3.01057 |
| 2.07165 | 3.14242 | 319  | -0.32755 | 0.58438 | 820  | -0.06738 | 2.81208 |
| 2.24667 | 3.17514 | 301  | -0.30306 | 0.52274 | 300  | 0.18917  | 3.16397 |
| 2.02075 | 3.14083 | 583  | -0.28364 | 0.53152 | 1541 | -0.01947 | 2.90469 |
| 2.35395 | 3.20011 | 583  | -0.28364 | 0.53152 | 582  | 0.03479  | 3.01355 |
| 2.11429 | 3.54083 | 23   | -0.4887  | 0.67541 | 70   | -0.2     | 3.36478 |
| 2.96774 | 3.80775 | 31   | -0.22968 | 0.4288  | 31   | -0.32258 | 2.27137 |
| 1.96109 | 3.02971 | 1053 | -0.2939  | 0.57715 | 2798 | -0.02618 | 2.85276 |
| 2.27804 | 3.11646 | 1053 | -0.2939  | 0.57715 | 1052 | 0.11098  | 3.02845 |
| 2.11429 | 3.54083 | 23   | -0.4887  | 0.67541 | 70   | -0.2     | 3.36478 |
| 2.96774 | 3.80775 | 31   | -0.22968 | 0.4288  | 31   | -0.32258 | 2.27137 |
| 1.96109 | 3.02971 | 1053 | -0.2939  | 0.57715 | 2798 | -0.02618 | 2.85276 |
| 2.27804 | 3.11646 | 1053 | -0.2939  | 0.57715 | 1052 | 0.11098  | 3.02845 |
| 1.94065 | 3.09916 | 161  | -0.30708 | 0.52908 | 417  | 0.31715  | 3.31789 |
| 2.07586 | 2.85551 | 145  | -0.37455 | 0.77417 | 145  | 0.16724  | 2.77264 |
| 2.05827 | 3.17764 | 934  | -0.30019 | 0.56838 | 2422 | -0.05109 | 2.90512 |
| 2.39255 | 3.28036 | 934  | -0.30019 | 0.56838 | 933  | 0.08065  | 3.12806 |
| 2.0006  | 3.05009 | 179  | -0.28268 | 0.70471 | 417  | 0.14988  | 3.05518 |
| 2.07586 | 2.85551 | 145  | -0.37455 | 0.77417 | 145  | 0.16724  | 2.77264 |
| 2.05864 | 3.17716 | 934  | -0.30019 | 0.56838 | 2424 | -0.04981 | 2.90459 |
| 2.39255 | 3.28036 | 934  | -0.30019 | 0.56838 | 933  | 0.08065  | 3.12806 |
| 1.79592 | 3.38489 | 17   | -0.47118 | 0.5367  | 49   | 0.16327  | 3.44811 |
| 1.75    | 2.79285 | 16   | -0.30625 | 0.40416 | 16   | 0.78125  | 3.10359 |
| 2.04545 | 3.13119 | 1033 | -0.29304 | 0.57842 | 2748 | -0.03311 | 2.94009 |
| 2.40552 | 3.2502  | 1033 | -0.29304 | 0.57842 | 1032 | 0.08503  | 3.13791 |
| 2.02551 | 2.75106 | 15   | -0.49    | 0.70715 | 49   | -0.47449 | 2.81099 |
| 1.9375  | 3.58643 | 16   | -0.22188 | 0.34087 | 16   | 0.125    | 2.18708 |
| 2.04048 | 3.12746 | 1042 | -0.2914  | 0.57676 | 2765 | -0.0311  | 2.93273 |

|         |         |      |          |         |      |          |         |
|---------|---------|------|----------|---------|------|----------|---------|
| 2.4001  | 3.24872 | 1042 | -0.2914  | 0.57676 | 1041 | 0.08814  | 3.12605 |
| 1.78415 | 2.71254 | 72   | -0.19917 | 0.41835 | 205  | -0.05976 | 2.34712 |
| 2.28521 | 3.31617 | 71   | -0.27845 | 0.50053 | 71   | 0.29577  | 2.94331 |
| 1.93632 | 3.05235 | 941  | -0.30779 | 0.5851  | 2478 | -0.01826 | 2.80822 |
| 2.33239 | 3.06349 | 968  | -0.31681 | 0.53032 | 966  | 0.13225  | 2.75935 |
| 2.19485 | 2.90644 | 75   | -0.2464  | 0.43902 | 202  | -0.1349  | 2.64846 |
| 2.80282 | 3.82705 | 71   | -0.35648 | 0.50298 | 71   | 0.41197  | 2.91918 |
| 2.07144 | 2.93525 | 974  | -0.31789 | 0.52945 | 2491 | 0.03191  | 2.74354 |
| 2.32213 | 3.05804 | 974  | -0.31789 | 0.52945 | 972  | 0.14275  | 2.75794 |
| 1.85167 | 2.61065 | 58   | -0.2419  | 0.49128 | 150  | -0.34833 | 2.33138 |
| 1.85938 | 2.92698 | 64   | -0.32375 | 0.46031 | 64   | -0.12891 | 2.54171 |
| 1.99568 | 3.09018 | 968  | -0.29261 | 0.58105 | 2545 | -0.05393 | 2.89254 |
| 2.25509 | 3.00396 | 982  | -0.30711 | 0.52575 | 980  | 0.15179  | 2.87428 |
| 1.83221 | 2.36573 | 69   | -0.36841 | 0.90298 | 149  | 0.17785  | 2.4578  |
| 2.15625 | 2.83526 | 64   | -0.39953 | 0.54926 | 64   | 0.08984  | 2.01402 |
| 2.10345 | 2.95763 | 997  | -0.30647 | 0.52403 | 2577 | 0.03502  | 2.79894 |
| 2.26329 | 2.99617 | 997  | -0.30647 | 0.52403 | 995  | 0.14146  | 2.87791 |
| 2.42184 | 3.49727 | 172  | -0.28715 | 0.6777  | 418  | -0.11423 | 3.06587 |
| 2.30573 | 3.05014 | 157  | -0.26535 | 0.60958 | 157  | 0.01911  | 2.82269 |
| 1.93336 | 2.99721 | 730  | -0.27025 | 0.56749 | 1990 | -0.07739 | 2.73211 |
| 2.27053 | 3.0432  | 767  | -0.28894 | 0.51098 | 765  | 0.12157  | 2.74003 |
| 2.42024 | 3.46546 | 157  | -0.38885 | 0.69718 | 418  | -0.14952 | 3.34861 |
| 2.67038 | 3.32628 | 157  | -0.32236 | 0.51543 | 157  | 0.41879  | 2.94232 |
| 2.06735 | 2.88837 | 779  | -0.29371 | 0.52163 | 2009 | 0.055    | 2.68007 |
| 2.2561  | 3.02921 | 779  | -0.29371 | 0.52163 | 777  | 0.13771  | 2.73402 |

| user_njsw2 | user_mean | user_stdjsw | user_nwpa | user_mean | user_stdwpa | user_njsw250delta | user_mean |
|------------|-----------|-------------|-----------|-----------|-------------|-------------------|-----------|
| 237        | 5.220675  | 1.723615    | 398       | 2.26633   | 3.26212     | 159               | -0.29365  |
| 159        | 5.269748  | 1.582015    | 159       | 2.82862   | 3.35022     | 159               | -0.29239  |
| 242        | 5.217851  | 1.712562    | 404       | 2.27723   | 3.26263     | 162               | -0.2884   |
| 162        | 5.275494  | 1.576004    | 162       | 2.78858   | 3.33234     | 162               | -0.2884   |
| 237        | 5.220675  | 1.723615    | 398       | 2.26633   | 3.26212     | 159               | -0.29365  |
| 158        | 5.274873  | 1.58572     | 158       | 2.84652   | 3.35324     | 158               | -0.29203  |
| 242        | 5.217851  | 1.712562    | 404       | 2.27723   | 3.26263     | 162               | -0.2884   |
| 162        | 5.275494  | 1.576004    | 162       | 2.78858   | 3.33234     | 162               | -0.2884   |
| 58         | 5.538448  | 1.642048    | 89        | 1.69663   | 2.52445     | 39                | -0.24513  |
| 38         | 5.626053  | 1.622738    | 38        | 2.07895   | 2.46469     | 38                | -0.23368  |
| 60         | 5.578333  | 1.646346    | 92        | 1.75      | 2.536       | 41                | -0.25512  |
| 41         | 5.654634  | 1.615627    | 41        | 2.04878   | 2.45918     | 41                | -0.25512  |
| 58         | 5.538448  | 1.642048    | 89        | 1.69663   | 2.52445     | 39                | -0.24513  |
| 38         | 5.626053  | 1.622738    | 38        | 2.07895   | 2.46469     | 38                | -0.23368  |
| 60         | 5.578333  | 1.646346    | 92        | 1.75      | 2.536       | 41                | -0.25512  |
| 41         | 5.654634  | 1.615627    | 41        | 2.04878   | 2.45918     | 41                | -0.25512  |
| 47         | 4.896809  | 1.668435    | 69        | 2.25725   | 3.53136     | 27                | -0.18704  |
| 27         | 5.138889  | 1.719428    | 27        | 2.9537    | 3.80286     | 27                | -0.18704  |
| 47         | 4.896809  | 1.668435    | 69        | 2.25725   | 3.53136     | 27                | -0.18704  |
| 27         | 5.138889  | 1.719428    | 27        | 2.9537    | 3.80286     | 27                | -0.18704  |
| 47         | 4.896809  | 1.668435    | 69        | 2.25725   | 3.53136     | 27                | -0.18704  |
| 27         | 5.138889  | 1.719428    | 27        | 2.9537    | 3.80286     | 27                | -0.18704  |
| 47         | 4.896809  | 1.668435    | 69        | 2.25725   | 3.53136     | 27                | -0.18704  |
| 27         | 5.138889  | 1.719428    | 27        | 2.9537    | 3.80286     | 27                | -0.18704  |
| 31         | 5.529032  | 1.491903    | 66        | 3.31818   | 4.19582     | 17                | -0.42235  |
| 17         | 4.917059  | 0.991273    | 17        | 3.05882   | 2.9041      | 17                | -0.42235  |
| 32         | 5.48375   | 1.489829    | 67        | 3.28358   | 4.17353     | 18                | -0.39778  |
| 18         | 4.870556  | 0.981706    | 18        | 2.94444   | 2.85888     | 18                | -0.39778  |
| 31         | 5.529032  | 1.491903    | 66        | 3.31818   | 4.19582     | 17                | -0.42235  |
| 17         | 4.917059  | 0.991273    | 17        | 3.05882   | 2.9041      | 17                | -0.42235  |
| 32         | 5.48375   | 1.489829    | 67        | 3.28358   | 4.17353     | 18                | -0.39778  |
| 18         | 4.870556  | 0.981706    | 18        | 2.94444   | 2.85888     | 18                | -0.39778  |
| 34         | 5.089412  | 1.102204    | 60        | 2         | 3.07533     | 23                | -0.16913  |
| 23         | 4.98087   | 1.082875    | 23        | 2.65217   | 3.49816     | 23                | -0.16913  |
| 34         | 5.089412  | 1.102204    | 61        | 1.96721   | 3.06032     | 23                | -0.16913  |
| 23         | 4.98087   | 1.082875    | 23        | 2.65217   | 3.49816     | 23                | -0.16913  |
| 34         | 5.089412  | 1.102204    | 60        | 2         | 3.07533     | 23                | -0.16913  |
| 23         | 4.98087   | 1.082875    | 23        | 2.65217   | 3.49816     | 23                | -0.16913  |
| 34         | 5.089412  | 1.102204    | 61        | 1.96721   | 3.06032     | 23                | -0.16913  |
| 23         | 4.98087   | 1.082875    | 23        | 2.65217   | 3.49816     | 23                | -0.16913  |
| 34         | 5.465588  | 2.258246    | 57        | 1.80702   | 2.73495     | 27                | -0.32815  |
| 27         | 5.471111  | 2.261695    | 27        | 2.40741   | 3.41106     | 27                | -0.32815  |
| 36         | 5.3375    | 2.282623    | 59        | 1.86441   | 2.78207     | 28                | -0.31821  |
| 28         | 5.439286  | 2.225796    | 28        | 2.32143   | 3.37807     | 28                | -0.31821  |
| 34         | 5.465588  | 2.258246    | 57        | 1.80702   | 2.73495     | 27                | -0.32815  |
| 27         | 5.471111  | 2.261695    | 27        | 2.40741   | 3.41106     | 27                | -0.32815  |
| 36         | 5.3375    | 2.282623    | 59        | 1.86441   | 2.78207     | 28                | -0.31821  |
| 28         | 5.439286  | 2.225796    | 28        | 2.32143   | 3.37807     | 28                | -0.31821  |
| 65         | 5.474462  | 1.26472     | 108       | 2.83333   | 3.43566     | 42                | -0.17619  |

|     |          |          |     |         |         |     |          |
|-----|----------|----------|-----|---------|---------|-----|----------|
| 42  | 5.54     | 1.311904 | 42  | 3.54762 | 3.40876 | 42  | -0.17619 |
| 65  | 5.474462 | 1.26472  | 108 | 2.83333 | 3.43566 | 42  | -0.17619 |
| 42  | 5.54     | 1.311904 | 42  | 3.54762 | 3.40876 | 42  | -0.17619 |
| 65  | 5.474462 | 1.26472  | 108 | 2.83333 | 3.43566 | 42  | -0.17619 |
| 42  | 5.54     | 1.311904 | 42  | 3.54762 | 3.40876 | 42  | -0.17619 |
| 65  | 5.474462 | 1.26472  | 108 | 2.83333 | 3.43566 | 42  | -0.17619 |
| 42  | 5.54     | 1.311904 | 42  | 3.54762 | 3.40876 | 42  | -0.17619 |
| 28  | 5.505357 | 1.545288 | 63  | 1.85714 | 3.03664 | 17  | -0.23176 |
| 17  | 5.513529 | 1.492372 | 17  | 1.47059 | 2.23935 | 17  | -0.23176 |
| 28  | 5.505357 | 1.545288 | 63  | 1.85714 | 3.03664 | 17  | -0.23176 |
| 17  | 5.513529 | 1.492372 | 17  | 1.47059 | 2.23935 | 17  | -0.23176 |
| 28  | 5.505357 | 1.545288 | 63  | 1.85714 | 3.03664 | 17  | -0.23176 |
| 17  | 5.513529 | 1.492372 | 17  | 1.47059 | 2.23935 | 17  | -0.23176 |
| 28  | 5.505357 | 1.545288 | 63  | 1.85714 | 3.03664 | 17  | -0.23176 |
| 17  | 5.513529 | 1.492372 | 17  | 1.47059 | 2.23935 | 17  | -0.23176 |
| 26  | 5.511923 | 1.466771 | 48  | 1.60417 | 2.44723 | 22  | -0.14773 |
| 22  | 5.767273 | 1.283196 | 22  | 2.72727 | 2.83149 | 22  | -0.14773 |
| 26  | 5.511923 | 1.466771 | 48  | 1.60417 | 2.44723 | 22  | -0.14773 |
| 22  | 5.767273 | 1.283196 | 22  | 2.72727 | 2.83149 | 22  | -0.14773 |
| 26  | 5.511923 | 1.466771 | 48  | 1.60417 | 2.44723 | 22  | -0.14773 |
| 22  | 5.767273 | 1.283196 | 22  | 2.72727 | 2.83149 | 22  | -0.14773 |
| 26  | 5.511923 | 1.466771 | 48  | 1.60417 | 2.44723 | 22  | -0.14773 |
| 22  | 5.767273 | 1.283196 | 22  | 2.72727 | 2.83149 | 22  | -0.14773 |
| 200 | 5.32195  | 1.483263 | 355 | 2.15423 | 2.94799 | 148 | -0.25966 |
| 147 | 5.202925 | 1.411456 | 147 | 2.55102 | 3.15631 | 147 | -0.25898 |
| 202 | 5.31703  | 1.476875 | 357 | 2.14216 | 2.94411 | 149 | -0.25718 |
| 149 | 5.196242 | 1.403129 | 149 | 2.5302  | 3.14217 | 149 | -0.25718 |
| 200 | 5.32195  | 1.483263 | 355 | 2.15423 | 2.94799 | 148 | -0.25966 |
| 147 | 5.202925 | 1.411456 | 147 | 2.55102 | 3.15631 | 147 | -0.25898 |
| 202 | 5.31703  | 1.476875 | 357 | 2.14216 | 2.94411 | 149 | -0.25718 |
| 149 | 5.196242 | 1.403129 | 149 | 2.5302  | 3.14217 | 149 | -0.25718 |
| 24  | 5.388333 | 1.516723 | 41  | 2.68293 | 4.21568 | 18  | -0.39    |
| 18  | 5.282778 | 1.554753 | 18  | 2.27778 | 4.46958 | 18  | -0.39    |
| 25  | 5.3404   | 1.504007 | 42  | 2.78571 | 4.2169  | 19  | -0.36316 |
| 19  | 5.225263 | 1.531605 | 19  | 2.52632 | 4.47671 | 19  | -0.36316 |
| 25  | 5.3404   | 1.504007 | 42  | 2.78571 | 4.2169  | 19  | -0.36316 |
| 18  | 5.282778 | 1.554753 | 18  | 2.27778 | 4.46958 | 18  | -0.39    |
| 25  | 5.3404   | 1.504007 | 42  | 2.78571 | 4.2169  | 19  | -0.36316 |
| 19  | 5.225263 | 1.531605 | 19  | 2.52632 | 4.47671 | 19  | -0.36316 |
| 262 | 5.140534 | 1.536139 | 467 | 1.93415 | 2.94897 | 180 | -0.25911 |
| 178 | 5.233539 | 1.54499  | 178 | 2.23034 | 2.83995 | 178 | -0.25337 |
| 267 | 5.128951 | 1.525029 | 476 | 1.95011 | 2.94167 | 183 | -0.25765 |
| 183 | 5.216612 | 1.541346 | 183 | 2.2623  | 2.86261 | 183 | -0.25765 |
| 262 | 5.140534 | 1.536139 | 468 | 1.93857 | 2.94736 | 180 | -0.25911 |
| 179 | 5.233352 | 1.540646 | 179 | 2.21788 | 2.83686 | 179 | -0.25559 |
| 267 | 5.128951 | 1.525029 | 476 | 1.95011 | 2.94167 | 183 | -0.25765 |
| 183 | 5.216612 | 1.541346 | 183 | 2.2623  | 2.86261 | 183 | -0.25765 |
| 119 | 4.913361 | 1.253298 | 263 | 1.36217 | 2.39    | 82  | -0.23829 |
| 80  | 5.039625 | 1.045322 | 80  | 1.56563 | 2.47894 | 80  | -0.23725 |
| 120 | 4.91     | 1.248564 | 265 | 1.35189 | 2.38385 | 83  | -0.23578 |

|     |          |          |     |         |         |     |          |
|-----|----------|----------|-----|---------|---------|-----|----------|
| 83  | 5.004699 | 1.054    | 83  | 1.53313 | 2.44069 | 83  | -0.23578 |
| 119 | 4.913361 | 1.253298 | 263 | 1.36217 | 2.39    | 82  | -0.23829 |
| 80  | 5.039625 | 1.045322 | 80  | 1.56563 | 2.47894 | 80  | -0.23725 |
| 120 | 4.91     | 1.248564 | 265 | 1.35189 | 2.38385 | 83  | -0.23578 |
| 83  | 5.004699 | 1.054    | 83  | 1.53313 | 2.44069 | 83  | -0.23578 |
| 186 | 4.947957 | 1.502758 | 304 | 3.02714 | 3.81139 | 135 | -0.36696 |
| 133 | 5.089173 | 1.465662 | 133 | 3.09774 | 3.56937 | 133 | -0.3609  |
| 189 | 4.965661 | 1.50001  | 307 | 3.02362 | 3.81116 | 138 | -0.36565 |
| 138 | 5.083478 | 1.464681 | 138 | 3.13768 | 3.65719 | 138 | -0.36565 |
| 186 | 4.947957 | 1.502758 | 304 | 3.02714 | 3.81139 | 135 | -0.36696 |
| 133 | 5.089173 | 1.465662 | 133 | 3.09774 | 3.56937 | 133 | -0.3609  |
| 189 | 4.965661 | 1.50001  | 307 | 3.02362 | 3.81116 | 138 | -0.36565 |
| 138 | 5.083478 | 1.464681 | 138 | 3.13768 | 3.65719 | 138 | -0.36565 |
| 30  | 5.436    | 1.47756  | 52  | 2.40385 | 3.30335 | 22  | -0.34909 |
| 22  | 5.439545 | 1.477441 | 22  | 3.77273 | 4.09334 | 22  | -0.34909 |
| 30  | 5.436    | 1.47756  | 52  | 2.40385 | 3.30335 | 22  | -0.34909 |
| 22  | 5.439545 | 1.477441 | 22  | 3.77273 | 4.09334 | 22  | -0.34909 |
| 30  | 5.436    | 1.47756  | 52  | 2.40385 | 3.30335 | 22  | -0.34909 |
| 22  | 5.439545 | 1.477441 | 22  | 3.77273 | 4.09334 | 22  | -0.34909 |
| 30  | 5.436    | 1.47756  | 52  | 2.40385 | 3.30335 | 22  | -0.34909 |
| 22  | 5.439545 | 1.477441 | 22  | 3.77273 | 4.09334 | 22  | -0.34909 |
| 73  | 5.450822 | 1.384864 | 136 | 1.85294 | 2.6598  | 52  | -0.2425  |
| 52  | 5.488654 | 1.445771 | 52  | 2.51923 | 3.20227 | 52  | -0.2425  |
| 74  | 5.450676 | 1.375347 | 137 | 1.83942 | 2.65472 | 53  | -0.22717 |
| 53  | 5.487736 | 1.431818 | 53  | 2.4717  | 3.19015 | 53  | -0.22717 |
| 73  | 5.450822 | 1.384864 | 136 | 1.85294 | 2.6598  | 52  | -0.2425  |
| 52  | 5.488654 | 1.445771 | 52  | 2.51923 | 3.20227 | 52  | -0.2425  |
| 74  | 5.450676 | 1.375347 | 137 | 1.83942 | 2.65472 | 53  | -0.22717 |
| 53  | 5.487736 | 1.431818 | 53  | 2.4717  | 3.19015 | 53  | -0.22717 |
| 25  | 5.49     | 1.544547 | 41  | 2.07317 | 2.96134 | 17  | -0.42647 |
| 17  | 5.458824 | 1.222855 | 17  | 3.05882 | 3.50839 | 17  | -0.42647 |
| 25  | 5.49     | 1.544547 | 41  | 2.07317 | 2.96134 | 17  | -0.42647 |
| 17  | 5.458824 | 1.222855 | 17  | 3.05882 | 3.50839 | 17  | -0.42647 |
| 25  | 5.49     | 1.544547 | 41  | 2.07317 | 2.96134 | 17  | -0.42647 |
| 17  | 5.458824 | 1.222855 | 17  | 3.05882 | 3.50839 | 17  | -0.42647 |
| 25  | 5.49     | 1.544547 | 41  | 2.07317 | 2.96134 | 17  | -0.42647 |
| 17  | 5.458824 | 1.222855 | 17  | 3.05882 | 3.50839 | 17  | -0.42647 |
| 85  | 5.330353 | 1.605638 | 141 | 3.16844 | 3.94001 | 55  | -0.30255 |
| 55  | 5.538    | 1.366221 | 55  | 3.74545 | 4.04245 | 55  | -0.30255 |
| 86  | 5.339302 | 1.598322 | 143 | 3.17308 | 3.93435 | 56  | -0.30071 |
| 56  | 5.548036 | 1.355826 | 56  | 3.80357 | 4.02907 | 56  | -0.30071 |
| 85  | 5.330353 | 1.605638 | 141 | 3.16844 | 3.94001 | 55  | -0.30255 |
| 55  | 5.538    | 1.366221 | 55  | 3.74545 | 4.04245 | 55  | -0.30255 |
| 86  | 5.339302 | 1.598322 | 143 | 3.17308 | 3.93435 | 56  | -0.30071 |
| 56  | 5.548036 | 1.355826 | 56  | 3.80357 | 4.02907 | 56  | -0.30071 |
| 165 | 5.174061 | 1.492628 | 276 | 2.32246 | 3.59004 | 114 | -0.31193 |
| 111 | 5.34045  | 1.240004 | 111 | 2.43243 | 3.22947 | 111 | -0.29559 |
| 167 | 5.175629 | 1.48581  | 279 | 2.32616 | 3.59222 | 116 | -0.30974 |
| 116 | 5.324224 | 1.242847 | 116 | 2.5     | 3.31662 | 116 | -0.30974 |
| 165 | 5.174061 | 1.492628 | 276 | 2.32246 | 3.59004 | 114 | -0.31193 |

|     |          |          |     |         |         |     |          |
|-----|----------|----------|-----|---------|---------|-----|----------|
| 111 | 5.34045  | 1.240004 | 111 | 2.43243 | 3.22947 | 111 | -0.29559 |
| 167 | 5.175629 | 1.48581  | 279 | 2.32616 | 3.59222 | 116 | -0.30974 |
| 116 | 5.324224 | 1.242847 | 116 | 2.5     | 3.31662 | 116 | -0.30974 |
| 55  | 5.493818 | 1.54674  | 80  | 3.3     | 3.76661 | 36  | -0.39222 |
| 35  | 5.807143 | 1.404641 | 35  | 2.45714 | 2.41737 | 35  | -0.38743 |
| 56  | 5.539464 | 1.570219 | 81  | 3.25926 | 3.76091 | 37  | -0.39081 |
| 37  | 5.857297 | 1.415879 | 37  | 2.45946 | 2.42206 | 37  | -0.39081 |
| 55  | 5.493818 | 1.54674  | 80  | 3.3     | 3.76661 | 36  | -0.39222 |
| 35  | 5.807143 | 1.404641 | 35  | 2.45714 | 2.41737 | 35  | -0.38743 |
| 56  | 5.539464 | 1.570219 | 81  | 3.25926 | 3.76091 | 37  | -0.39081 |
| 37  | 5.857297 | 1.415879 | 37  | 2.45946 | 2.42206 | 37  | -0.39081 |
| 30  | 6.134667 | 1.41718  | 55  | 1.4     | 2.70528 | 22  | -0.20636 |
| 22  | 6.058182 | 1.499529 | 22  | 2.18182 | 3.4591  | 22  | -0.20636 |
| 31  | 6.112258 | 1.398935 | 56  | 1.375   | 2.68709 | 23  | -0.17261 |
| 23  | 6.031304 | 1.470712 | 23  | 2.08696 | 3.41005 | 23  | -0.17261 |
| 30  | 6.134667 | 1.41718  | 55  | 1.4     | 2.70528 | 22  | -0.20636 |
| 22  | 6.058182 | 1.499529 | 22  | 2.18182 | 3.4591  | 22  | -0.20636 |
| 31  | 6.112258 | 1.398935 | 56  | 1.375   | 2.68709 | 23  | -0.17261 |
| 23  | 6.031304 | 1.470712 | 23  | 2.08696 | 3.41005 | 23  | -0.17261 |
| 462 | 5.306558 | 1.670015 | 821 | 1.94884 | 2.90203 | 310 | -0.30148 |
| 302 | 5.377914 | 1.559475 | 302 | 2.3245  | 3.07719 | 302 | -0.29785 |
| 475 | 5.313768 | 1.662022 | 839 | 1.94398 | 2.90304 | 320 | -0.30325 |
| 320 | 5.390375 | 1.544085 | 320 | 2.25    | 3.05026 | 320 | -0.30325 |
| 463 | 5.31013  | 1.669975 | 821 | 1.95371 | 2.90211 | 310 | -0.30148 |
| 301 | 5.382359 | 1.528746 | 301 | 2.31894 | 3.08404 | 301 | -0.28804 |
| 475 | 5.313768 | 1.662022 | 839 | 1.94398 | 2.90304 | 320 | -0.30325 |
| 320 | 5.390375 | 1.544085 | 320 | 2.25    | 3.05026 | 320 | -0.30325 |
| 43  | 5.65093  | 1.432776 | 70  | 3.8     | 4.20696 | 31  | -0.30355 |
| 31  | 5.643548 | 1.535228 | 31  | 4.06452 | 4.06559 | 31  | -0.30355 |
| 43  | 5.65093  | 1.432776 | 70  | 3.8     | 4.20696 | 31  | -0.30355 |
| 31  | 5.643548 | 1.535228 | 31  | 4.06452 | 4.06559 | 31  | -0.30355 |
| 43  | 5.65093  | 1.432776 | 70  | 3.8     | 4.20696 | 31  | -0.30355 |
| 31  | 5.643548 | 1.535228 | 31  | 4.06452 | 4.06559 | 31  | -0.30355 |
| 43  | 5.65093  | 1.432776 | 70  | 3.8     | 4.20696 | 31  | -0.30355 |
| 31  | 5.643548 | 1.535228 | 31  | 4.06452 | 4.06559 | 31  | -0.30355 |
| 227 | 5.180661 | 1.393522 | 416 | 2.0631  | 2.91415 | 145 | -0.28324 |
| 145 | 5.364276 | 1.274231 | 145 | 2.31724 | 2.86506 | 145 | -0.27897 |
| 230 | 5.187652 | 1.398519 | 419 | 2.04833 | 2.90889 | 148 | -0.27926 |
| 148 | 5.336689 | 1.280539 | 148 | 2.27703 | 2.85031 | 148 | -0.27926 |
| 227 | 5.180661 | 1.393522 | 416 | 2.0631  | 2.91415 | 145 | -0.28324 |
| 145 | 5.364276 | 1.274231 | 145 | 2.31724 | 2.86506 | 145 | -0.27897 |
| 230 | 5.187652 | 1.398519 | 419 | 2.04833 | 2.90889 | 148 | -0.27926 |
| 148 | 5.336689 | 1.280539 | 148 | 2.27703 | 2.85031 | 148 | -0.27926 |
| 24  | 4.749167 | 1.872055 | 49  | 1.81633 | 2.7285  | 16  | -0.44563 |
| 16  | 5.41375  | 1.363187 | 16  | 2.125   | 3.18067 | 16  | -0.44563 |
| 24  | 4.749167 | 1.872055 | 49  | 1.81633 | 2.7285  | 16  | -0.44563 |
| 16  | 5.41375  | 1.363187 | 16  | 2.125   | 3.18067 | 16  | -0.44563 |
| 24  | 4.749167 | 1.872055 | 49  | 1.81633 | 2.7285  | 16  | -0.44563 |
| 16  | 5.41375  | 1.363187 | 16  | 2.125   | 3.18067 | 16  | -0.44563 |
| 24  | 4.749167 | 1.872055 | 49  | 1.81633 | 2.7285  | 16  | -0.44563 |

|     |          |          |     |         |         |     |          |
|-----|----------|----------|-----|---------|---------|-----|----------|
| 16  | 5.41375  | 1.363187 | 16  | 2.125   | 3.18067 | 16  | -0.44563 |
| 116 | 5.43681  | 1.295001 | 205 | 2.39756 | 3.33714 | 80  | -0.1955  |
| 71  | 5.406479 | 0.993601 | 71  | 2.37676 | 2.96644 | 71  | -0.21958 |
| 116 | 5.43681  | 1.295001 | 205 | 2.39756 | 3.33714 | 80  | -0.1955  |
| 73  | 5.376986 | 0.99736  | 73  | 2.35274 | 2.92968 | 73  | -0.23027 |
| 116 | 5.43681  | 1.295001 | 205 | 2.39756 | 3.33714 | 80  | -0.1955  |
| 71  | 5.406479 | 0.993601 | 71  | 2.37676 | 2.96644 | 71  | -0.21958 |
| 119 | 5.377059 | 1.402116 | 205 | 2.40366 | 2.93112 | 73  | -0.23027 |
| 73  | 5.376986 | 0.99736  | 73  | 2.35274 | 2.92968 | 73  | -0.23027 |
| 74  | 5.299459 | 1.354839 | 150 | 2.26    | 3.38459 | 54  | -0.29889 |
| 64  | 5.520625 | 1.059958 | 64  | 2.82813 | 3.20988 | 64  | -0.25703 |
| 74  | 5.299459 | 1.354839 | 150 | 2.26    | 3.38459 | 54  | -0.29889 |
| 65  | 5.537077 | 1.059976 | 65  | 2.83077 | 3.18477 | 65  | -0.27769 |
| 74  | 5.299459 | 1.354839 | 150 | 2.26    | 3.38459 | 54  | -0.29889 |
| 64  | 5.520625 | 1.059958 | 64  | 2.82813 | 3.20988 | 64  | -0.25703 |
| 84  | 5.473452 | 1.1315   | 150 | 2.4     | 2.7902  | 65  | -0.27769 |
| 65  | 5.537077 | 1.059976 | 65  | 2.83077 | 3.18477 | 65  | -0.27769 |
| 253 | 5.062095 | 1.577423 | 420 | 2.25536 | 3.26136 | 180 | -0.30517 |
| 157 | 5.292675 | 1.238043 | 157 | 2.94904 | 3.35084 | 157 | -0.32261 |
| 256 | 5.051445 | 1.576935 | 423 | 2.27482 | 3.27315 | 183 | -0.30661 |
| 163 | 5.27908  | 1.225866 | 163 | 2.9816  | 3.38747 | 163 | -0.33546 |
| 254 | 5.047205 | 1.582417 | 421 | 2.26425 | 3.26258 | 182 | -0.30423 |
| 157 | 5.292675 | 1.238043 | 157 | 2.94904 | 3.35084 | 157 | -0.32261 |
| 261 | 5.223142 | 1.369014 | 422 | 2.45142 | 3.25491 | 163 | -0.33546 |
| 163 | 5.27908  | 1.225866 | 163 | 2.9816  | 3.38747 | 163 | -0.33546 |

| user_stdjsw | user_nwpa | user_mean | user_stdwř | jsw250pstd | wpainpstd | jsw250delt | wpaindelta | jsw250d  |
|-------------|-----------|-----------|------------|------------|-----------|------------|------------|----------|
| 0.57254     | 398       | 0.11369   | 2.93208    | 1.64346    | 3.11973   | 0.54515    | 2.98673    | 0.0032   |
| 0.57275     | 159       | 0.17138   | 3.5446     | 1.5834     | 3.32262   | 0.54621    | 3.4759     | -0.12274 |
| 0.56855     | 404       | 0.09715   | 2.9235     | 1.51658    | 3.0415    | 0.57343    | 2.87597    | -0.06061 |
| 0.56855     | 162       | 0.16821   | 3.5115     | 1.4183     | 3.1209    | 0.57343    | 3.03463    | -0.05929 |
| 0.57254     | 398       | 0.11369   | 2.93208    | 1.64872    | 3.14565   | 0.53871    | 2.84311    | -0.10477 |
| 0.57455     | 158       | 0.17247   | 3.55584    | 1.52875    | 3.34189   | 0.54426    | 3.21721    | -0.07576 |
| 0.56855     | 404       | 0.09715   | 2.9235     | 1.5152     | 3.04995   | 0.57254    | 2.8784     | -0.0596  |
| 0.56855     | 162       | 0.16821   | 3.5115     | 1.41663    | 3.1408    | 0.57254    | 3.04016    | -0.05753 |
| 0.69454     | 89        | -0.29213  | 2.8212     | 1.8577     | 2.64667   | 0.66376    | 2.53673    | 0.21266  |
| 0.70013     | 38        | -0.26316  | 3.06404    | 1.82468    | 2.8071    | 0.62584    | 2.73973    | 0.47983  |
| 0.67887     | 92        | -0.25     | 2.81138    | 1.52393    | 3.13711   | 0.57339    | 2.91353    | 0.216    |
| 0.67887     | 41        | -0.14634  | 3.02127    | 1.40888    | 3.21291   | 0.57339    | 3.06936    | 0.24376  |
| 0.69454     | 89        | -0.29213  | 2.8212     | 1.91609    | 2.42726   | 0.75194    | 2.29691    | 0.09784  |
| 0.70013     | 38        | -0.26316  | 3.06404    | 1.87185    | 2.5562    | 0.62576    | 2.73323    | 0.43034  |
| 0.67887     | 92        | -0.25     | 2.81138    | 1.52353    | 3.14071   | 0.57313    | 2.91738    | 0.21519  |
| 0.67887     | 41        | -0.14634  | 3.02127    | 1.40824    | 3.22504   | 0.57313    | 3.08367    | 0.24367  |
| 0.36968     | 68        | -0.53676  | 2.99261    | 1.81879    | 3.06194   | 0.54502    | 2.94044    | -0.28587 |
| 0.36968     | 27        | -0.82407  | 3.74282    | 1.54211    | 3.57481   | 0.44298    | 3.22319    | -0.04972 |
| 0.36968     | 68        | -0.53676  | 2.99261    | 1.5235     | 3.10169   | 0.53497    | 2.90847    | -0.24323 |
| 0.36968     | 27        | -0.82407  | 3.74282    | 1.4098     | 3.17093   | 0.53497    | 3.07281    | -0.14586 |
| 0.36968     | 68        | -0.53676  | 2.99261    | 1.65595    | 3.2914    | 0.5702     | 3.20554    | -0.08411 |
| 0.36968     | 27        | -0.82407  | 3.74282    | 1.55532    | 3.826     | 0.51282    | 3.75763    | -0.13145 |
| 0.36968     | 68        | -0.53676  | 2.99261    | 1.52729    | 3.10151   | 0.53386    | 2.90959    | -0.243   |
| 0.36968     | 27        | -0.82407  | 3.74282    | 1.41643    | 3.17095   | 0.53386    | 3.07757    | -0.14545 |
| 0.84688     | 66        | -0.35227  | 3.52981    | 1.60203    | 3.69907   | 0.67686    | 3.19137    | 0.2598   |
| 0.84688     | 17        | -0.05882  | 4.09986    | 1.15069    | 3.10715   | 0.72783    | 4.26252    | -0.78725 |
| 0.82818     | 67        | -0.34701  | 3.50323    | 1.52476    | 3.06594   | 0.57524    | 2.88747    | 0.13837  |
| 0.82818     | 18        | -0.05556  | 3.97747    | 1.42562    | 3.17041   | 0.57524    | 3.05865    | -0.33776 |
| 0.84688     | 66        | -0.35227  | 3.52981    | 1.56625    | 3.79936   | 0.78344    | 3.20107    | 0.10721  |
| 0.84688     | 17        | -0.05882  | 4.09986    | 1.03361    | 3.25904   | 0.76305    | 3.15238    | -0.63626 |
| 0.82818     | 67        | -0.34701  | 3.50323    | 1.52927    | 3.07118   | 0.57432    | 2.88801    | 0.14247  |
| 0.82818     | 18        | -0.05556  | 3.97747    | 1.42626    | 3.17055   | 0.57432    | 3.05917    | -0.33425 |
| 0.3741      | 60        | -0.06667  | 2.95082    | 1.2297     | 3.3456    | 0.40894    | 2.8561     | -0.13547 |
| 0.3741      | 23        | 0.26087   | 2.91107    | 1.1781     | 2.9381    | 0.39683    | 2.67029    | 0.05647  |
| 0.3741      | 61        | -0.04918  | 2.92931    | 1.53887    | 3.14768   | 0.5707     | 2.92299    | -0.12017 |
| 0.3741      | 23        | 0.26087   | 2.91107    | 1.42778    | 3.25812   | 0.5707     | 3.092      | -0.25704 |
| 0.3741      | 60        | -0.06667  | 2.95082    | 1.10261    | 3.15901   | 0.37005    | 2.98238    | -0.16475 |
| 0.3741      | 23        | 0.26087   | 2.91107    | 1.1781     | 2.9381    | 0.39683    | 2.67029    | 0.05647  |
| 0.3741      | 61        | -0.04918  | 2.92931    | 1.53887    | 3.14737   | 0.5707     | 2.92303    | -0.12017 |
| 0.3741      | 23        | 0.26087   | 2.91107    | 1.42778    | 3.25812   | 0.5707     | 3.092      | -0.25704 |
| 0.67176     | 57        | 0.42982   | 3.08139    | 1.97073    | 2.81065   | 0.69962    | 2.84378    | -0.14158 |
| 0.67176     | 27        | 1.38889   | 3.72707    | 2.07727    | 2.89291   | 0.65578    | 3.37448    | 0.09343  |
| 0.6613      | 59        | 0.4661    | 3.04685    | 1.52597    | 3.14035   | 0.56824    | 2.91535    | 0.04756  |
| 0.6613      | 28        | 1.33929   | 3.6668     | 1.42461    | 3.2587    | 0.56824    | 3.07962    | 0.07893  |
| 0.67176     | 57        | 0.42982   | 3.08139    | 1.8426     | 2.81505   | 0.73306    | 2.89953    | -0.35461 |
| 0.67176     | 27        | 1.38889   | 3.72707    | 1.95419    | 3.1185    | 0.5927     | 3.58986    | 0.09287  |
| 0.6613      | 59        | 0.4661    | 3.04685    | 1.52613    | 3.14168   | 0.57027    | 2.91495    | 0.04546  |
| 0.6613      | 28        | 1.33929   | 3.6668     | 1.42509    | 3.25393   | 0.57027    | 3.08017    | 0.07689  |
| 0.59456     | 108       | -0.46759  | 3.00566    | 1.53408    | 3.61944   | 0.52816    | 3.00034    | 0.17218  |



|         |     |          |         |         |         |         |         |          |
|---------|-----|----------|---------|---------|---------|---------|---------|----------|
| 0.59456 | 42  | -0.42857 | 3.34331 | 1.2506  | 2.97751 | 0.54497 | 2.69237 | 0.02894  |
| 0.59456 | 108 | -0.46759 | 3.00566 | 1.55051 | 3.05606 | 0.57923 | 2.88063 | 0.14782  |
| 0.59456 | 42  | -0.42857 | 3.34331 | 1.4259  | 3.12573 | 0.57923 | 3.0356  | 0.15259  |
| 0.59456 | 108 | -0.46759 | 3.00566 | 1.37332 | 3.09237 | 0.55089 | 2.80806 | 0.059    |
| 0.59456 | 42  | -0.42857 | 3.34331 | 1.35815 | 3.38272 | 0.53647 | 3.17972 | 0.07784  |
| 0.59456 | 108 | -0.46759 | 3.00566 | 1.54327 | 3.09375 | 0.57471 | 2.89846 | 0.14882  |
| 0.59456 | 42  | -0.42857 | 3.34331 | 1.43135 | 3.21241 | 0.57471 | 3.08816 | 0.15618  |
| 0.35212 | 63  | -0.34921 | 2.70697 | 1.54623 | 2.73122 | 0.50887 | 2.99283 | -0.08019 |
| 0.35212 | 17  | -0.47059 | 2.29449 | 1.29047 | 2.81279 | 0.36016 | 2.18282 | 0.67645  |
| 0.35212 | 63  | -0.34921 | 2.70697 | 1.53559 | 3.07076 | 0.57025 | 2.91589 | 0.16318  |
| 0.35212 | 17  | -0.47059 | 2.29449 | 1.40861 | 3.1658  | 0.57025 | 3.07548 | 0.13848  |
| 0.35212 | 63  | -0.34921 | 2.70697 | 1.6983  | 3.04694 | 0.32176 | 2.88152 | 0.30399  |
| 0.35212 | 17  | -0.47059 | 2.29449 | 1.73046 | 3.04501 | 0.48216 | 3.32728 | 0.22775  |
| 0.35212 | 63  | -0.34921 | 2.70697 | 1.53416 | 3.0668  | 0.57063 | 2.91263 | 0.16389  |
| 0.35212 | 17  | -0.47059 | 2.29449 | 1.40713 | 3.16058 | 0.57063 | 3.06986 | 0.1387   |
| 0.51295 | 47  | -0.17021 | 1.89185 | 1.31834 | 2.03809 | 0.53003 | 2.12039 | 0.11889  |
| 0.51295 | 22  | -0.22727 | 2.06863 | 1.35454 | 3.27393 | 0.51594 | 2.22643 | 0.17651  |
| 0.51295 | 47  | -0.17021 | 1.89185 | 1.53213 | 3.1562  | 0.57418 | 2.93046 | 0.17027  |
| 0.51295 | 22  | -0.22727 | 2.06863 | 1.4141  | 3.24655 | 0.57418 | 3.09757 | 0.31755  |
| 0.51295 | 47  | -0.17021 | 1.89185 | 1.52076 | 3.34132 | 0.62891 | 2.60129 | 0.03579  |
| 0.51295 | 22  | -0.22727 | 2.06863 | 1.52113 | 2.62687 | 0.47732 | 2.34428 | 0.20798  |
| 0.51295 | 47  | -0.17021 | 1.89185 | 1.53024 | 3.14974 | 0.5729  | 2.92573 | 0.16634  |
| 0.51295 | 22  | -0.22727 | 2.06863 | 1.41313 | 3.24084 | 0.5729  | 3.08755 | 0.31298  |
| 0.47837 | 354 | 0.16384  | 3.07991 | 1.48758 | 2.92798 | 0.52537 | 3.02774 | 0.04139  |
| 0.47994 | 147 | 0.5034   | 3.45036 | 1.46919 | 3.25541 | 0.52339 | 3.20361 | -0.09765 |
| 0.47771 | 356 | 0.17135  | 3.07308 | 1.5416  | 2.99268 | 0.56883 | 2.84533 | 0.03184  |
| 0.47771 | 149 | 0.51007  | 3.42744 | 1.4248  | 3.09754 | 0.56883 | 3.01487 | -0.12022 |
| 0.47837 | 354 | 0.16384  | 3.07991 | 1.58263 | 3.08358 | 0.46819 | 3.08169 | 0.05047  |
| 0.47994 | 147 | 0.5034   | 3.45036 | 1.43104 | 2.94731 | 0.509   | 3.20037 | -0.09346 |
| 0.47771 | 356 | 0.17135  | 3.07308 | 1.54319 | 3.00036 | 0.56858 | 2.85221 | 0.04169  |
| 0.47771 | 149 | 0.51007  | 3.42744 | 1.42535 | 3.11681 | 0.56858 | 3.0338  | -0.11072 |
| 0.67592 | 41  | -0.36585 | 2.91338 | 1.43167 | 3.43662 | 0.63439 | 2.43175 | 0.50138  |
| 0.67592 | 18  | 0        | 1.53393 | 1.40538 | 4.01427 | 0.53418 | 2.92052 | 0.15694  |
| 0.66722 | 42  | -0.45238 | 2.93176 | 1.53522 | 3.09854 | 0.57249 | 2.86704 | 0.04935  |
| 0.66722 | 19  | -0.21053 | 1.75052 | 1.42101 | 3.21181 | 0.57249 | 3.09319 | -0.078   |
| 0.66722 | 42  | -0.45238 | 2.93176 | 1.41339 | 3.28469 | 0.5937  | 2.9225  | -0.02545 |
| 0.67592 | 18  | 0        | 1.53393 | 1.32553 | 3.71844 | 0.58032 | 1.9386  | 0.46271  |
| 0.66722 | 42  | -0.45238 | 2.93176 | 1.53666 | 3.11014 | 0.56516 | 2.87522 | 0.04901  |
| 0.66722 | 19  | -0.21053 | 1.75052 | 1.42592 | 3.18377 | 0.56516 | 3.07551 | -0.07775 |
| 0.51416 | 467 | 0.02944  | 2.81727 | 1.54957 | 2.99534 | 0.52234 | 3.0206  | -0.02711 |
| 0.51376 | 178 | 0.03652  | 3.07166 | 1.45596 | 3.07424 | 0.53    | 2.9935  | -0.05217 |
| 0.51191 | 476 | -0.00263 | 2.81128 | 1.50713 | 3.0535  | 0.54118 | 2.84801 | -0.13201 |
| 0.51191 | 183 | 0.07923  | 3.10715 | 1.41933 | 3.0891  | 0.54118 | 3.05605 | -0.13188 |
| 0.51416 | 468 | 0.02297  | 2.81774 | 1.58648 | 3.03516 | 0.55731 | 2.85225 | 0.00601  |
| 0.51317 | 179 | 0.03631  | 3.06302 | 1.46564 | 2.99859 | 0.55784 | 3.17355 | -0.12338 |
| 0.51191 | 476 | -0.00263 | 2.81128 | 1.51985 | 3.06017 | 0.54359 | 2.83312 | -0.12528 |
| 0.51191 | 183 | 0.07923  | 3.10715 | 1.4193  | 3.11247 | 0.54359 | 3.0327  | -0.13303 |
| 0.42507 | 262 | 0.05439  | 2.45421 | 1.29706 | 2.76903 | 0.43926 | 2.80945 | -0.18975 |
| 0.41654 | 80  | 0.14688  | 2.53791 | 1.20526 | 2.58485 | 0.5101  | 2.69879 | -0.01597 |
| 0.42308 | 264 | 0.05777  | 2.44555 | 1.55198 | 3.13104 | 0.53744 | 2.92897 | -0.25027 |

|         |     |          |         |         |         |         |         |          |
|---------|-----|----------|---------|---------|---------|---------|---------|----------|
| 0.42308 | 83  | 0.20181  | 2.57612 | 1.43755 | 3.22491 | 0.53744 | 3.12434 | -0.25981 |
| 0.42507 | 262 | 0.05439  | 2.45421 | 1.27325 | 2.39568 | 0.45469 | 2.51943 | -0.05661 |
| 0.41654 | 80  | 0.14688  | 2.53791 | 1.07417 | 2.39078 | 0.42845 | 2.66302 | -0.2872  |
| 0.42308 | 264 | 0.05777  | 2.44555 | 1.55155 | 3.1281  | 0.53718 | 2.92788 | -0.25016 |
| 0.42308 | 83  | 0.20181  | 2.57612 | 1.4371  | 3.22353 | 0.53718 | 3.12285 | -0.25923 |
| 0.55313 | 304 | -0.13898 | 3.55465 | 1.51371 | 3.56946 | 0.50495 | 3.22251 | -0.15557 |
| 0.5551  | 133 | 0.18797  | 3.8458  | 1.3822  | 3.37805 | 0.53104 | 3.24029 | -0.1769  |
| 0.54874 | 307 | -0.15147 | 3.54498 | 1.50967 | 3.09094 | 0.55703 | 2.84791 | -0.23833 |
| 0.54874 | 138 | 0.15761  | 3.79457 | 1.41075 | 3.18075 | 0.55703 | 2.96318 | -0.21468 |
| 0.55313 | 304 | -0.13898 | 3.55465 | 1.57094 | 3.68623 | 0.53735 | 3.34808 | -0.10781 |
| 0.5551  | 133 | 0.18797  | 3.8458  | 1.42024 | 3.45118 | 0.52631 | 3.34849 | -0.08545 |
| 0.54874 | 307 | -0.15147 | 3.54498 | 1.50888 | 3.08987 | 0.55676 | 2.84744 | -0.23792 |
| 0.54874 | 138 | 0.15761  | 3.79457 | 1.41045 | 3.1804  | 0.55676 | 2.96579 | -0.21385 |
| 0.4624  | 52  | 0.35577  | 2.95279 | 1.51701 | 3.0956  | 0.39121 | 2.85083 | 0.29861  |
| 0.4624  | 22  | -0.13636 | 3.61604 | 1.4225  | 3.55142 | 0.67283 | 3.61769 | 0.07957  |
| 0.4624  | 52  | 0.35577  | 2.95279 | 1.50435 | 3.0617  | 0.52015 | 2.83151 | 0.08487  |
| 0.4624  | 22  | -0.13636 | 3.61604 | 1.40962 | 3.2194  | 0.52015 | 3.03622 | 0.05376  |
| 0.4624  | 52  | 0.35577  | 2.95279 | 1.26621 | 3.18621 | 0.418   | 2.90984 | 0.21346  |
| 0.4624  | 22  | -0.13636 | 3.61604 | 1.29867 | 3.29387 | 0.3903  | 2.90283 | 0.0385   |
| 0.4624  | 52  | 0.35577  | 2.95279 | 1.50645 | 3.06474 | 0.52335 | 2.84447 | 0.09047  |
| 0.4624  | 22  | -0.13636 | 3.61604 | 1.41184 | 3.21938 | 0.52335 | 3.07166 | 0.06135  |
| 0.44604 | 135 | 0.08519  | 2.65739 | 1.3167  | 2.8671  | 0.83506 | 2.8279  | 0.17841  |
| 0.44604 | 52  | -0.24038 | 2.28484 | 1.49719 | 2.90326 | 0.44495 | 2.2552  | 0.29337  |
| 0.45561 | 136 | 0.09191  | 2.64869 | 1.5556  | 3.16369 | 0.57438 | 2.87749 | 0.12716  |
| 0.45561 | 53  | -0.21698 | 2.26917 | 1.44618 | 3.27258 | 0.57438 | 3.06736 | 0.10892  |
| 0.44604 | 135 | 0.08519  | 2.65739 | 1.26778 | 2.68605 | 0.40343 | 2.76654 | 0.20144  |
| 0.44604 | 52  | -0.24038 | 2.28484 | 1.37059 | 3.08227 | 0.41842 | 2.43744 | 0.52546  |
| 0.45561 | 136 | 0.09191  | 2.64869 | 1.54124 | 3.14698 | 0.57249 | 2.88776 | 0.12573  |
| 0.45561 | 53  | -0.21698 | 2.26917 | 1.43332 | 3.27072 | 0.57249 | 3.05433 | 0.11102  |
| 0.37309 | 41  | 0.67073  | 3.86912 | 1.60168 | 2.7761  | 0.31997 | 3.09519 | 0.20036  |
| 0.37309 | 17  | 0.08824  | 4.42378 | 1.54572 | 3.26186 | 0.37041 | 3.97395 | 0.28275  |
| 0.37309 | 41  | 0.67073  | 3.86912 | 1.53055 | 3.10953 | 0.5718  | 2.90585 | 0.14281  |
| 0.37309 | 17  | 0.08824  | 4.42378 | 1.4258  | 3.2298  | 0.5718  | 3.09457 | 0.0862   |
| 0.37309 | 41  | 0.67073  | 3.86912 | 1.60168 | 2.7761  | 0.31997 | 3.09519 | 0.20036  |
| 0.37309 | 17  | 0.08824  | 4.42378 | 1.54572 | 3.26186 | 0.37041 | 3.97395 | 0.28275  |
| 0.37309 | 41  | 0.67073  | 3.86912 | 1.53055 | 3.10953 | 0.5718  | 2.90585 | 0.14281  |
| 0.37309 | 17  | 0.08824  | 4.42378 | 1.4258  | 3.2298  | 0.5718  | 3.09457 | 0.0862   |
| 0.41496 | 141 | 0.11879  | 3.4091  | 1.57193 | 3.75526 | 0.55201 | 3.4619  | 0.04579  |
| 0.41496 | 55  | 0.33636  | 3.60562 | 1.38906 | 3.39836 | 0.47789 | 3.42184 | 0.03037  |
| 0.4114  | 143 | 0.06818  | 3.43696 | 1.53246 | 3.08963 | 0.56321 | 2.90273 | 0.05666  |
| 0.4114  | 56  | 0.20536  | 3.70476 | 1.4242  | 3.15379 | 0.56321 | 3.06963 | 0.16079  |
| 0.41496 | 141 | 0.11879  | 3.4091  | 1.4234  | 3.62938 | 0.38663 | 3.38683 | -0.03536 |
| 0.41496 | 55  | 0.33636  | 3.60562 | 1.43531 | 3.84703 | 0.4499  | 3.09571 | 0.13314  |
| 0.4114  | 143 | 0.06818  | 3.43696 | 1.53266 | 3.0882  | 0.56327 | 2.90173 | 0.05577  |
| 0.4114  | 56  | 0.20536  | 3.70476 | 1.42359 | 3.15231 | 0.56327 | 3.06887 | 0.16116  |
| 0.63759 | 274 | -0.29836 | 2.91511 | 1.54969 | 3.29084 | 0.58308 | 3.05331 | 0.08039  |
| 0.63699 | 111 | -0.37838 | 2.6425  | 1.33033 | 3.09708 | 0.55522 | 2.69295 | -0.13361 |
| 0.63249 | 277 | -0.30686 | 2.91006 | 1.54482 | 3.09229 | 0.56793 | 2.83292 | -0.08909 |
| 0.63249 | 116 | -0.39871 | 2.77821 | 1.43221 | 3.14875 | 0.56793 | 2.92811 | -0.03608 |
| 0.63759 | 274 | -0.29836 | 2.91511 | 1.47883 | 3.30608 | 0.57449 | 2.874   | -0.0014  |

|         |     |          |         |         |         |         |         |          |
|---------|-----|----------|---------|---------|---------|---------|---------|----------|
| 0.63699 | 111 | -0.37838 | 2.6425  | 1.21058 | 3.05644 | 0.57591 | 2.604   | -0.20964 |
| 0.63249 | 277 | -0.30686 | 2.91006 | 1.54379 | 3.09108 | 0.56741 | 2.83192 | -0.08806 |
| 0.63249 | 116 | -0.39871 | 2.77821 | 1.43177 | 3.14668 | 0.56741 | 2.92655 | -0.03429 |
| 0.57733 | 80  | -0.5375  | 3.146   | 1.44198 | 3.7165  | 0.57362 | 2.9509  | -0.1211  |
| 0.58504 | 35  | -0.17143 | 2.7277  | 1.49141 | 2.7924  | 0.55075 | 2.98413 | 0.40748  |
| 0.56932 | 81  | -0.48148 | 3.16667 | 1.5067  | 2.86199 | 0.50128 | 2.70368 | 0.15863  |
| 0.56932 | 37  | -0.05405 | 2.73806 | 1.39649 | 2.93889 | 0.50128 | 2.84766 | 0.33936  |
| 0.57733 | 80  | -0.5375  | 3.146   | 1.50472 | 3.41243 | 0.49232 | 2.94067 | 0.13725  |
| 0.58504 | 35  | -0.17143 | 2.7277  | 1.52208 | 2.26166 | 0.4759  | 2.5255  | 0.3163   |
| 0.56932 | 81  | -0.48148 | 3.16667 | 1.50954 | 2.96663 | 0.51375 | 2.76757 | 0.16014  |
| 0.56932 | 37  | -0.05405 | 2.73806 | 1.39191 | 3.06572 | 0.51375 | 2.87086 | 0.35065  |
| 0.4532  | 55  | -0.25455 | 1.97407 | 1.3941  | 2.63651 | 0.39997 | 2.45755 | 0.66737  |
| 0.4532  | 22  | -0.45455 | 1.71067 | 1.31758 | 2.85376 | 0.38048 | 2.07333 | 0.40639  |
| 0.47144 | 56  | -0.23214 | 1.96322 | 1.53914 | 3.16434 | 0.57054 | 2.91341 | 0.5668   |
| 0.47144 | 23  | -0.3913  | 1.69864 | 1.42813 | 3.26525 | 0.57054 | 3.07482 | 0.49947  |
| 0.4532  | 55  | -0.25455 | 1.97407 | 1.53435 | 2.84593 | 0.39673 | 2.45937 | 0.65576  |
| 0.4532  | 22  | -0.45455 | 1.71067 | 1.38221 | 3.18496 | 0.43756 | 2.54809 | 0.8787   |
| 0.47144 | 56  | -0.23214 | 1.96322 | 1.53843 | 3.1604  | 0.57144 | 2.91003 | 0.5661   |
| 0.47144 | 23  | -0.3913  | 1.69864 | 1.42632 | 3.26129 | 0.57144 | 3.07485 | 0.50051  |
| 0.50217 | 820 | -0.10091 | 2.74951 | 1.60359 | 3.0075  | 0.51815 | 2.78002 | 0.01278  |
| 0.50345 | 302 | 0.13659  | 3.04734 | 1.51462 | 3.14674 | 0.5234  | 3.17962 | 0.02984  |
| 0.49869 | 838 | -0.10859 | 2.75481 | 1.53205 | 3.04593 | 0.52014 | 2.85337 | 0.02472  |
| 0.49869 | 320 | 0.13438  | 3.01256 | 1.43582 | 3.12908 | 0.52014 | 3.01128 | 0.03672  |
| 0.50217 | 820 | -0.11921 | 2.73742 | 1.60967 | 3.02458 | 0.54541 | 2.775   | -0.02076 |
| 0.4842  | 301 | 0.13372  | 3.03888 | 1.46748 | 3.12984 | 0.50384 | 3.10195 | -0.0125  |
| 0.49869 | 838 | -0.10859 | 2.75481 | 1.5326  | 3.05918 | 0.52014 | 2.85281 | 0.01998  |
| 0.49869 | 320 | 0.13438  | 3.01256 | 1.43489 | 3.14781 | 0.52014 | 3.0132  | 0.03292  |
| 0.32727 | 70  | 0.07143  | 4.13301 | 1.5167  | 3.88819 | 0.50477 | 3.76852 | 0.29969  |
| 0.32727 | 31  | 0.83871  | 3.7336  | 1.32758 | 3.93878 | 0.38143 | 3.09022 | 0.26412  |
| 0.32727 | 70  | 0.07143  | 4.13301 | 1.5252  | 3.06334 | 0.5717  | 2.89025 | 0.25881  |
| 0.32727 | 31  | 0.83871  | 3.7336  | 1.41825 | 3.14667 | 0.5717  | 3.05022 | 0.22095  |
| 0.32727 | 70  | 0.07143  | 4.13301 | 1.5167  | 3.88819 | 0.50477 | 3.76852 | 0.29969  |
| 0.32727 | 31  | 0.83871  | 3.7336  | 1.32758 | 3.93878 | 0.38143 | 3.09022 | 0.26412  |
| 0.32727 | 70  | 0.07143  | 4.13301 | 1.5252  | 3.06334 | 0.5717  | 2.89025 | 0.25881  |
| 0.32727 | 31  | 0.83871  | 3.7336  | 1.41825 | 3.14667 | 0.5717  | 3.05022 | 0.22095  |
| 0.56147 | 416 | -0.01863 | 2.91348 | 1.43233 | 3.00819 | 0.54466 | 3.12248 | 0.06377  |
| 0.55863 | 145 | 0.12931  | 2.87441 | 1.2952  | 2.86029 | 0.67506 | 2.82399 | 0.02252  |
| 0.55705 | 419 | -0.00656 | 2.91005 | 1.53649 | 3.13954 | 0.56686 | 2.90585 | -0.06105 |
| 0.55705 | 148 | 0.17399  | 2.88641 | 1.42281 | 3.22515 | 0.56686 | 3.09624 | -0.00662 |
| 0.56147 | 416 | -0.01863 | 2.91348 | 1.38879 | 2.98297 | 0.6446  | 2.98526 | -0.02334 |
| 0.55863 | 145 | 0.12931  | 2.87441 | 1.2952  | 2.86029 | 0.67506 | 2.82399 | 0.02252  |
| 0.55705 | 419 | -0.00656 | 2.91005 | 1.53649 | 3.13916 | 0.56686 | 2.90539 | -0.06105 |
| 0.55705 | 148 | 0.17399  | 2.88641 | 1.42281 | 3.22515 | 0.56686 | 3.09624 | -0.00662 |
| 0.32819 | 49  | -0.22959 | 2.53919 | 1.67273 | 3.07427 | 0.44809 | 3.02795 | -0.20525 |
| 0.32819 | 16  | 0.375    | 3.42296 | 1.48548 | 2.99305 | 0.36814 | 3.26718 | 0.07153  |
| 0.32819 | 49  | -0.22959 | 2.53919 | 1.53263 | 3.12472 | 0.5756  | 2.93367 | -0.34687 |
| 0.32819 | 16  | 0.375    | 3.42296 | 1.42148 | 3.24922 | 0.5756  | 3.14218 | 0.05143  |
| 0.32819 | 49  | -0.22959 | 2.53919 | 1.99004 | 2.73981 | 0.54508 | 2.67854 | -0.17127 |
| 0.32819 | 16  | 0.375    | 3.42296 | 1.53875 | 3.38963 | 0.33459 | 2.87228 | 0.15313  |
| 0.32819 | 49  | -0.22959 | 2.53919 | 1.5293  | 3.12109 | 0.57398 | 2.92645 | -0.34986 |

|         |     |          |         |         |         |         |         |          |
|---------|-----|----------|---------|---------|---------|---------|---------|----------|
| 0.32819 | 16  | 0.375    | 3.42296 | 1.41913 | 3.24776 | 0.57398 | 3.13047 | 0.04798  |
| 0.36924 | 205 | -0.24878 | 2.90637 | 1.40616 | 3.04092 | 0.39325 | 2.64159 | 0.15129  |
| 0.33726 | 71  | 0.02817  | 3.4663  | 1.20238 | 3.14617 | 0.42678 | 3.21546 | 0.04639  |
| 0.36924 | 205 | -0.24878 | 2.90637 | 1.52855 | 3.07493 | 0.57129 | 2.81581 | 0.13242  |
| 0.34959 | 73  | 0.08219  | 3.4493  | 1.34786 | 3.0544  | 0.51983 | 2.81273 | 0.00066  |
| 0.36924 | 205 | -0.24878 | 2.90637 | 1.44448 | 3.12974 | 0.4045  | 2.78136 | 0.1634   |
| 0.33726 | 71  | 0.02817  | 3.4663  | 1.22084 | 3.42389 | 0.42821 | 3.20444 | 0.26777  |
| 0.34959 | 205 | 0.08902  | 2.87404 | 1.49349 | 2.93494 | 0.51906 | 2.75364 | 0.00266  |
| 0.34959 | 73  | 0.08219  | 3.4493  | 1.35846 | 3.04937 | 0.51906 | 2.81113 | -0.00468 |
| 0.48477 | 150 | -0.08    | 2.76731 | 1.42461 | 3.0225  | 0.48815 | 2.55864 | 0.25504  |
| 0.464   | 64  | 0        | 2.55107 | 1.23328 | 3.07169 | 0.46216 | 2.54639 | 0.01546  |
| 0.48477 | 150 | -0.08    | 2.76731 | 1.55126 | 3.10718 | 0.57645 | 2.88576 | 0.02579  |
| 0.48957 | 65  | 0        | 2.53106 | 1.37088 | 3.01535 | 0.52361 | 2.85441 | 0.12537  |
| 0.48477 | 150 | -0.08    | 2.76731 | 1.30321 | 2.92163 | 0.74911 | 2.61765 | 0.01317  |
| 0.464   | 64  | 0        | 2.55107 | 1.16344 | 3.02837 | 0.50842 | 2.29828 | 0.28055  |
| 0.48957 | 150 | -0.19333 | 2.33358 | 1.48753 | 2.94873 | 0.52201 | 2.77551 | 0.07182  |
| 0.48957 | 65  | 0        | 2.53106 | 1.36477 | 3.00789 | 0.52201 | 2.85812 | 0.1243   |
| 0.58755 | 419 | -0.03162 | 3.06865 | 1.50027 | 3.38123 | 0.6332  | 3.06726 | -0.11138 |
| 0.50069 | 157 | -0.34873 | 3.36409 | 1.21568 | 3.20402 | 0.5578  | 3.10521 | -0.08194 |
| 0.58378 | 422 | -0.03377 | 3.06272 | 1.52526 | 3.04727 | 0.57078 | 2.79268 | -0.21371 |
| 0.4971  | 163 | -0.29908 | 3.44622 | 1.35013 | 3.10605 | 0.50859 | 2.87612 | -0.15107 |
| 0.5845  | 420 | -0.03631 | 3.0696  | 1.57192 | 3.36543 | 0.63913 | 3.2118  | -0.11162 |
| 0.50069 | 157 | -0.34873 | 3.36409 | 1.31192 | 3.33858 | 0.50811 | 3.16025 | -0.16672 |
| 0.4971  | 421 | -0.23575 | 2.9952  | 1.46421 | 2.95508 | 0.51749 | 2.73718 | -0.17756 |
| 0.4971  | 163 | -0.29908 | 3.44622 | 1.34829 | 3.09392 | 0.51749 | 2.86968 | -0.15348 |

| wpaind   | jsw250deltad | wpaindeltad |
|----------|--------------|-------------|
| 0.07043  | 0.03569      | 0.06935     |
| 0.11689  | 0.07933      | -0.01221    |
| 0.11424  | 0.0154       | 0.05698     |
| 0.19269  | 0.0154       | 0.02909     |
| 0.09347  | -0.08018     | 0.06546     |
| 0.0999   | 0.10908      | 0.11459     |
| 0.11123  | 0.01753      | 0.0572      |
| 0.1849   | 0.01753      | 0.02995     |
| -0.02547 | 0.17501      | -0.03901    |
| -0.01875 | 0.44193      | 0.11046     |
| -0.0974  | 0.07322      | -0.07656    |
| -0.09904 | 0.07322      | -0.08676    |
| 0.06481  | 0.33267      | -0.07771    |
| 0        | 0.43946      | 0.0337      |
| -0.09761 | 0.07345      | -0.07547    |
| -0.10161 | 0.07345      | -0.08313    |
| 0.12188  | 0.35523      | -0.22444    |
| 0.38075  | 0.48911      | -0.56592    |
| 0.07807  | 0.19475      | -0.1831     |
| 0.20588  | 0.19475      | -0.3224     |
| 0.17943  | 0.6106       | -0.41611    |
| 0.05566  | 0.30406      | -0.30802    |
| 0.07738  | 0.19414      | -0.18254    |
| 0.20336  | 0.19414      | -0.32032    |
| 0.22528  | -0.17338     | -0.09851    |
| 0.34077  | -0.09456     | 0.2622      |
| 0.43649  | -0.17625     | -0.11643    |
| 0.20415  | -0.17625     | -0.05919    |
| 0.34495  | 0.02078      | -0.11715    |
| 0.34294  | 0.00848      | -0.0933     |
| 0.43351  | -0.17596     | -0.11389    |
| 0.2039   | -0.17596     | -0.05683    |
| -0.06713 | 0.21844      | 0.01968     |
| 0.26637  | 0.06683      | 0.16282     |
| -0.02844 | 0.22768      | -0.00498    |
| 0.08275  | 0.22768      | 0.04948     |
| -0.07109 | -0.41073     | 0.16093     |
| 0.26637  | 0.06683      | 0.16282     |
| -0.02821 | 0.22768      | -0.00535    |
| 0.08275  | 0.22768      | 0.04948     |
| 0.08115  | 0.24784      | -0.1203     |
| 0.10242  | -0.04292     | 0.40061     |
| -0.06029 | -0.03542     | 0.17879     |
| -0.0231  | -0.03542     | 0.4153      |
| 0.16827  | 0.10879      | -0.05143    |
| 0.04751  | 0.35619      | 0.39721     |
| -0.06111 | -0.03695     | 0.17864     |
| -0.02285 | -0.03695     | 0.41562     |
| 0.07803  | 0.36563      | -0.11727    |

|          |          |          |
|----------|----------|----------|
| 0.42381  | 0.15335  | 0.11496  |
| 0.29006  | 0.21446  | -0.16174 |
| 0.4193   | 0.21446  | -0.16815 |
| 0.2328   | 0.08279  | -0.08738 |
| 0.17596  | 0.28404  | -0.15725 |
| 0.27336  | 0.21818  | -0.15562 |
| 0.3829   | 0.21818  | -0.1738  |
| 0.0988   | -0.11745 | -0.15646 |
| -0.20913 | -0.34952 | -0.43117 |
| -0.04881 | 0.10299  | -0.10804 |
| -0.2688  | 0.10299  | -0.19779 |
| 0.07424  | 0.55704  | -0.19418 |
| -0.56022 | -0.11224 | -0.12817 |
| -0.04886 | 0.10659  | -0.10678 |
| -0.26793 | 0.10659  | -0.19625 |
| 0.28622  | 0.48853  | -0.35047 |
| 0.19437  | 0.49071  | -0.41853 |
| -0.14986 | 0.26468  | -0.04452 |
| 0.10533  | 0.26468  | -0.11094 |
| -0.26187 | 0.10906  | -0.19358 |
| 0.4845   | 0.67707  | -0.11634 |
| -0.14872 | 0.26658  | -0.04544 |
| 0.10577  | 0.26658  | -0.10938 |
| 0.06501  | 0.08039  | 0.01482  |
| 0.12904  | 0.05212  | 0.10617  |
| 0.08251  | 0.08085  | 0.06613  |
| 0.10565  | 0.08085  | 0.14423  |
| -0.01732 | 0.19737  | 0.07746  |
| 0.18696  | 0.16479  | 0.0744   |
| 0.07749  | 0.0779   | 0.07101  |
| 0.09721  | 0.0779   | 0.1455   |
| 0.36905  | -0.26009 | -0.05015 |
| -0.08304 | -0.2808  | -0.45654 |
| 0.25247  | -0.12328 | -0.13772 |
| 0.05014  | -0.12328 | -0.09721 |
| 0.34793  | 0.28499  | -0.18331 |
| 0.11952  | -0.22689 | -0.45852 |
| 0.2502   | -0.12405 | -0.14449 |
| 0.05694  | -0.12405 | -0.11164 |
| -0.0175  | 0.01387  | 0.00119  |
| -0.01645 | 0.04357  | 0.07319  |
| -0.01335 | 0.05952  | 0.02806  |
| -0.00749 | 0.05952  | 0.00608  |
| -0.03682 | 0.15378  | 0.03138  |
| -0.04209 | 0.04156  | -0.08371 |
| -0.01252 | 0.06012  | 0.0275   |
| -0.00863 | 0.06012  | 0.00478  |
| -0.17679 | 0.01783  | 0.07451  |
| -0.03264 | -0.16467 | -0.12158 |
| -0.24407 | 0.12182  | 0.03357  |

|          |          |          |
|----------|----------|----------|
| -0.28135 | 0.12182  | 0.02259  |
| -0.00337 | -0.07641 | 0.0784   |
| 0.04706  | -0.09453 | -0.04694 |
| -0.24423 | 0.12208  | 0.03443  |
| -0.28108 | 0.12208  | 0.02239  |
| 0.18293  | -0.12954 | 0.0437   |
| 0.28713  | -0.16028 | 0.01624  |
| 0.36921  | -0.17002 | -0.04543 |
| 0.29886  | -0.17002 | 0.03156  |
| 0.20612  | -0.27761 | -0.10678 |
| 0.2549   | -0.09886 | -0.04491 |
| 0.36968  | -0.17025 | -0.04619 |
| 0.29788  | -0.17025 | 0.02962  |
| 0.3044   | -0.24205 | -0.09107 |
| 0.56316  | 0.25942  | -0.2136  |
| 0.15747  | -0.12102 | 0.14386  |
| 0.47484  | -0.12102 | -0.07704 |
| 0.13278  | -0.31387 | 0.12887  |
| 0.56579  | -0.48215 | 0.15659  |
| 0.15161  | -0.11858 | 0.14443  |
| 0.46662  | -0.11858 | -0.07329 |
| -0.02821 | 0.21867  | -0.06608 |
| 0.23183  | -0.2308  | -0.14923 |
| -0.07251 | 0.1405   | 0.05519  |
| 0.02036  | 0.1405   | -0.09657 |
| 0.00316  | -0.16112 | 0.15931  |
| 0.12478  | -0.18384 | -0.20119 |
| -0.07226 | 0.13937  | 0.05315  |
| 0.01884  | 0.13937  | -0.0995  |
| 0.16693  | -0.66933 | 0.18518  |
| 0.1082   | -0.5463  | 0.14062  |
| 0.01447  | -0.22582 | 0.24528  |
| 0.21746  | -0.22582 | -0.01056 |
| 0.16693  | -0.66933 | 0.18518  |
| 0.1082   | -0.5463  | 0.14062  |
| 0.01447  | -0.22582 | 0.24528  |
| 0.21746  | -0.22582 | -0.01056 |
| 0.17517  | 0.21556  | -0.04763 |
| 0.47082  | 0.10653  | -0.16737 |
| 0.39363  | -0.01741 | 0.03372  |
| 0.48727  | -0.01741 | 0.02981  |
| 0.19688  | -0.11004 | -0.00314 |
| 0.13233  | -0.15801 | 0.11453  |
| 0.39404  | -0.0185  | 0.03385  |
| 0.48758  | -0.0185  | 0.0305   |
| 0.09579  | -0.04643 | -0.13658 |
| 0.09599  | 0.00114  | -0.1932  |
| 0.11587  | -0.04117 | -0.1108  |
| 0.06589  | -0.04117 | -0.19036 |
| 0.07746  | -0.10611 | -0.08452 |

|          |          |          |
|----------|----------|----------|
| 0.13559  | 0.03598  | -0.16606 |
| 0.11658  | -0.04061 | -0.11128 |
| 0.06723  | -0.04061 | -0.1915  |
| 0.23544  | -0.02918 | -0.08896 |
| 0.05116  | -0.12451 | -0.20106 |
| 0.5176   | -0.26644 | -0.17676 |
| 0.12593  | -0.26644 | -0.04142 |
| 0.30306  | -0.09714 | 0.04105  |
| 0.32846  | -0.3248  | -0.10182 |
| 0.47069  | -0.241   | -0.16272 |
| 0.08658  | -0.241   | -0.03603 |
| -0.06207 | -0.21593 | -0.17571 |
| 0.17521  | -0.10632 | 0.08769  |
| -0.22346 | 0.22905  | -0.0605  |
| -0.09933 | 0.22905  | -0.15742 |
| -0.15333 | -0.20351 | -0.02218 |
| 0.15699  | -0.06129 | -0.49502 |
| -0.22293 | 0.23053  | -0.05919 |
| -0.09972 | 0.23053  | -0.15482 |
| -0.04313 | -0.02536 | -0.00088 |
| -0.00087 | 0.0632   | -0.00328 |
| -0.01967 | -0.03568 | -0.02915 |
| -0.02222 | -0.03568 | 0.03645  |
| -0.03899 | 0.0478   | -0.01868 |
| 0.02309  | 0.0298   | -0.01787 |
| -0.0251  | -0.03771 | -0.03124 |
| -0.03302 | -0.03771 | 0.03305  |
| 0.43355  | 0.3668   | 0.07203  |
| 0.27846  | -0.19367 | 0.3758   |
| 0.6003   | -0.01687 | 0.03377  |
| 0.56774  | -0.01687 | 0.23858  |
| 0.43355  | 0.3668   | 0.07203  |
| 0.27846  | -0.19367 | 0.3758   |
| 0.6003   | -0.01687 | 0.03377  |
| 0.56774  | -0.01687 | 0.23858  |
| 0.04071  | 0.04377  | -0.10753 |
| 0.08439  | 0.1416   | -0.01343 |
| -0.00317 | 0.03693  | 0.01532  |
| -0.03582 | 0.03693  | 0.03014  |
| 0.02095  | -0.00087 | -0.05645 |
| 0.08439  | 0.1416   | -0.01343 |
| -0.00328 | 0.03693  | 0.01489  |
| -0.03582 | 0.03693  | 0.03014  |
| 0.00664  | 0.05702  | -0.12974 |
| 0.12529  | -0.37859 | -0.12434 |
| -0.07333 | -0.26509 | -0.06697 |
| -0.08634 | -0.26509 | 0.09228  |
| -0.07635 | 0.08141  | 0.09143  |
| 0.05532  | -0.66874 | 0.08704  |
| -0.07182 | -0.26869 | -0.06783 |



|          |          |          |
|----------|----------|----------|
| -0.0847  | -0.26869 | 0.09164  |
| 0.20172  | 0.00932  | -0.07156 |
| 0.0291   | 0.13795  | -0.08322 |
| 0.15     | 0.19656  | -0.08187 |
| 0.00666  | 0.16647  | -0.0178  |
| 0.06477  | 0.12583  | -0.04094 |
| -0.12444 | 0.31971  | -0.11977 |
| 0.11319  | 0.16879  | 0.02074  |
| 0.01004  | 0.16879  | -0.02154 |
| 0.1351   | -0.11675 | 0.10487  |
| 0.31538  | 0.14436  | 0.05062  |
| 0.08507  | -0.01089 | -0.00903 |
| 0.19092  | 0.05618  | -0.05318 |
| 0.14642  | 0.0928   | -0.09851 |
| 0.22186  | 0.28028  | -0.03909 |
| 0.10057  | 0.05513  | -0.08227 |
| 0.18866  | 0.05513  | -0.04949 |
| -0.04924 | -0.02845 | 0.02693  |
| 0.20078  | -0.10266 | -0.11846 |
| 0.11206  | -0.06371 | 0.01562  |
| 0.22893  | -0.09146 | -0.14626 |
| -0.04635 | 0.1324   | 0.03525  |
| 0.08347  | -0.0005  | -0.24287 |
| 0.12997  | -0.08068 | -0.10622 |
| 0.23449  | -0.08068 | -0.15221 |
